# Supplementary material for: High-density genetic linkage mapping reveals low stability of QTLs across environments for economic traits in Eucalyptus
Source: Front Plant Sci. 2023 Jan 18;13:1099705. doi: 10.3389/fpls.2022.1099705 (PMC10112524; doi:10.3389/fpls.2022.1099705)
Supplement: Supplementary Table 9 — Information of 1052 candidate genes and genes in stable QTLs [file Table_9.xlsx]

## Sheet: 1052 candidate genes
Candidate gene	Homologous gene in Arabidopsis thaliana	Gene Symbol	Entrez Gene ID	Annotation
Eucgr.A00041	AT5G17780	AT5G17780	831646	alpha/beta-Hydrolases superfamily protein
Eucgr.A00046				Alpha-helical ferredoxin
Eucgr.A00070
Eucgr.A00086
Eucgr.A00087	AT2G43280	AT2G43280	818930	Far-red impaired responsive (FAR1) family protein
Eucgr.A00097	AT1G06040	STO	837113	B-box zinc finger family protein
Eucgr.A00124
Eucgr.A00129
Eucgr.A00131
Eucgr.A00132
Eucgr.A00136
Eucgr.A00137
Eucgr.A00138
Eucgr.A00140
Eucgr.A00188	AT1G24020	MLP423	839014	MLP-like protein 423
Eucgr.A00195	AT5G49320	AT5G49320	834992	Protein of unknown function (DUF1218)
Eucgr.A00199	AT3G58650	TRM7	825034
Eucgr.A00205	AT3G62560	AT3G62560	825430	Ras-related small GTP-binding family protein
Eucgr.A00283	AT4G22720	AT4G22720	828368	Actin-like ATPase superfamily protein
Eucgr.A00291	ATCG00650			ribosomal protein S18
Eucgr.A00294
Eucgr.A00307	AT3G24490	AT3G24490	822039	Alcohol dehydrogenase transcription factor Myb/SANT-like family protein
Eucgr.A00308	AT5G19590	AT5G19590	832079	Protein of unknown function, DUF538
Eucgr.A00322	AT1G05610	APS2	837066	ADP-glucose pyrophosphorylase small subunit 2
Eucgr.A00328	AT3G62560	AT3G62560	825430	Ras-related small GTP-binding family protein
Eucgr.A00395	AT2G44160	MTHFR2	819022	methylenetetrahydrofolate reductase 2
Eucgr.A00407	AT3G59920	GDI2	825162	guanosine nucleotide diphosphate dissociation inhibitor 1
Eucgr.A00408	AT3G59920	GDI2	825162	RAB GDP dissociation inhibitor 2
Eucgr.A00411	AT1G05610	APS2	837066	ADP-glucose pyrophosphorylase small subunit 2
Eucgr.A00421	AT3G59880	AT3G59880	825158
Eucgr.A00477	AT1G13570	AT1G13570	837918	F-box/RNI-like superfamily protein
Eucgr.A00480	AT1G13570	AT1G13570	837918	F-box/RNI-like superfamily protein
Eucgr.A00488	AT5G42620	AT5G42620	834269	metalloendopeptidases;zinc ion binding
Eucgr.A00491	AT5G42610	AT5G42610	834268	Protein of unknown function (DUF607)
Eucgr.A00686	AT2G38370	AT2G38370	818418	Plant protein of unknown function (DUF827)
Eucgr.A00696	AT1G45616	RLP6	841101	receptor like protein 6
Eucgr.A00697	AT2G35040	AT2G35040	818069	AICARFT/IMPCHase bienzyme family protein
Eucgr.A00708	AT2G35040	AT2G35040	818069	AICARFT/IMPCHase bienzyme family protein
Eucgr.A00709	AT5G45820	CIPK20	834622	CBL-interacting protein kinase 15
Eucgr.A00713	AT1G06920	OFP4	837202	ovate family protein 1
Eucgr.A00714	AT3G51630	WNK5	824326	with no lysine (K) kinase 5
Eucgr.A00726	AT5G01890	AT5G01890	831677	Leucine-rich receptor-like protein kinase family protein
Eucgr.A00733	AT2G35040	AT2G35040	818069	AICARFT/IMPCHase bienzyme family protein
Eucgr.A00738	AT3G53700	MEE40	824537	Pentatricopeptide repeat (PPR) superfamily protein
Eucgr.A00740	AT3G08760	ATSIK	820023	Protein kinase superfamily protein
Eucgr.A00742
Eucgr.A00766	AT5G52510	SCL8	835327	SCARECROW-like 8
Eucgr.A00776	AT5G01910	AT5G01910	831775
Eucgr.A00782	AT3G51550	FER	824318	Malectin/receptor-like protein kinase family protein
Eucgr.A00791	AT2G38600	AT2G38600	818442	HAD superfamily, subfamily IIIB acid phosphatase
Eucgr.A00793	AT3G08570	AT3G08570	820004	Phototropic-responsive NPH3 family protein
Eucgr.A00800	AT2G15690	AT2G15690	816062	Tetratricopeptide repeat (TPR)-like superfamily protein
Eucgr.A00811
Eucgr.A00836	AT1G63130	AT1G63130	842617	Tetratricopeptide repeat (TPR)-like superfamily protein
Eucgr.A00840	AT1G62930	RPF3	842594	Pentatricopeptide repeat (PPR) superfamily protein
Eucgr.A00844	AT1G12300	AT1G12300	837784	ATP binding;nucleic acid binding;helicases
Eucgr.A00851
Eucgr.A00877	AT2G38640	AT2G38640	818446	Protein of unknown function (DUF567)
Eucgr.A00879	AT5G01020	AT5G01020	831918	Protein kinase superfamily protein
Eucgr.A00880	AT1G80120	AT1G80120	844352	Protein of unknown function (DUF567)
Eucgr.A00881	AT2G38650	GAUT7	818447	galacturonosyltransferase 7
Eucgr.A00882	AT1G79620	AT1G79620	844301	Leucine-rich repeat protein kinase family protein
Eucgr.A00890	AT1G06650	AT1G06650	837175	2-oxoglutarate (2OG) and Fe(II)-dependent oxygenase superfamily protein
Eucgr.A00919	AT3G21760	HYR1	821730	UDP-Glycosyltransferase superfamily protein
Eucgr.A00934	AT3G21760	HYR1	821730	UDP-Glycosyltransferase superfamily protein
Eucgr.A00950	AT1G79480	AT1G79480	844286	Carbohydrate-binding X8 domain superfamily protein
Eucgr.A01042	AT5G35750	HK2	833552	histidine kinase 2
Eucgr.A01053	AT2G04880	ZAP1	815035	zinc-dependent activator protein-1
Eucgr.A01055	AT5G55560	AT5G55560	835650	Protein kinase superfamily protein
Eucgr.A01066	AT2G04842	EMB2761	815029	threonyl-tRNA synthetase, putative / threonine--tRNA ligase, putative
Eucgr.A01069
Eucgr.A01071	AT3G07870	AT3G07870	819978	F-box and associated interaction domains-containing protein
Eucgr.A01075	AT5G55390	EDM2	835632	ENHANCED DOWNY MILDEW 2
Eucgr.A01077	AT3G07890	AT3G07890	819980	Ypt/Rab-GAP domain of gyp1p superfamily protein
Eucgr.A01081	AT5G35670	iqd33	833540	IQ-domain 33
Eucgr.A01082	AT2G04520	AT2G04520	814994	Nucleic acid-binding, OB-fold-like protein
Eucgr.A01089	AT5G14180	MPL1	831268	Myzus persicae-induced lipase 1
Eucgr.A01091	AT1G50640	ERF3	841486	ethylene responsive element binding factor 3
Eucgr.A01094	AT1G05000	PFA-DSP1	839348	Phosphotyrosine protein phosphatases superfamily protein
Eucgr.A01095	AT2G05790	AT2G05790	815130	O-Glycosyl hydrolases family 17 protein
Eucgr.A01107	AT2G32590	EMB2795	817819
Eucgr.A01110	AT1G05100	MAPKKK18	839324	mitogen-activated protein kinase kinase kinase 18
Eucgr.A01118	AT1G76160	sks5	843948	SKU5 similar 5
Eucgr.A01119	AT1G11790	ADT1	837725	arogenate dehydratase 1
Eucgr.A01126	AT4G35830	ACO1	829737	aconitase 1
Eucgr.A01299
Eucgr.A01315	AT3G16850	AT3G16850	820938	Pectin lyase-like superfamily protein
Eucgr.A01317	AT4G16060	AT4G16060	827291
Eucgr.A01333	AT4G08850	AT4G08850	826456	Leucine-rich repeat receptor-like protein kinase family protein
Eucgr.A01377	AT2G04160	AIR3	814953	Subtilisin-like serine endopeptidase family protein
Eucgr.A01380	AT2G04160	AIR3	814953	Subtilisin-like serine endopeptidase family protein
Eucgr.A01383	AT4G12680	AT4G12680	826880
Eucgr.A01384	AT5G03795	AT5G03795	3770626	Exostosin family protein
Eucgr.A01413
Eucgr.A01417	AT1G01110	IQD18	839394	IQ-domain 17
Eucgr.A01421	AT2G46680	HB-7	819280	homeobox 7
Eucgr.A01436	AT1G76940	AT1G76940	844029	nucleotide binding;nucleic acid binding
Eucgr.A01437	AT4G27745	AT4G27745	3770406	Yippee family putative zinc-binding protein
Eucgr.A01445	AT5G24318	AT5G24318	3770717	O-Glycosyl hydrolases family 17 protein
Eucgr.A01453	AT2G24520	HA5	816988	H(+)-ATPase 5
Eucgr.A01461	AT5G53420	AT5G53420	835423	CCT motif family protein
Eucgr.A01467	AT5G06160	ATO	830503	splicing factor-related
Eucgr.A01470	AT1G66910	AT1G66910	843009	receptor serine/threonine kinase, putative
Eucgr.A01473	AT5G53110	AT5G53110	835391	RING/U-box superfamily protein
Eucgr.A01474	AT1G66910	AT1G66910	843009	Protein kinase superfamily protein
Eucgr.A01478	AT4G18250	AT4G18250	827551	PR5-like receptor kinase
Eucgr.A01494
Eucgr.A01495	AT5G53160	RCAR3	835397	regulatory components of ABA receptor 3
Eucgr.A01497	AT5G53190	SWEET3	835400	Nodulin MtN3 family protein
Eucgr.A01502	AT2G36290	AT2G36290	818200	alpha/beta-Hydrolases superfamily protein
Eucgr.A01512	AT3G52780	PAP20	824444	Purple acid phosphatases superfamily protein
Eucgr.A01516	AT3G52820	PAP22	824448	purple acid phosphatase 22
Eucgr.A01530	AT2G36380	ABCG34	818211	pleiotropic drug resistance 6
Eucgr.A01531	AT3G09970	AT3G09970	820158	Calcineurin-like metallo-phosphoesterase superfamily protein
Eucgr.A01541	AT3G44735	PSK3	823603	PHYTOSULFOKINE 3 PRECURSOR
Eucgr.A01572	AT1G21200	AT1G21200	838715	sequence-specific DNA binding transcription factors
Eucgr.A01580	AT2G36630	AT2G36630	818235	Sulfite exporter TauE/SafE family protein
Eucgr.A01592	AT2G36670	AT2G36670	818239	Eukaryotic aspartyl protease family protein
Eucgr.A01622	AT5G03510	AT5G03510	831818	C2H2-type zinc finger family protein
Eucgr.A01712	AT3G21700	SGP2	821724	Ras-related small GTP-binding family protein
Eucgr.A01720	AT1G01380	ETC1	838096	Homeodomain-like superfamily protein
Eucgr.A01732	AT3G22060	AT3G22060	821768	Receptor-like protein kinase-related family protein
Eucgr.A01735	AT4G15200	FH3	827184	formin 3
Eucgr.A01744	AT4G03230	AT4G03230	828018	S-locus lectin protein kinase family protein
Eucgr.A01749	AT4G03230	AT4G03230	828018	S-locus lectin protein kinase family protein
Eucgr.A01768	AT4G03270	CYCD6;1	828000	Cyclin D6;1
Eucgr.A01769	AT4G03280	PETC	827996	photosynthetic electron transfer C
Eucgr.A01786	AT2G20830	AT2G20830	816615	transferases;folic acid binding
Eucgr.A01787	AT1G03520	AT1G03520	839471	Core-2/I-branching beta-1,6-N-acetylglucosaminyltransferase family protein
Eucgr.A01789
Eucgr.A01794	AT1G03610	AT1G03610	838961	Protein of unknown function (DUF789)
Eucgr.A01798	AT1G036202			ELMO/CED-12 family protein
Eucgr.A01805	AT2G20770	GCL2	816606	GCR2-like 2
Eucgr.A01815	AT5G56170	LLG1	835716	LORELEI-LIKE-GPI-ANCHORED PROTEIN 1
Eucgr.A01833	AT4G28390	AAC3	828955	ADP/ATP carrier 3
Eucgr.A01834	AT2G20635	AT2G20635	816591	ATP binding;protein kinases;protein serine/threonine kinases
Eucgr.A01835	AT1G03780	TPX2	839140	targeting protein for XKLP2
Eucgr.A01851	AT4G29750	AT4G29750	829097	CRS1 / YhbY (CRM) domain-containing protein
Eucgr.A01854	AT2G20590	AT2G20590	816582	Reticulon family protein
Eucgr.A01856	AT2G33850	AT2G33850	817954
Eucgr.A01861	AT2G20560	AT2G20560	816578	DNAJ heat shock family protein
Eucgr.A01913	AT2G42590	GRF9	818859	general regulatory factor 9
Eucgr.A01918	AT3G58630	AT3G58630	825032	sequence-specific DNA binding transcription factors
Eucgr.A01928	AT4G26140	BGAL12	828720	beta-galactosidase 12
Eucgr.A01934	AT3G58720	AT3G58720	825041	RING/U-box superfamily protein
Eucgr.A01936	AT1G78830	AT1G78830	844220	Curculin-like (mannose-binding) lectin family protein
Eucgr.A01937	AT3G58720	AT3G58720	825041	RING/U-box superfamily protein
Eucgr.A01948	AT5G45710	RHA1	834610	winged-helix DNA-binding transcription factor family protein
Eucgr.A01960
Eucgr.A01962	AT3G58790	GAUT15	825048	galacturonosyltransferase 15
Eucgr.A01970				phy rapidly regulated 2
Eucgr.A02012	AT1G06475	AT1G06475	2745744
Eucgr.A02014	AT5G50890	AT5G50890	835161	alpha/beta-Hydrolases superfamily protein
Eucgr.A02197	AT1G68570	AT1G68570	843186	Major facilitator superfamily protein
Eucgr.A02215	AT1G28110	SCPL45	839704	serine carboxypeptidase-like 45
Eucgr.A02216	AT4G38690	AT4G38690	830025	PLC-like phosphodiesterases superfamily protein
Eucgr.A02240	AT3G12250	TGA6	820405	TGACG motif-binding factor 6
Eucgr.A02242	AT3G56710	SIB1	824838	sigma factor binding protein 1
Eucgr.A02262	AT3G57060	AT3G57060	824873	binding
Eucgr.A02268	AT2G41370	BOP2	818735	Ankyrin repeat family protein / BTB/POZ domain-containing protein
Eucgr.A02270	AT3G10200	AT3G10200	820182	S-adenosyl-L-methionine-dependent methyltransferases superfamily protein
Eucgr.A02273	AT3G59210	AT3G59210	825090	F-box/RNI-like superfamily protein
Eucgr.A02287	AT5G04040	SDP1	830283	Patatin-like phospholipase family protein
Eucgr.A02290	AT3G57170	AT3G57170	824884	N-acetylglucosaminyl transferase component family protein / Gpi1 family protein
Eucgr.A02295	AT3G08550	KOB1	820002	elongation defective 1 protein / ELD1 protein
Eucgr.A02309	AT3G10300	AT3G10300	820192	Calcium-binding EF-hand family protein
Eucgr.A02332	AT2G41640	AT2G41640	818762	Glycosyltransferase family 61 protein
Eucgr.A02346	AT2G41760	AT2G41760	818775
Eucgr.A02362	AT2G41810	AT2G41810	818780	Protein of unknown function, DUF642
Eucgr.A02374	AT3G57520	SIP2	824919	seed imbibition 2
Eucgr.A02380	AT3G57550	AGK2	824922	guanylate kinase
Eucgr.A02410	AT5G06940	AT5G06940	830585	Leucine-rich repeat receptor-like protein kinase family protein
Eucgr.A02416	AT3G57830	AT3G57830	824952	Leucine-rich repeat protein kinase family protein
Eucgr.A02435	AT5G06850	FTIP1	830576	C2 calcium/lipid-binding plant phosphoribosyltransferase family protein
Eucgr.A02444	AT5G06800	AT5G06800	830570	myb-like HTH transcriptional regulator family protein
Eucgr.A02462	AT5G06710	HAT14	830560	homeobox from Arabidopsis thaliana
Eucgr.A02674	AT3G59140	ABCC10	825083	multidrug resistance-associated protein 14
Eucgr.A02687	AT2G46150	AT2G46150	819222	Late embryogenesis abundant (LEA) hydroxyproline-rich glycoprotein family
Eucgr.A02706	AT3G16520	UGT88A1	820900	UDP-glucosyl transferase 88A1
Eucgr.A02727	AT1G01490	AT1G01490	839440	Copper transport protein family
Eucgr.A02728	AT1G01490	AT1G01490	839440	Heavy metal transport/detoxification superfamily protein
Eucgr.A02761	AT1G02260	AT1G02260	839344	Divalent ion symporter
Eucgr.A02885	AT1G23210	GH9B6	838930	glycosyl hydrolase 9B6
Eucgr.A02927	AT5G07480	KUOX1	830640	KAR-UP oxidoreductase 1
Eucgr.B00021	AT5G64970	AT5G64970	836621	Mitochondrial substrate carrier family protein
Eucgr.B00027	AT1G78230	AT1G78230	844159	Outer arm dynein light chain 1 protein
Eucgr.B00029	AT1G22330	AT1G22330	838839	RNA-binding (RRM/RBD/RNP motifs) family protein
Eucgr.B00050	AT4G40080	AT4G40080	830171	ENTH/ANTH/VHS superfamily protein
Eucgr.B00054	AT5G65380	AT5G65380	836663	MATE efflux family protein
Eucgr.B00094	AT1G08510	FATB	837372	fatty acyl-ACP thioesterases B
Eucgr.B00111	AT3G48540	AT3G48540	824013	Cytidine/deoxycytidylate deaminase family protein
Eucgr.B00627	AT1G74110	CYP78A10	843751	cytochrome P450, family 78, subfamily A, polypeptide 10
Eucgr.B00628	AT3G02210	COBL1	821245	COBRA-like protein 1 precursor
Eucgr.B00637	AT5G08100	ASPGA1	830704	N-terminal nucleophile aminohydrolases (Ntn hydrolases) superfamily protein
Eucgr.B00649	AT1G73880	UGT89B1	843725	UDP-glucosyl transferase 89B1
Eucgr.B00655	AT1G73880	UGT89B1	843725	UDP-glucosyl transferase 89B1
Eucgr.B00664	AT1G18490	AT1G18490	838430	Protein of unknown function (DUF1637)
Eucgr.B00668	AT1G68710	AT1G68710	843201	ATPase E1-E2 type family protein / haloacid dehalogenase-like hydrolase family protein
Eucgr.B00670	AT1G18550	AT1G18550	838436	ATP binding microtubule motor family protein
Eucgr.B00693	AT1G49000	AT1G49000	841322
Eucgr.B00697
Eucgr.B02359	AT1G13790	FDM4	837939	XH/XS domain-containing protein
Eucgr.B02377	AT3G56920	AT3G56920	824859	DHHC-type zinc finger family protein
Eucgr.B02382	AT1G07645	DSI-1VOC	2745745	dessication-induced 1VOC superfamily protein
Eucgr.B02421
Eucgr.B02437	AT2G41475	AT2G41475	6240499	Embryo-specific protein 3, (ATS3)
Eucgr.B03376	AT1G24160	AT1G24160	839029
Eucgr.B03398	AT1G10380	AT1G10380	837577	Putative membrane lipoprotein
Eucgr.B03419	AT1G14340	AT1G14340	837995	RNA-binding (RRM/RBD/RNP motifs) family protein
Eucgr.B03580	AT1G55570	sks12	842006	SKU5 similar 12
Eucgr.C00063	AT4G31230	AT4G31230	829250	Protein kinase protein with adenine nucleotide alpha hydrolases-like domain
Eucgr.C00064	AT3G42630	AT3G42630	823280	Pentatricopeptide repeat (PPR) superfamily protein
Eucgr.C00073	AT5G20590	TBL5	832181	TRICHOME BIREFRINGENCE-LIKE 5
Eucgr.C00101	AT5G57130	AT5G57130	835819	Clp amino terminal domain-containing protein
Eucgr.C00102	AT1G51590	MNS1	841584	alpha-mannosidase 1
Eucgr.C00103	AT4G26020	AT4G26020	828708
Eucgr.C00105	AT4G29930	AT4G29930	829116	basic helix-loop-helix (bHLH) DNA-binding superfamily protein
Eucgr.C00137	AT4G30160	VLN4	829139	villin 4
Eucgr.C00149	AT2G18890	AT2G18890	816405	Protein kinase superfamily protein
Eucgr.C00256
Eucgr.C00944	AT4G29160	SNF7.1	829037	SNF7 family protein
Eucgr.C00948	AT2G19810	OZF1	816500	CCCH-type zinc finger family protein
Eucgr.C00949	AT2G19800	MIOX2	816499	myo-inositol oxygenase 2
Eucgr.C00958	AT4G29230	NAC075	829044	NAC domain containing protein 75
Eucgr.C00979	AT5G25930	AT5G25930	832662	Protein kinase family protein with leucine-rich repeat domain
Eucgr.C00983	AT4G29130	HXK1	829034	hexokinase 2
Eucgr.D00184	AT2G34710	PHB	818036	Homeobox-leucine zipper family protein / lipid-binding START domain-containing protein
Eucgr.D00192	AT4G21120	AAT1	827860	amino acid transporter 1
Eucgr.D00196	AT1G30450	CCC1	839924	cation-chloride co-transporter 1
Eucgr.D00197	AT1G30440	AT1G30440	839923	Phototropic-responsive NPH3 family protein
Eucgr.D00224	AT2G34660	ABCC2	818031	multidrug resistance-associated protein 2
Eucgr.D00225	AT1G30410	ABCC12	839921	multidrug resistance-associated protein 12
Eucgr.D00253	AT1G30370	DLAH	839917	alpha/beta-Hydrolases superfamily protein
Eucgr.D00260	AT1G30360	ERD4	839916	Early-responsive to dehydration stress protein (ERD4)
Eucgr.D00265	AT1G30320	AT1G30320	839912	Remorin family protein
Eucgr.D00282	AT2G43190	POP4	818920	ribonuclease P family protein
Eucgr.D00287	AT5G46180	DELTA-OAT	834660	ornithine-delta-aminotransferase
Eucgr.D00293	AT1G30080	AT1G30080	839887	Glycosyl hydrolase superfamily protein
Eucgr.D00300	AT4G18270	TRANS11	827553	translocase 11
Eucgr.D00315	AT1G53530	AT1G53530	841788	Peptidase S24/S26A/S26B/S26C family protein
Eucgr.D00324	AT4G18220	AT4G18220	827548	purine permease 10
Eucgr.D00339	AT1G29820	AT1G29820	839860	Magnesium transporter CorA-like family protein
Eucgr.D00342	AT4G18130	PHYE	827538	phytochrome E
Eucgr.D00343	AT5G46420	AT5G46420	834685	16S rRNA processing protein RimM family
Eucgr.D00344	AT5G46530	AT5G46530	834696	AWPM-19-like family protein
Eucgr.D00351	AT4G18040	EIF4E	827529	eukaryotic translation initiation factor 4E
Eucgr.D00388
Eucgr.D00389	AT4G19080	AT4G19080	827646	Protein of unknown function (DUF594)
Eucgr.D00400	AT5G45540	AT5G45540	834590	Protein of unknown function (DUF594)
Eucgr.D00406	AT1G29640	AT1G29640	839841	Protein of unknown function, DUF584
Eucgr.D00652	AT1G51700	DOF1	841595	OBF binding protein 4
Eucgr.D00677	AT1G61120	TPS04	842405	terpene synthase 04
Eucgr.D00689	AT1G61720	BAN	842469	NAD(P)-binding Rossmann-fold superfamily protein
Eucgr.D00708	AT4G05000	VPS28-2	825842	Vacuolar protein sorting-associated protein VPS28 family protein
Eucgr.D00723
Eucgr.D00755	AT4G05120	FUR1	825857	Major facilitator superfamily protein
Eucgr.D00758	AT4G05120	FUR1	825857	Major facilitator superfamily protein
Eucgr.D00762	AT4G05150	AT4G05150	825863	Octicosapeptide/Phox/Bem1p family protein
Eucgr.D00811	AT5G45540	AT5G45540	834590	Protein of unknown function (DUF594)
Eucgr.D00819	AT4G05220	AT4G05220	825870	Late embryogenesis abundant (LEA) hydroxyproline-rich glycoprotein family
Eucgr.D00820
Eucgr.D00829	AT4G05200	CRK25	825868	cysteine-rich RLK (RECEPTOR-like protein kinase) 25
Eucgr.D00831	AT4G05200	CRK25	825868	cysteine-rich RLK (RECEPTOR-like protein kinase) 25
Eucgr.D00835	AT4G38830	CRK26	830038	cysteine-rich RLK (RECEPTOR-like protein kinase) 26
Eucgr.D00883	AT4G21350	PUB8	827885	plant U-box 8
Eucgr.D00912	AT1G11340	AT1G11340	837676	S-locus lectin protein kinase family protein
Eucgr.D00917	AT1G11340	AT1G11340	837676	receptor kinase 2
Eucgr.D01045
Eucgr.D01050	AT5G58240	FHIT	835936	FRAGILE HISTIDINE TRIAD
Eucgr.D01062
Eucgr.D01065	AT1G54730	AT1G54730	841914	Major facilitator superfamily protein
Eucgr.D01072
Eucgr.D01087	AT4G37980	ELI3-1	829954	elicitor-activated gene 3-1
Eucgr.D01111
Eucgr.D01123	AT3G17350	AT3G17350	820998
Eucgr.D01126	AT4G02600	MLO1	828229	Seven transmembrane MLO family protein
Eucgr.D01127	AT4G17800	AT4G17800	827502	Predicted AT-hook DNA-binding family protein
Eucgr.D01134	AT1G05160	CYP88A3	839311	cytochrome P450, family 88, subfamily A, polypeptide 3
Eucgr.D01135	AT2G02390	GSTZ1	814770	glutathione S-transferase zeta 1
Eucgr.D01137	AT5G58230	MSI1	835935	Transducin/WD40 repeat-like superfamily protein
Eucgr.D01147	ATCG00040			maturase K
Eucgr.D01165	AT5G26667	PYR6	832710	P-loop containing nucleoside triphosphate hydrolases superfamily protein
Eucgr.D01176
Eucgr.D01188	AT5G47070	AT5G47070	834753	Protein kinase superfamily protein
Eucgr.D01201	AT3G61220	SDR1	825294	NAD(P)-binding Rossmann-fold superfamily protein
Eucgr.D01202	AT2G44690	ARAC9	819077	Arabidopsis RAC-like 9
Eucgr.D01226	AT2G44810	DAD1	819090	alpha/beta-Hydrolases superfamily protein
Eucgr.D01232	AT4G03500	AT4G03500	827731	Ankyrin repeat family protein
Eucgr.D01234	AT4G03500	AT4G03500	827731	Ankyrin repeat family protein
Eucgr.D01235	AT4G03500	AT4G03500	827731	Ankyrin repeat family protein
Eucgr.D01261	AT4G03500	AT4G03500	827731	Ankyrin repeat family protein
Eucgr.D01267	AT4G03500	AT4G03500	827731	Ankyrin repeat family protein
Eucgr.D01295	AT1G11570	NTL	837700	NTF2-like
Eucgr.D01315	AT3G21690	AT3G21690	821723	MATE efflux family protein
Eucgr.D01500	AT5G45480	AT5G45480	834584	Protein of unknown function (DUF594)
Eucgr.D01540	AT3G60340	AT3G60340	825205	alpha/beta-Hydrolases superfamily protein
Eucgr.D01642	AT3G58810	MTPA2	825050	zinc transporter of Arabidopsis thaliana
Eucgr.D01898	AT4G11650	OSM34	826770	osmotin 34
Eucgr.D01917	AT1G63100	AT1G63100	842613	GRAS family transcription factor
Eucgr.D01926	AT1G12600	AT1G12600	837816	UDP-galactose transporter 2
Eucgr.D01931	AT4G11820	HMGS	826788	hydroxymethylglutaryl-CoA synthase / HMG-CoA synthase / 3-hydroxy-3-methylglutaryl coenzyme A synthase
Eucgr.D01942	AT4G22900	AT4G22900	828389	Protein of unknown function (DUF1191)
Eucgr.D01956	AT2G45550	CYP76C4	819163	cytochrome P450, family 76, subfamily C, polypeptide 4
Eucgr.D01977	AT1G12390	AT1G12390	837794	Cornichon family protein
Eucgr.D01981
Eucgr.D01996	AT4G12290	AT4G12290	826838	Copper amine oxidase family protein
Eucgr.D02025	AT1G62710	BETA-VPE	842569	beta vacuolar processing enzyme
Eucgr.D02043	AT2G45180	AT2G45180	819126	Bifunctional inhibitor/lipid-transfer protein/seed storage 2S albumin superfamily protein
Eucgr.D02046	AT4G17260	AT4G17260	827440	Lactate/malate dehydrogenase family protein
Eucgr.D02053
Eucgr.D02056	AT4G17250	AT4G17250	827439
Eucgr.D02064	AT3G02065	AT3G02065	821155	P-loop containing nucleoside triphosphate hydrolases superfamily protein
Eucgr.D02066	AT4G17250	AT4G17250	827439
Eucgr.D02072	AT1G04110	SDD1	839287	Subtilase family protein
Eucgr.D02086	AT5G47470	UMAMIT7	834797	Nodulin MtN21 /EamA-like transporter family protein
Eucgr.D02088	AT4G16640	AT4G16640	827365	Matrixin family protein
Eucgr.D02090	AT5G47450	TIP2;3	834794	tonoplast intrinsic protein 2;3
Eucgr.D02106	AT5G45500	AT5G45500	834586	Leucine-rich repeat (LRR) family protein
Eucgr.D02122	AT5G02890	AT5G02890	831751	HXXXD-type acyl-transferase family protein
Eucgr.D02124	AT4G17540	AT4G17540	827469
Eucgr.D02127	AT4G16970	AT4G16970	827405	Protein kinase superfamily protein
Eucgr.D02135	AT4G33950	OST1	829541	Protein kinase superfamily protein
Eucgr.D02142	AT4G17140	AT4G17140	827424	pleckstrin homology (PH) domain-containing protein
Eucgr.D02164	AT1G65180	AT1G65180	842825	Cysteine/Histidine-rich C1 domain family protein
Eucgr.D02167	AT1G32450	NRT1.5	840139	nitrate transporter 1.5
Eucgr.D02190	AT4G17830	AT4G17830	827506	Peptidase M20/M25/M40 family protein
Eucgr.D02205	AT1G32690	AT1G32690	840163
Eucgr.D02206	AT4G17900	AT4G17900	827514	PLATZ transcription factor family protein
Eucgr.D02212	AT5G46840	AT5G46840	834728	RNA-binding (RRM/RBD/RNP motifs) family protein
Eucgr.D02218	AT5G46860	VAM3	834730	Syntaxin/t-SNARE family protein
Eucgr.D02220	AT1G32250	AT1G32250	840117	Calcium-binding EF-hand family protein
Eucgr.D02225	AT1G32240	KAN2	840116	Homeodomain-like superfamily protein
Eucgr.D02227	AT1G32220	AT1G32220	840114	NAD(P)-binding Rossmann-fold superfamily protein
Eucgr.D02228	AT3G03050	CSLD3	821148	cellulose synthase-like D3
Eucgr.D02229	AT1G32170	XTH30	840109	xyloglucan endotransglucosylase/hydrolase 30
Eucgr.D02230	AT2G35540	AT2G35540	818119	DNAJ heat shock N-terminal domain-containing protein
Eucgr.D02240	AT2G45720	AT2G45720	819180	ARM repeat superfamily protein
Eucgr.D02253	AT3G61220	SDR1	825294	NAD(P)-binding Rossmann-fold superfamily protein
Eucgr.D02258	AT3G61220	SDR1	825294	NAD(P)-binding Rossmann-fold superfamily protein
Eucgr.D02260	AT3G61220	SDR1	825294	NAD(P)-binding Rossmann-fold superfamily protein
Eucgr.D02269	AT2G38040	CAC3	818382	acetyl Co-enzyme a carboxylase carboxyltransferase alpha subunit
Eucgr.D02272	AT5G23750	AT5G23750	832440	Remorin family protein
Eucgr.D02290	AT4G00460	ROPGEF3	827967	RHO guanyl-nucleotide exchange factor 3
Eucgr.D02318	AT2G46090	LCBK2	819217	Diacylglycerol kinase family protein
Eucgr.D02336	AT5G41620	AT5G41620	834164
Eucgr.D02346	AT4G27940	MTM1	828907	manganese tracking factor for mitochondrial SOD2
Eucgr.D02351	AT4G01070	GT72B1	827912	UDP-Glycosyltransferase superfamily protein
Eucgr.D02358	AT5G42800	DFR	834291	dihydroflavonol 4-reductase
Eucgr.D02364	AT1G01360	RCAR1	838452	regulatory component of ABA receptor 1
Eucgr.D02381	AT1G01300	AT1G01300	839375	Eukaryotic aspartyl protease family protein
Eucgr.D02391	AT3G18750	WNK6	821406	with no lysine (K) kinase 6
Eucgr.D02397	AT2G45690	SSE1	819177	shrunken seed protein (SSE1)
Eucgr.D02434	AT1G08500	ENODL18	837371	early nodulin-like protein 18
Eucgr.D02442	AT2G45490	AUR3	819157	ataurora3
Eucgr.D02450	AT3G60850	AT3G60850	825256
Eucgr.E00372	AT4G16820	PLA-I{beta]2	827388	alpha/beta-Hydrolases superfamily protein
Eucgr.E00383	AT4G19050	AT4G19050	827643	NB-ARC domain-containing disease resistance protein
Eucgr.E00386	AT2G21840	AT2G21840	816720	Cysteine/Histidine-rich C1 domain family protein
Eucgr.E00387	AT4G19060	AT4G19060	827644	P-loop containing nucleoside triphosphate hydrolases superfamily protein
Eucgr.E00391	AT4G19060	AT4G19060	827644	P-loop containing nucleoside triphosphate hydrolases superfamily protein
Eucgr.E00393	AT2G21840	AT2G21840	816720	DC1 domain-containing protein
Eucgr.E00397	AT5G47360	AT5G47360	834783	Tetratricopeptide repeat (TPR)-like superfamily protein
Eucgr.E00399	AT4G16790	AT4G16790	827385	hydroxyproline-rich glycoprotein family protein
Eucgr.E00412	AT5G47380	AT5G47380	834785	Protein of unknown function, DUF547
Eucgr.E00425	AT5G47500	PME5	834800	Pectin lyase-like superfamily protein
Eucgr.E00432	AT3G60600	VAP27-1	825231	vesicle associated protein
Eucgr.E00433	AT4G25200	HSP23.6-MITO	828623	mitochondrion-localized small heat shock protein 23.6
Eucgr.E00937
Eucgr.E00956	AT4G10890	AT4G10890	826688
Eucgr.E00975	AT1G50180	AT1G50180	841440	NB-ARC domain-containing disease resistance protein
Eucgr.E00984	AT4G08455	AT4G08455	826404	BTB/POZ domain-containing protein
Eucgr.E00985	AT4G08455	AT4G08455	826404	BTB/POZ domain-containing protein
Eucgr.E01000
Eucgr.E01002	AT4G01170	AT4G01170	826561
Eucgr.E01007	AT5G20240	PI	832146	K-box region and MADS-box transcription factor family protein
Eucgr.E01011	AT5G09220	AAP2	830781	amino acid permease 2
Eucgr.F00192	AT1G46768	RAP2.1	841117	related to AP2 1
Eucgr.F00206	AT5G67090	AT5G67090	836844	Subtilisin-like serine endopeptidase family protein
Eucgr.F00207	AT5G67090	AT5G67090	836844	Subtilisin-like serine endopeptidase family protein
Eucgr.F00233	AT1G18210	AT1G18210	838401	Calcium-binding EF-hand family protein
Eucgr.F00234	AT5G42380	CML37	834244	calmodulin like 37
Eucgr.F00235	AT5G42380	CML37	834244	calmodulin like 37
Eucgr.F00237	AT5G42750	BKI1	834284	BRI1 kinase inhibitor 1
Eucgr.F01231	AT1G55740	SIP1	842023	seed imbibition 1
Eucgr.F01235	AT1G78860	AT1G78860	844223	D-mannose binding lectin protein with Apple-like carbohydrate-binding domain
Eucgr.F01237	AT1G78860	AT1G78860	844223	D-mannose binding lectin protein with Apple-like carbohydrate-binding domain
Eucgr.F01247	AT1G78780	AT1G78780	844214	pathogenesis-related family protein
Eucgr.F01287	AT5G17680	AT5G17680	831634	disease resistance protein (TIR-NBS-LRR class), putative
Eucgr.F01288	AT5G36930	AT5G36930	833662	Disease resistance protein (TIR-NBS-LRR class) family
Eucgr.F01296	AT1G78680	GGH2	844204	gamma-glutamyl hydrolase 2
Eucgr.F01302	AT1G53440	AT1G53440	841779	Leucine-rich repeat transmembrane protein kinase
Eucgr.F01305	AT1G53430	AT1G53430	841778	Leucine-rich repeat transmembrane protein kinase
Eucgr.F01377	AT1G78530	AT1G78530	844189	Protein kinase superfamily protein
Eucgr.F01386	AT3G14690	CYP72A15	820697	cytochrome P450, family 72, subfamily A, polypeptide 15
Eucgr.F01387	AT3G14690	CYP72A15	820697	cytochrome P450, family 72, subfamily A, polypeptide 15
Eucgr.F01396	AT3G14690	CYP72A15	820697	cytochrome P450, family 72, subfamily A, polypeptide 15
Eucgr.F01402	AT1G53590	NTMC2T6.1	841794	Calcium-dependent lipid-binding (CaLB domain) family protein
Eucgr.F01403	AT3G14570	GSL04	820683	glucan synthase-like 4
Eucgr.F01409	AT3G14440	NCED3	820667	nine-cis-epoxycarotenoid dioxygenase 3
Eucgr.F01455	AT5G45030	AT5G45030	834534	Trypsin family protein
Eucgr.F01466	AT3G12890	ASML2	820472	activator of spomin::LUC2
Eucgr.F01469	AT1G53720	CYP59	841810	cyclophilin 59
Eucgr.F01479	AT1G79380	RGLG4	844276	Ca(2)-dependent phospholipid-binding protein (Copine) family
Eucgr.F01501	AT1G55200	AT1G55200	841963	Protein kinase protein with adenine nucleotide alpha hydrolases-like domain
Eucgr.F01503
Eucgr.F01513
Eucgr.F01515
Eucgr.F01519
Eucgr.F01530	AT3G50770	CML41	824241	calmodulin-like 41
Eucgr.F01538	AT5G07680	NAC080	830661	NAC domain containing protein 58
Eucgr.F01543	AT1G01420	UGT72B3	837503	UDP-glucosyl transferase 72B3
Eucgr.F01563	AT4G34480	AT4G34480	829599	O-Glycosyl hydrolases family 17 protein
Eucgr.F01565
Eucgr.F01847	AT1G75500	WAT1	843886	Walls Are Thin 1
Eucgr.F01868	AT1G27660	AT1G27660	839658	basic helix-loop-helix (bHLH) DNA-binding superfamily protein
Eucgr.F01877	AT5G66440	AT5G66440	836776
Eucgr.F01886	AT1G47271	AT1G47271	6241044	Cystathionine beta-synthase (CBS) family protein
Eucgr.F01892	AT1G75210	AT1G75210	843858	HAD-superfamily hydrolase, subfamily IG, 5\'-nucleotidase
Eucgr.F01898
Eucgr.F02049	AT5G55730	FLA1	835667	FASCICLIN-like arabinogalactan 1
Eucgr.F02058	AT1G55910	ZIP11	842041	zinc transporter 11 precursor
Eucgr.F02059	AT1G55910	ZIP11	842041	zinc transporter 11 precursor
Eucgr.F02083	AT3G13080	ABCC3	820496	multidrug resistance-associated protein 3
Eucgr.F02085	AT1G75590	AT1G75590	843894	SAUR-like auxin-responsive protein family
Eucgr.F02110	AT1G52600	AT1G52600	841692	Peptidase S24/S26A/S26B/S26C family protein
Eucgr.F02123	AT5G49970	PPOX	835061	pyridoxin (pyrodoxamine) 5\'-phosphate oxidase
Eucgr.F02140	AT5G64816	AT5G64816	836604
Eucgr.F02144
Eucgr.F02179	AT1G58340	ZF14	842203	MATE efflux family protein
Eucgr.F02182	AT5G49660	XIP1	835028	Leucine-rich repeat transmembrane protein kinase family protein
Eucgr.F02200	AT1G10030	ERG28	837538	homolog of yeast ergosterol28
Eucgr.F02231	AT1G27480	AT1G27480	839639	alpha/beta-Hydrolases superfamily protein
Eucgr.F02249	AT1G59590	ZCF37	842249	ZCF37
Eucgr.F02300	AT3G16150	ASPGB1	820860	N-terminal nucleophile aminohydrolases (Ntn hydrolases) superfamily protein
Eucgr.F02327	AT1G46264	HSFB4	841110	heat shock transcription factor B4
Eucgr.F02347	AT4G25000	AMY1	828603	alpha-amylase-like
Eucgr.F02433	AT5G65020	ANNAT2	836626	annexin 7
Eucgr.F02435	AT4G39860	AT4G39860	830145
Eucgr.F02460	AT5G35450	AT5G35450	833508	Disease resistance protein (CC-NBS-LRR class) family
Eucgr.F02468	AT5G45470	AT5G45470	834583	Protein of unknown function (DUF594)
Eucgr.F02505	AT1G68360	AT1G68360	843165	C2H2 and C2HC zinc fingers superfamily protein
Eucgr.F02525	AT1G21510	AT1G21510	838750
Eucgr.F02535	AT1G52600	AT1G52600	841692	Peptidase S24/S26A/S26B/S26C family protein
Eucgr.F02672	AT1G22750	AT1G22750	838881
Eucgr.F02691	AT2G33710	AT2G33710	817936	Integrase-type DNA-binding superfamily protein
Eucgr.F02697
Eucgr.F02701	AT1G76780	AT1G76780	844012	HSP20-like chaperones superfamily protein
Eucgr.F02706	AT1G43650	UMAMIT22	840949	nodulin MtN21 /EamA-like transporter family protein
Eucgr.F02707	AT1G76880	AT1G76880	844023	Duplicated homeodomain-like superfamily protein
Eucgr.F02708	AT4G11800	AT4G11800	826786	Calcineurin-like metallo-phosphoesterase superfamily protein
Eucgr.F02714	AT3G43660	AT3G43660	823468	Vacuolar iron transporter (VIT) family protein
Eucgr.F02715	AT1G43700	VIP1	840957	VIRE2-interacting protein 1
Eucgr.F02720	AT3G18710	PUB29	821402	plant U-box 29
Eucgr.F02725	AT1G21340	AT1G21340	838733	Dof-type zinc finger DNA-binding family protein
Eucgr.F02729	AT1G21350	AT1G21350	838734	Thioredoxin superfamily protein
Eucgr.F02730	AT1G21360	GLTP2	838735	glycolipid transfer protein 2
Eucgr.F02732	AT1G78780	AT1G78780	844214	pathogenesis-related family protein
Eucgr.F02743	AT1G43800	FTM1	840977	Plant stearoyl-acyl-carrier-protein desaturase family protein
Eucgr.F03167	AT3G13940	AT3G13940	820607	DNA binding;DNA-directed RNA polymerases
Eucgr.F03168	AT1G72790	AT1G72790	843610	hydroxyproline-rich glycoprotein family protein
Eucgr.F03335	AT5G53750	AT5G53750	835456	CBS domain-containing protein
Eucgr.F03336	AT1G52920	GPCR	841725	G protein coupled receptor
Eucgr.F03337	AT3G15470	AT3G15470	820786	Transducin/WD40 repeat-like superfamily protein
Eucgr.F03341	AT5G54440	CLUB	835532	CLUB
Eucgr.F03345	AT5G54380	THE1	835526	protein kinase family protein
Eucgr.F03356	AT5G54280	ATM2	835516	myosin 2
Eucgr.F03361	AT4G10265	AT4G10265	826618	Wound-responsive family protein
Eucgr.F03363	AT2G20900	DGK5	816624	diacylglycerol kinase 5
Eucgr.F03372	AT4G27290	AT4G27290	828837	S-locus lectin protein kinase family protein
Eucgr.F03381	AT4G27280	AT4G27280	828836	Calcium-binding EF-hand family protein
Eucgr.F03382	AT4G27290	AT4G27290	828837	S-locus lectin protein kinase family protein
Eucgr.F03384	AT3G20640	AT3G20640	821611	basic helix-loop-helix (bHLH) DNA-binding superfamily protein
Eucgr.F03386	AT5G54510	DFL1	835539	Auxin-responsive GH3 family protein
Eucgr.F03394	AT5G54570	BGLU41	835545	beta glucosidase 41
Eucgr.F03417	AT4G27250	AT4G27250	828833	NAD(P)-binding Rossmann-fold superfamily protein
Eucgr.F03480	AT5G42570	AT5G42570	834264	B-cell receptor-associated 31-like
Eucgr.F03495	AT5G55180	AT5G55180	835611	O-Glycosyl hydrolases family 17 protein
Eucgr.F03515	AT4G26690	SHV3	828776	PLC-like phosphodiesterase family protein
Eucgr.F03525	AT4G35770	SEN1	829730	Rhodanese/Cell cycle control phosphatase superfamily protein
Eucgr.F03538	AT1G76160	sks5	843948	SKU5 similar 5
Eucgr.F03544	AT2G28305	LOG1	817376	Putative lysine decarboxylase family protein
Eucgr.F03574	AT1G42540	GLR3.3	840859	glutamate receptor 3.3
Eucgr.F03575	AT5G24318	AT5G24318	3770717	O-Glycosyl hydrolases family 17 protein
Eucgr.F03590	AT1G76430	PHT1;9	843976	phosphate transporter 1;9
Eucgr.F03605	AT2G33590	CRL1	817925	NAD(P)-binding Rossmann-fold superfamily protein
Eucgr.F03609	AT1G76500	SOB3	843983	Predicted AT-hook DNA-binding family protein
Eucgr.F03617	AT1G20990	AT1G20990	838693	Cysteine/Histidine-rich C1 domain family protein
Eucgr.F03619	AT2G33570	GALS1	817922	Domain of unknown function (DUF23)
Eucgr.F03663	AT5G59810	SBT5.4	836102	Subtilase family protein
Eucgr.F03668	AT3G44730	KP1	823602	kinesin-like protein 1
Eucgr.F03672	AT4G26555	AT4G26555	828762	FKBP-like peptidyl-prolyl cis-trans isomerase family protein
Eucgr.F03707	AT1G76080	CDSP32	843940	chloroplastic drought-induced stress protein of 32 kD
Eucgr.F03757	AT1G77700	AT1G77700	844106	Pathogenesis-related thaumatin superfamily protein
Eucgr.F03778	AT4G08300	UMAMIT17	826384	nodulin MtN21 /EamA-like transporter family protein
Eucgr.F03789	AT1G44575	NPQ4	841033	Chlorophyll A-B binding family protein
Eucgr.F03820	AT1G77380	AAP3	844074	amino acid permease 3
Eucgr.F03827	AT1G77380	AAP3	844074	amino acid permease 3
Eucgr.F03841	AT1G77320	MEI1	844068	transcription coactivators
Eucgr.F03862	AT3G15730	PLDALPHA1	820816	phospholipase D alpha 1
Eucgr.F03873	AT3G15810	AT3G15810	820824	Protein of unknown function (DUF567)
Eucgr.F03878	AT1G80090	CBSX4	844349	Cystathionine beta-synthase (CBS) protein
Eucgr.F03961	AT2G07680	ABCC13	815414	multidrug resistance-associated protein 11
Eucgr.F04014	AT4G31540	EXO70G1	829281	exocyst subunit exo70 family protein G1
Eucgr.F04034	AT1G16800	AT1G16800	838251	P-loop containing nucleoside triphosphate hydrolases superfamily protein
Eucgr.F04038	AT1G78950	BAS	844234	Terpenoid cyclases family protein
Eucgr.F04055	AT3G13040	AT3G13040	820490	myb-like HTH transcriptional regulator family protein
Eucgr.F04056	AT3G55780	AT3G55780	824744	Glycosyl hydrolase superfamily protein
Eucgr.F04057	AT5G38700	AT5G38700	833860
Eucgr.F04059	AT3G13000	AT3G13000	820486	Protein of unknown function, DUF547
Eucgr.F04063
Eucgr.F04066	AT1G79020	AT1G79020	844243	Enhancer of polycomb-like transcription factor protein
Eucgr.F04077	AT3G47570	AT3G47570	823911	Leucine-rich repeat protein kinase family protein
Eucgr.F04089	AT1G33470	AT1G33470	840240	RNA-binding (RRM/RBD/RNP motifs) family protein
Eucgr.F04101	AT1G35710	AT1G35710	840475	Protein kinase family protein with leucine-rich repeat domain
Eucgr.F04109	AT4G10250	ATHSP22.0	826616	HSP20-like chaperones superfamily protein
Eucgr.F04114	AT1G72160	AT1G72160	843547	SEC14 cytosolic factor family protein / phosphoglyceride transfer family protein
Eucgr.F04124	AT1G65280	AT1G65280	842835	DNAJ heat shock N-terminal domain-containing protein
Eucgr.F04125	AT2G18420	AT2G18420	816357	GAST1 protein homolog 3
Eucgr.F04133	AT1G34420	AT1G34420	840345	leucine-rich repeat transmembrane protein kinase family protein
Eucgr.F04138	AT1G22710	SUC2	838877	sucrose-proton symporter 2
Eucgr.F04139
Eucgr.F04141	AT1G34320	AT1G34320	840333	Protein of unknown function (DUF668)
Eucgr.F04144	AT1G22710	SUC2	838877	sucrose-proton symporter 2
Eucgr.F04146	AT1G34300	AT1G34300	840330	lectin protein kinase family protein
Eucgr.F04163	AT5G09360	LAC14	830795	laccase 14
Eucgr.F04176	AT1G71697	CK1	843500	choline kinase 1
Eucgr.F04184	AT1G34060	AT1G34060	840303	Pyridoxal phosphate (PLP)-dependent transferases superfamily protein
Eucgr.F04186	AT1G34060	AT1G34060	840303	Pyridoxal phosphate (PLP)-dependent transferases superfamily protein
Eucgr.F04195	AT1G71695	AT1G71695	843498	Peroxidase superfamily protein
Eucgr.F04198	AT1G71695	AT1G71695	843498	Peroxidase superfamily protein
Eucgr.F04203	AT2G33710	AT2G33710	817936	Integrase-type DNA-binding superfamily protein
Eucgr.F04215
Eucgr.F04219
Eucgr.F04220	AT1G78955	CAMS1	844235	camelliol C synthase 1
Eucgr.F04221	AT1G12220	RPS5	837775	Disease resistance protein (CC-NBS-LRR class) family
Eucgr.F04228	AT1G12220	RPS5	837775	Disease resistance protein (CC-NBS-LRR class) family
Eucgr.F04229	AT1G76760	TY1	844010	thioredoxin Y1
Eucgr.F04244	AT1G12220	RPS5	837775	Disease resistance protein (CC-NBS-LRR class) family
Eucgr.F04249	AT1G12220	RPS5	837775	Disease resistance protein (CC-NBS-LRR class) family
Eucgr.F04256	AT1G12220	RPS5	837775	Disease resistance protein (CC-NBS-LRR class) family
Eucgr.F04257	AT1G43710	EMB1075	840958	Pyridoxal phosphate (PLP)-dependent transferases superfamily protein
Eucgr.F04265	AT1G77110	PIN6	844046	Auxin efflux carrier family protein
Eucgr.F04268	AT1G21460	SWEET1	838744	Nodulin MtN3 family protein
Eucgr.F04270	AT1G21460	SWEET1	838744	Nodulin MtN3 family protein
Eucgr.F04279	AT2G02850	ARPN	814816	plantacyanin
Eucgr.F04285	AT2G34300	AT2G34300	817991	S-adenosyl-L-methionine-dependent methyltransferases superfamily protein
Eucgr.F04286	AT5G64030	AT5G64030	836524	S-adenosyl-L-methionine-dependent methyltransferases superfamily protein
Eucgr.F04287	AT1G21270	WAK2	838723	wall associated kinase 3
Eucgr.F04301	AT1G56140	AT1G56140	842066	Leucine-rich repeat transmembrane protein kinase
Eucgr.F04309	AT1G27180	AT1G27180	839607	disease resistance protein (TIR-NBS-LRR class), putative
Eucgr.F04310	AT1G27180	AT1G27180	839607	disease resistance protein (TIR-NBS-LRR class), putative
Eucgr.F04327	AT1G77380	AAP3	844074	amino acid permease 3
Eucgr.F04329	AT1G77380	AAP3	844074	amino acid permease 3
Eucgr.F04337	AT1G15960	NRAMP6	838166	NRAMP metal ion transporter 6
Eucgr.F04341	AT1G01720	ATAF1	839265	NAC (No Apical Meristem) domain transcriptional regulator superfamily protein
Eucgr.F04353	AT1G21830	AT1G21830	838785
Eucgr.F04360	AT4G08290	UMAMIT20	826383	nodulin MtN21 /EamA-like transporter family protein
Eucgr.F04366	AT1G60360	AT1G60360	842331	RING/U-box superfamily protein
Eucgr.F04380	AT1G77850	ARF17	844120	auxin response factor 17
Eucgr.G01047	AT4G35580	NTL9	829710	NAC 014
Eucgr.G01048
Eucgr.G01049	AT4G35580	NTL9	829710	NAC transcription factor-like 9
Eucgr.G01052	AT4G17980	NAC071	827523	NAC transcription factor-like 9
Eucgr.G01053	AT4G35580	NTL9	829710	NAC transcription factor-like 9
Eucgr.G01057
Eucgr.G01060	AT4G35580	NTL9	829710	NAC transcription factor-like 9
Eucgr.G01061	AT4G35580	NTL9	829710	NAC transcription factor-like 9
Eucgr.G01063	AT4G35580	NTL9	829710	NAC transcription factor-like 9
Eucgr.G01074	AT4G35580	NTL9	829710	NAC 014
Eucgr.G01078	AT4G35580	NTL9	829710	NAC transcription factor-like 9
Eucgr.G01083	AT4G35580	NTL9	829710	NAC 014
Eucgr.G01084
Eucgr.G01090
Eucgr.G01123	AT1G09970	LRR XI-23	837531	Leucine-rich receptor-like protein kinase family protein
Eucgr.G01128
Eucgr.G01188	AT1G17870	EGY3	838366	ethylene-dependent gravitropism-deficient and yellow-green-like 3
Eucgr.G01904	AT1G12930	AT1G12930	837851	ARM repeat superfamily protein
Eucgr.G01909	AT5G13870	XTH5	831233	xyloglucan endotransglucosylase/hydrolase 5
Eucgr.G01922	AT1G12880	NUDT12	837845	nudix hydrolase homolog 12
Eucgr.G01926	AT3G19340	AT3G19340	821468	Protein of unknown function (DUF3754)
Eucgr.G02236	AT1G49540	ELP2	841378	elongator protein 2
Eucgr.G02257	AT4G08950	EXO	826473	Phosphate-responsive 1 family protein
Eucgr.G02270	AT1G35720	ANNAT1	840476	annexin 1
Eucgr.G02305
Eucgr.G02317	AT3G25920	RPL15	822189	ribosomal protein L15
Eucgr.G02324	AT1G68530	KCS6	843182	3-ketoacyl-CoA synthase 6
Eucgr.G02369	AT3G25620	ABCG21	822149	ABC-2 type transporter family protein
Eucgr.G02375
Eucgr.G02378	AT1G68740	PHO1;H1	843205	EXS (ERD1/XPR1/SYG1) family protein
Eucgr.G02393	AT3G25590	AT3G25590	822146
Eucgr.G02415	AT5G03490	AT5G03490	831823	UDP-Glycosyltransferase superfamily protein
Eucgr.G02417
Eucgr.G02420	AT1G26300	AT1G26300	839171	BSD domain-containing protein
Eucgr.G02426	AT1G69080	AT1G69080	843240	Adenine nucleotide alpha hydrolases-like superfamily protein
Eucgr.G02435	AT1G26370	AT1G26370	839179	RNA helicase family protein
Eucgr.G02436
Eucgr.G02453	AT5G46110	APE2	834652	Glucose-6-phosphate/phosphate translocator-related
Eucgr.G02456	AT1G13860	QUL1	837945	QUASIMODO2 LIKE 1
Eucgr.G02474	AT1G23870	TPS9	838998	trehalose-phosphatase/synthase 9
Eucgr.G02478	AT1G14020	AT1G14020	837963	O-fucosyltransferase family protein
Eucgr.G02490	AT1G69530	EXPA1	843288	expansin A1
Eucgr.G02514	AT1G26920	AT1G26920	839582
Eucgr.G02533	AT1G14390	AT1G14390	838001	Leucine-rich repeat protein kinase family protein
Eucgr.G02536	AT1G28110	SCPL45	839704	serine carboxypeptidase-like 42
Eucgr.G02576	AT5G23160	AT5G23160	832380
Eucgr.G02588	AT3G19970	AT3G19970	821535	alpha/beta-Hydrolases superfamily protein
Eucgr.G02590	AT5G08350	AT5G08350	830733	GRAM domain-containing protein / ABA-responsive protein-related
Eucgr.G02607	AT3G19990	AT3G19990	821537
Eucgr.G02613	AT5G23395	MIA40	832404	Cox19-like CHCH family protein
Eucgr.G02625	AT5G13750	ZIFL1	831220	zinc induced facilitator-like 1
Eucgr.G02645	AT5G17770	CBR	831645	NADH:cytochrome B5 reductase 1
Eucgr.G02647	AT5G17770	CBR	831645	NADH:cytochrome B5 reductase 1
Eucgr.G02648	AT5G17770	CBR	831645	NADH:cytochrome B5 reductase 1
Eucgr.H00814	AT5G48940	AT5G48940	834952	Leucine-rich repeat transmembrane protein kinase family protein
Eucgr.H00823	AT2G20190	CLASP	816539	CLIP-associated protein
Eucgr.H00833	AT5G43900	MYA2	834412	myosin 2
Eucgr.H00906	AT2G47180	GolS1	819331	galactinol synthase 1
Eucgr.H00996	AT2G47260	WRKY23	819339	WRKY DNA-binding protein 23
Eucgr.H00997	AT4G01970	STS	828186	stachyose synthase
Eucgr.H01039	AT5G27620	CYCH;1	832824	cyclin H;1
Eucgr.H01860	AT5G48370	AT5G48370	834890	Thioesterase/thiol ester dehydrase-isomerase superfamily protein
Eucgr.H01866	AT4G22720	AT4G22720	828368	Actin-like ATPase superfamily protein
Eucgr.H03249	AT1G09150	AT1G09150	837434	pseudouridine synthase and archaeosine transglycosylase (PUA) domain-containing protein
Eucgr.H03276	AT1G09160	AT1G09160	837436	Protein phosphatase 2C family protein
Eucgr.H03299	AT5G26800	AT5G26800	832738
Eucgr.H03305	AT1G09310	AT1G09310	837452	Protein of unknown function, DUF538
Eucgr.H03347	AT3G27030	AT3G27030	822321
Eucgr.H03350	AT3G01990	ACR6	821217	ACT domain repeat 6
Eucgr.H03360	AT5G41070	DRB5	834109	dsRNA-binding protein 5
Eucgr.H03362	AT5G13180	NAC083	831157	NAC domain containing protein 83
Eucgr.H03372	AT5G13210	AT5G13210	831161	Uncharacterised conserved protein UCP015417, vWA
Eucgr.H03373	AT5G13210	AT5G13210	831161	Uncharacterised conserved protein UCP015417, vWA
Eucgr.H03387	AT5G13180	NAC083	831157	NAC domain containing protein 83
Eucgr.H04067	AT3G17130	AT3G17130	820970	Plant invertase/pectin methylesterase inhibitor superfamily protein
Eucgr.H04076	AT1G09320	AT1G09320	837453	agenet domain-containing protein
Eucgr.H04342	AT3G63380	AT3G63380	825513	ATPase E1-E2 type family protein / haloacid dehalogenase-like hydrolase family protein
Eucgr.H04391	AT4G14880	OASA1	827145	O-acetylserine (thiol) lyase (OAS-TL) isoform A1
Eucgr.H04515	AT1G56210	AT1G56210	842074	Heavy metal transport/detoxification superfamily protein
Eucgr.H04532	AT4G15800	RALFL33	827260	ralf-like 33
Eucgr.H04534	AT3G05520	CPA	819717	Subunits of heterodimeric actin filament capping protein Capz superfamily
Eucgr.H04549	AT4G15920	SWEET17	827274	Nodulin MtN3 family protein
Eucgr.H04562	AT2G06050	OPR3	815160	12-oxophytodienoate reductase 1
Eucgr.H04601	AT3G02000	ROXY1	820200	Thioredoxin superfamily protein
Eucgr.H04604
Eucgr.H04608	AT1G69040	ACR4	843236	ACT domain repeat 4
Eucgr.H04609	AT5G13110	G6PD2	831150	glucose-6-phosphate dehydrogenase 2
Eucgr.H04615	AT5G14090	AT5G14090	831258
Eucgr.H04654	AT1G67510	AT1G67510	843072	Leucine-rich repeat protein kinase family protein
Eucgr.H04675	AT3G13080	ABCC3	820496	multidrug resistance-associated protein 3
Eucgr.H04693	AT1G67710	ARR11	843096	response regulator 11
Eucgr.H04694	AT1G67710	ARR11	843096	response regulator 11
Eucgr.H04733	AT4G40080	AT4G40080	830171	ENTH/ANTH/VHS superfamily protein
Eucgr.H04742	AT2G22430	HB6	816775	homeobox protein 6
Eucgr.H04748	AT4G39980	DHS1	830159	3-deoxy-D-arabino-heptulosonate 7-phosphate synthase 1
Eucgr.H04787	AT5G65020	ANNAT2	836626	annexin 2
Eucgr.H04816	AT5G10180	SULTR2;1	830882	slufate transporter 2;1
Eucgr.H04823	AT4G05430	AT4G05430	825891	Carbohydrate-binding X8 domain superfamily protein
Eucgr.H04824	AT5G10030	TGA4	830866	bZIP transcription factor family protein
Eucgr.H04867	AT2G38570	AT2G38570	818439
Eucgr.H04982	AT2G34930	AT2G34930	818058	disease resistance family protein / LRR family protein
Eucgr.H04990	AT2G17270	PHT3;3	816233	phosphate transporter 3;3
Eucgr.H05003	AT4G38210	EXPA20	829977	expansin A20
Eucgr.H05004	AT5G09315	AT5G09315	28721089	Vacuolar sorting protein 9 (VPS9) domain
Eucgr.H05015	AT1G12930	AT1G12930	837851	ARM repeat superfamily protein
Eucgr.H05035	AT1G60690	AT1G60690	842363	NAD(P)-linked oxidoreductase superfamily protein
Eucgr.I01089
Eucgr.I01093	AT4G34260	FUC95A	829575	1,2-alpha-L-fucosidases
Eucgr.I01099	AT2G15220	AT2G15220	816011	Plant basic secretory protein (BSP) family protein
Eucgr.I01100	AT1G49820	MTK	841405	S-methyl-5-thioribose kinase
Eucgr.I01115	AT4G34131	UGT73B3	829559	UDP-glucosyl transferase 73B3
Eucgr.I01117	AT2G15490	UGT73B4	816041	UDP-glucosyl transferase 73B3
Eucgr.I01120	AT2G15490	UGT73B4	816041	UDP-glycosyltransferase 73B4
Eucgr.I01127	AT2G15490	UGT73B4	816041	UDP-glycosyltransferase 73B4
Eucgr.I01128	AT4G34120	LEJ1	829558	Cystathionine beta-synthase (CBS) family protein
Eucgr.I01150	AT3G19260	LOH2	821460	LAG1 homologue 2
Eucgr.I01153	AT4G34410	RRTF1	829591	redox responsive transcription factor 1
Eucgr.I01157	AT1G14870	PCR2	838052	PLANT CADMIUM RESISTANCE 2
Eucgr.I01167	AT2G15730	AT2G15730	816067	P-loop containing nucleoside triphosphate hydrolases superfamily protein
Eucgr.I01178	AT4G37180	AT4G37180	829872	Homeodomain-like superfamily protein
Eucgr.I01183	AT3G19050	POK2	821439	phragmoplast orienting kinesin 2
Eucgr.I01187	AT3G19000	AT3G19000	821433	2-oxoglutarate (2OG) and Fe(II)-dependent oxygenase superfamily protein
Eucgr.I01189	AT3G19000	AT3G19000	821433	2-oxoglutarate (2OG) and Fe(II)-dependent oxygenase superfamily protein
Eucgr.I01206	AT3G19000	AT3G19000	821433	2-oxoglutarate (2OG) and Fe(II)-dependent oxygenase superfamily protein
Eucgr.I01215	AT4G31940	CYP82C4	829324	cytochrome P450, family 82, subfamily C, polypeptide 4
Eucgr.I01217	AT4G31940	CYP82C4	829324	cytochrome P450, family 82, subfamily C, polypeptide 2
Eucgr.I01231	AT2G15970	COR413-PM1	816092	cold regulated 413 plasma membrane 1
Eucgr.I01233	AT2G15980	AT2G15980	816093	Tetratricopeptide repeat (TPR)-like superfamily protein
Eucgr.I01234	AT2G16050	AT2G16050	816102	Cysteine/Histidine-rich C1 domain family protein
Eucgr.I01235	AT2G23690	AT2G23690	816900
Eucgr.I01245
Eucgr.I01248	AT4G36750	AT4G36750	829828	Quinone reductase family protein
Eucgr.I01255	AT3G18830	PMT5	821416	polyol/monosaccharide transporter 5
Eucgr.I01259	AT1G49310	AT1G49310	841354
Eucgr.I01260	AT1G49320	USPL1	841355	unknown seed protein like 1
Eucgr.I01262	AT1G49270	PERK7	841351	Protein kinase superfamily protein
Eucgr.I01265	AT4G34490	CAP1	829600	cyclase associated protein 1
Eucgr.I01266	AT4G34500	AT4G34500	829601	Protein kinase superfamily protein
Eucgr.I01272	AT2G16250	AT2G16250	816121	Leucine-rich repeat protein kinase family protein
Eucgr.I01277	AT1G19440	KCS4	838528	3-ketoacyl-CoA synthase 16
Eucgr.I01280	AT4G25730	AT4G25730	828678	FtsJ-like methyltransferase family protein
Eucgr.I01283	AT5G66440	AT5G66440	836776
Eucgr.I01285	AT4G34580	COW1	829610	Sec14p-like phosphatidylinositol transfer family protein
Eucgr.I01291	AT2G16385	AT2G16385	2745542
Eucgr.I01294	AT3G51000	AT3G51000	824264	alpha/beta-Hydrolases superfamily protein
Eucgr.I01295	AT2G21440	AT2G21440	816683	RNA-binding (RRM/RBD/RNP motifs) family protein
Eucgr.I01297	AT2G16430	PAP10	816141	purple acid phosphatase 10
Eucgr.I01298	AT2G16430	PAP10	816141	purple acid phosphatase 10
Eucgr.I01304	AT2G16430	PAP10	816141	purple acid phosphatase 10
Eucgr.I01318	AT4G10550	AT4G10550	826647	Subtilase family protein
Eucgr.I01325	AT4G39010	GH9B18	830056	glycosyl hydrolase 9B18
Eucgr.I01348	AT4G34770	AT4G34770	829629	SAUR-like auxin-responsive protein family
Eucgr.I01349	AT4G34770	AT4G34770	829629	SAUR-like auxin-responsive protein family
Eucgr.I01351	AT4G34770	AT4G34770	829629	SAUR-like auxin-responsive protein family
Eucgr.I01352	AT4G34770	AT4G34770	829629	SAUR-like auxin-responsive protein family
Eucgr.I01368	AT4G38810	AT4G38810	830036	Calcium-binding EF-hand family protein
Eucgr.I01383	AT4G34880	AT4G34880	829640	Amidase family protein
Eucgr.I01386	AT4G34880	AT4G34880	829640	Amidase family protein
Eucgr.I01388	AT4G34880	AT4G34880	829640	Amidase family protein
Eucgr.I01394	AT4G34940	ARO1	829646	armadillo repeat only 1
Eucgr.I01395	AT2G17870	CSP3	816297	cold shock domain protein 3
Eucgr.I01400	AT4G38640	AT4G38640	830020	Plasma-membrane choline transporter family protein
Eucgr.I01402	AT4G34980	SLP2	829650	subtilisin-like serine protease 2
Eucgr.I01404	AT2G17840	ERD7	816293	Senescence/dehydration-associated protein-related
Eucgr.I01519	AT4G35270	AT4G35270	829680	Plant regulator RWP-RK family protein
Eucgr.I01526	AT4G38260	AT4G38260	829983	Protein of unknown function (DUF833)
Eucgr.I01541	AT4G38220	AQI	829978	Peptidase M20/M25/M40 family protein
Eucgr.I01607	AT5G14040	PHT3;1	831252	phosphate transporter 3;1
Eucgr.I01612	AT4G25040	AT4G25040	828607	Uncharacterised protein family (UPF0497)
Eucgr.I01615	AT3G02030	AT3G02030	821242	Esterase/lipase/thioesterase family protein
Eucgr.I01620	AT3G02040	SRG3	821175	senescence-related gene 3
Eucgr.I01709	AT3G01680	SEOR1	821097
Eucgr.I01712	AT3G01680	SEOR1	821097
Eucgr.I01713	AT3G01680	SEOR1	821097
Eucgr.I01714	AT3G01680	SEOR1	821097
Eucgr.I01715	AT3G01680	SEOR1	821097
Eucgr.I01727	AT5G14450	AT5G14450	831296	GDSL-like Lipase/Acylhydrolase superfamily protein
Eucgr.I01737	AT5G14500	AT5G14500	831301	aldose 1-epimerase family protein
Eucgr.I01743
Eucgr.I01882	AT1G70090	LGT8	843345	galacturonosyltransferase-like 10
Eucgr.I01893	AT3G28345	ABCB15	822463	ABC transporter family protein
Eucgr.I01907	AT5G40010	AATP1	833998	AAA-ATPase 1
Eucgr.I01911	AT5G62670	HA11	836388	H(+)-ATPase 11
Eucgr.I01912	AT5G39950	TRX2	833992	thioredoxin 2
Eucgr.I01914
Eucgr.I01919	AT5G15100	PIN8	831362	Auxin efflux carrier family protein
Eucgr.I01961	AT5G15330	SPX4	831385	SPX domain gene 4
Eucgr.I01970	AT3G29060	AT3G29060	822550	EXS (ERD1/XPR1/SYG1) family protein
Eucgr.I01996	AT5G15350	ENODL17	831387	early nodulin-like protein 17
Eucgr.I02066	AT3G02260	BIG	820398	auxin transport protein (BIG)
Eucgr.I02067
Eucgr.I02090	AT3G30530	bZIP42	822767	basic leucine-zipper 42
Eucgr.I02127
Eucgr.I02134	AT3G14200	AT3G14200	820637	Chaperone DnaJ-domain superfamily protein
Eucgr.I02378	AT3G51070	AT3G51070	824271	S-adenosyl-L-methionine-dependent methyltransferases superfamily protein
Eucgr.I02395	AT5G66400	RAB18	836772	Dehydrin family protein
Eucgr.I02443	AT3G50860	AT3G50860	824250	Clathrin adaptor complex small chain family protein
Eucgr.I02456	AT5G07610	AT5G07610	830654	F-box family protein
Eucgr.I02463	AT5G66730	IDD1	836806	C2H2-like zinc finger protein
Eucgr.I02468	AT4G36760	APP1	829829	aminopeptidase P1
Eucgr.I02494	AT3G49780	PSK4	824140	phytosulfokine 4 precursor
Eucgr.I02496	AT4G27190	AT4G27190	828827	NB-ARC domain-containing disease resistance protein
Eucgr.I02498	AT1G23780	AT1G23780	838989	F-box family protein
Eucgr.I02500	AT1G50020	AT1G50020	841426
Eucgr.I02502	AT4G08170	AT4G08170	826367	Inositol 1,3,4-trisphosphate 5/6-kinase family protein
Eucgr.I02512	AT4G33690	AT4G33690	829511
Eucgr.I02515	AT2G14260	PIP	815913	proline iminopeptidase
Eucgr.I02524	AT3G16460	JAL34	820894	Mannose-binding lectin superfamily protein
Eucgr.I02541
Eucgr.I02568	AT5G64440	FAAH	836565	fatty acid amide hydrolase
Eucgr.I02571	AT5G13180	NAC083	831157	NAC transcription factor-like 9
Eucgr.I02572
Eucgr.I02584	AT2G04305	AT2G04305	814969	Magnesium transporter CorA-like family protein
Eucgr.I02585	AT5G64410	OPT4	836562	oligopeptide transporter 4
Eucgr.I02596	AT3G57230	AGL16	824890	AGAMOUS-like 16
Eucgr.I02609	AT2G23970	AT2G23970	816930	Class I glutamine amidotransferase-like superfamily protein
Eucgr.I02615	AT4G33640	AT4G33640	829505
Eucgr.I02618	AT2G22570	NIC1	816789	nicotinamidase 1
Eucgr.I02621	AT5G23300	PYRD	832394	pyrimidine d
Eucgr.I02628	AT1G58120	AT1G58120	842179
Eucgr.I02631	AT2G14095	AT2G14095	815895
Eucgr.I02637	AT5G64270	AT5G64270	836548	splicing factor, putative
Eucgr.I02656	AT1G22380	UGT85A3	838845	UDP-glucosyl transferase 85A3
Eucgr.I02658	AT1G02170	MC1	839561	metacaspase 1
Eucgr.I02659	AT1G02170	MC1	839561	metacaspase 1
Eucgr.I02682	AT1G22150	SULTR1;3	838820	sulfate transporter 1;3
Eucgr.J00195	AT2G40170	GEA6	818608	Stress induced protein
Eucgr.J00224	AT5G05690	CPD	830453	Cytochrome P450 superfamily protein
Eucgr.J00265
Eucgr.J00279	AT5G04830	AT5G04830	830362	Nuclear transport factor 2 (NTF2) family protein
Eucgr.J00308	AT5G04890	RTM2	830370	HSP20-like chaperones superfamily protein
Eucgr.J00317	AT5G04980	AT5G04980	830380	DNAse I-like superfamily protein
Eucgr.J00393	AT5G22870	AT5G22870	832350	Late embryogenesis abundant (LEA) hydroxyproline-rich glycoprotein family
Eucgr.J00434	AT5G22580	AT5G22580	832321	Stress responsive A/B Barrel Domain
Eucgr.J00447	AT4G36770	AT4G36770	829830	UDP-glucosyl transferase 72B3
Eucgr.J00574	AT2G35940	BLH1	818167	BEL1-like homeodomain 1
Eucgr.J00576	AT5G22090	AT5G22090	832270	Protein of unknown function (DUF3049)
Eucgr.J00585	AT5G22040	AT5G22040	832265
Eucgr.J00611	AT2G27140	AT2G27140	817256	HSP20-like chaperones superfamily protein
Eucgr.J00629	AT2G27060	AT2G27060	817248	Leucine-rich repeat protein kinase family protein
Eucgr.J00745	AT3G21090	ABCG15	821661	ABC-2 type transporter family protein
Eucgr.J00786	AT1G63440	HMA5	842650	heavy metal atpase 5
Eucgr.J00788	AT3G57670	NTT	824936	C2H2-type zinc finger family protein
Eucgr.J00843	AT3G18630	UNG	821394	uracil dna glycosylase
Eucgr.J00871	AT3G51550	FER	824318	Malectin/receptor-like protein kinase family protein
Eucgr.J00882	AT5G08320	AT5G08320	830728
Eucgr.J00890	AT1G05460	SDE3	837047	P-loop containing nucleoside triphosphate hydrolases superfamily protein
Eucgr.J00894	AT5G60800	AT5G60800	836201	Heavy metal transport/detoxification superfamily protein
Eucgr.J00901
Eucgr.J00906
Eucgr.J00909	AT2G28260	CNGC15	817372	cyclic nucleotide-gated channel 15
Eucgr.J00911	AT2G28260	CNGC15	817372	cyclic nucleotide-gated channel 15
Eucgr.J00912	AT2G28260	CNGC15	817372	cyclic nucleotide-gated channel 15
Eucgr.J00919	AT2G28260	CNGC15	817372	cyclic nucleotide-gated channel 15
Eucgr.J00920	AT2G28305	LOG1	817376	Putative lysine decarboxylase family protein
Eucgr.J00935	AT3G09770	LOG2	820135	RING/U-box superfamily protein
Eucgr.J00948	AT2G28490	AT2G28490	817397	RmlC-like cupins superfamily protein
Eucgr.J00952	AT5G60340	AAK6	836156	P-loop containing nucleoside triphosphate hydrolases superfamily protein
Eucgr.J00957	AT2G28510	AT2G28510	817399	Dof-type zinc finger DNA-binding family protein
Eucgr.J00961	AT3G45650	NAXT1	823707	nitrate excretion transporter1
Eucgr.J00976	AT1G22360	UGT85A2	838843	UDP-glucosyl transferase 85A2
Eucgr.J00985	AT3G54260	TBL36	824593	TRICHOME BIREFRINGENCE-LIKE 36
Eucgr.J00988	AT4G27190	AT4G27190	828827	NB-ARC domain-containing disease resistance protein
Eucgr.J01004	AT5G23710	AT5G23710	832436	DNA binding;DNA-directed RNA polymerases
Eucgr.J01011	AT5G04660	CYP77A4	830343	cytochrome P450, family 77, subfamily A, polypeptide 4
Eucgr.J01013	AT5G49690	AT5G49690	835032	UDP-Glycosyltransferase superfamily protein
Eucgr.J01014
Eucgr.J01018	AT3G57810	AT3G57810	824950	Cysteine proteinases superfamily protein
Eucgr.J01025	AT5G04550	AT5G04550	830334	Protein of unknown function (DUF668)
Eucgr.J01036	AT2G36690	AT2G36690	818241	2-oxoglutarate (2OG) and Fe(II)-dependent oxygenase superfamily protein
Eucgr.J01045	AT3G10420	SPD1	820206	P-loop containing nucleoside triphosphate hydrolases superfamily protein
Eucgr.J01046	AT1G80930	AT1G80930	844433	MIF4G domain-containing protein / MA3 domain-containing protein
Eucgr.J01061	AT3G07510	AT3G07510	819939
Eucgr.J01066	AT2G39130	AT2G39130	818499	Transmembrane amino acid transporter family protein
Eucgr.J01219	AT3G47800	AT3G47800	823934	Galactose mutarotase-like superfamily protein
Eucgr.J01377	AT2G41460	ARP	818744	apurinic endonuclease-redox protein
Eucgr.J01390	AT3G51550	FER	824318	Malectin/receptor-like protein kinase family protein
Eucgr.J01429	AT5G11390	WIT1	831010	WPP domain-interacting protein 1
Eucgr.J01446	AT5G38760	AT5G38760	833867	Late embryogenesis abundant protein (LEA) family protein
Eucgr.J01523	AT3G02600	LPP3	821299	lipid phosphate phosphatase 3
Eucgr.J01539	AT2G01275	AT2G01275	814655	RING/FYVE/PHD zinc finger superfamily protein
Eucgr.J01605	AT5G37660	PDLP7	833744	plasmodesmata-located protein 7
Eucgr.J01640	AT5G37180	SUS5	833692	sucrose synthase 5
Eucgr.J01648	AT1G65840	PAO4	842894	polyamine oxidase 4
Eucgr.J01662	AT5G47910	RBOHD	834842	respiratory burst oxidase homologue D
Eucgr.J01663	AT5G13870	XTH5	831233	xyloglucan endotransglucosylase/hydrolase 5
Eucgr.J01665	AT3G50120	AT3G50120	824174	Plant protein of unknown function (DUF247)
Eucgr.J01672	AT3G50120	AT3G50120	824174	Plant protein of unknown function (DUF247)
Eucgr.J01674	AT3G50160	AT3G50160	824178	Plant protein of unknown function (DUF247)
Eucgr.J01676	AT5G47900	AT5G47900	834841	Protein of unknown function (DUF1624)
Eucgr.J01701	AT4G08850	AT4G08850	826456	Leucine-rich repeat receptor-like protein kinase family protein
Eucgr.J01710	AT2G38660	AT2G38660	818448	Amino acid dehydrogenase family protein
Eucgr.J01724	AT3G13410	AT3G13410	820541
Eucgr.J01742	AT1G55540	LNO1	842002	Nuclear pore complex protein
Eucgr.J01751	AT5G56360	PSL4	835736	calmodulin-binding protein
Eucgr.J01763	AT3G13480	AT3G13480	820550
Eucgr.J01804	AT3G13620	PUT4	820565	Amino acid permease family protein
Eucgr.J01810	AT1G55320	AAE18	841977	acyl-activating enzyme 18
Eucgr.J01811	AT1G55320	AAE18	841977	acyl-activating enzyme 18
Eucgr.J01820	AT4G25650	ACD1-LIKE	828670	ACD1-like
Eucgr.J01833	AT3G11920	AT3G11920	820365	glutaredoxin-related
Eucgr.J01839	AT2G30300	AT2G30300	817580	Major facilitator superfamily protein
Eucgr.J01842	AT2G30395	OFP17	817590	ovate family protein 17
Eucgr.J01843	AT5G58350	WNK4	835947	with no lysine (K) kinase 4
Eucgr.J01875	AT2G30140	UGT87A2	817566	UDP-Glycosyltransferase superfamily protein
Eucgr.J01884	AT2G40116	AT2G40116	818602	Phosphoinositide-specific phospholipase C family protein
Eucgr.J01887	AT3G08510	PLC2	819999	phospholipase C 2
Eucgr.J01896	AT4G33070	AT4G33070	829444	Thiamine pyrophosphate dependent pyruvate decarboxylase family protein
Eucgr.J01912	AT5G58720	AT5G58720	835986	smr (Small MutS Related) domain-containing protein
Eucgr.J01922	AT2G29710	AT2G29710	817521	UDP-Glycosyltransferase superfamily protein
Eucgr.J01924	AT2G29670	AT2G29670	817517	Tetratricopeptide repeat (TPR)-like superfamily protein
Eucgr.J01932	AT3G54140	PTR1	824581	peptide transporter 1
Eucgr.J01942	AT3G54140	PTR1	824581	peptide transporter 1
Eucgr.J02363	AT3G50930	BCS1	824257	cytochrome BC1 synthesis
Eucgr.J02373	AT3G50930	BCS1	824257	cytochrome BC1 synthesis
Eucgr.J02384	AT4G36380	ROT3	829790	Cytochrome P450 superfamily protein
Eucgr.J02426	AT2G17990	AT2G17990	816311
Eucgr.J02439	AT4G36010	AT4G36010	829757	Pathogenesis-related thaumatin superfamily protein
Eucgr.J02440	AT4G36010	AT4G36010	829757	Pathogenesis-related thaumatin superfamily protein
Eucgr.J02452	AT1G11000	MLO4	837643	Seven transmembrane MLO family protein
Eucgr.J02456	AT5G66150	AT5G66150	836747	Glycosyl hydrolase family 38 protein
Eucgr.J02459	AT5G66150	AT5G66150	836747	Glycosyl hydrolase family 38 protein
Eucgr.J02461	AT4G35980	AT4G35980	829752
Eucgr.J02462	AT3G51280	AT3G51280	824291	Tetratricopeptide repeat (TPR)-like superfamily protein
Eucgr.J02463	AT4G35000	APX3	829652	ascorbate peroxidase 3
Eucgr.J02473	AT4G35930	FBS4	829748	F-box family protein
Eucgr.J02474	AT4G35920	MCA1	829747	PLAC8 family protein
Eucgr.J02482	AT4G35900	FD	829744	Basic-leucine zipper (bZIP) transcription factor family protein
Eucgr.J02492	AT1G76070	AT1G76070	843939
Eucgr.J02496	AT4G35760	LTO1	829729	NAD(P)H dehydrogenase (quinone)s
Eucgr.J02508	AT5G60060	AT5G60060	836128	Protein of unknown function (DUF295)
Eucgr.J02517	AT3G51390	AT3G51390	824302	DHHC-type zinc finger family protein
Eucgr.J02520	AT4G38380	AT4G38380	829995	MATE efflux family protein
Eucgr.J02521	AT3G51430	YLS2	824306	Calcium-dependent phosphotriesterase superfamily protein
Eucgr.J02534	AT5G66010	AT5G66010	836731	RNA-binding (RRM/RBD/RNP motifs) family protein
Eucgr.J02535	AT1G20696	HMGB3	838659	high mobility group B3
Eucgr.J02543	AT2G17520	IRE1A	816258	Endoribonuclease/protein kinase IRE1-like
Eucgr.J02544	AT2G17520	IRE1A	816258	Endoribonuclease/protein kinase IRE1-like
Eucgr.J02551	AT2G17480	MLO8	816254	Seven transmembrane MLO family protein
Eucgr.J02559
Eucgr.J02568	AT1G20925	AT1G20925	838686	Auxin efflux carrier family protein
Eucgr.J02579	AT1G14130	AT1G14130	837972	2-oxoglutarate (2OG) and Fe(II)-dependent oxygenase superfamily protein
Eucgr.J02591	AT1G72310	ATL3	843563	RING/U-box superfamily protein
Eucgr.J02592
Eucgr.J02607	AT1G56150	AT1G56150	842068	SAUR-like auxin-responsive protein family
Eucgr.J02618	AT5G45470	AT5G45470	834583	Protein of unknown function (DUF594)
Eucgr.J02626	AT5G25170	AT5G25170	832588	PPPDE putative thiol peptidase family protein
Eucgr.J02719	AT4G19840	PP2-A1	827728	phloem protein 2-A1
Eucgr.J02805	AT3G14067	AT3G14067	820621	Subtilase family protein
Eucgr.J02919	AT4G29990	AT4G29990	829122	Leucine-rich repeat transmembrane protein kinase protein
Eucgr.J02930	AT4G29340	PRF4	829055	profilin 5
Eucgr.J02934	AT3G16500	PAP1	820898	phytochrome-associated protein 1
Eucgr.J02939	AT3G16350	AT3G16350	820882	Homeodomain-like superfamily protein
Eucgr.J02951	AT3G50390	AT3G50390	824203	Transducin/WD40 repeat-like superfamily protein
Eucgr.J02958	AT1G52230	PSAH2	841653	photosystem I subunit H2
Eucgr.J02988	AT1G52320	AT1G52320	841662
Eucgr.J02996	AT3G15990	SULTR3;4	820844	sulfate transporter 3;4
Eucgr.J03014	AT1G80440	AT1G80440	844383	Galactose oxidase/kelch repeat superfamily protein
Eucgr.K00167	AT5G61480	PXY	836269	Leucine-rich repeat protein kinase family protein
Eucgr.K00180	AT4G25390	AT4G25390	828642	Protein kinase superfamily protein
Eucgr.K00184	AT5G51810	GA20OX2	835256	gibberellin 20 oxidase 2
Eucgr.K00188	AT5G51840	AT5G51840	835259
Eucgr.K00211	AT4G25433	AT4G25433	828647	peptidoglycan-binding LysM domain-containing protein
Eucgr.K00213	AT5G51970	AT5G51970	835272	GroES-like zinc-binding alcohol dehydrogenase family protein
Eucgr.K00237	AT5G62040	BFT	836324	PEBP (phosphatidylethanolamine-binding protein) family protein
Eucgr.K00238	AT5G62020	HSFB2A	836322	heat shock transcription factor B2A
Eucgr.K00263	AT5G52380	AT5G52380	835314	VASCULAR-RELATED NAC-DOMAIN 6
Eucgr.K00277	AT5G23910	AT5G23910	832456	ATP binding microtubule motor family protein
Eucgr.K00289
Eucgr.K00294	AT4G25700	BETA-OHASE 1	828675	beta-hydroxylase 1
Eucgr.K00308	AT5G24090	CHIA	832474	chitinase A
Eucgr.K00311	AT5G24090	CHIA	832474	chitinase A
Eucgr.K00318	AT4G23740	AT4G23740	828474	Leucine-rich repeat protein kinase family protein
Eucgr.K00328	AT5G53220	AT5G53220	835403
Eucgr.K00370	AT5G53420	AT5G53420	835423	CCT motif family protein
Eucgr.K00373	AT5G24240	AT5G24240	832491	Phosphatidylinositol 3- and 4-kinase ;Ubiquitin family protein
Eucgr.K00375	AT5G24270	SOS3	832494	Calcium-binding EF-hand family protein
Eucgr.K00387	AT5G24300	SS1	832497	Glycogen/starch synthases, ADP-glucose type
Eucgr.K00391	AT3G49290	ABIL2	824090	ABL interactor-like protein 3
Eucgr.K00392
Eucgr.K00393	AT5G53045	AT5G53045	835384
Eucgr.K00401
Eucgr.K00405	AT3G61850	DAG1	825358	Dof-type zinc finger DNA-binding family protein
Eucgr.K00413	AT5G53550	YSL3	835437	YELLOW STRIPE like 3
Eucgr.K00414	AT5G24400	EMB2024	832511	NagB/RpiA/CoA transferase-like superfamily protein
Eucgr.K00423	AT4G27670	HSP21	828881	heat shock protein 21
Eucgr.K01519	AT3G03773	AT3G03773	821159	HSP20-like chaperones superfamily protein
Eucgr.K01538
Eucgr.K01552	AT1G22180	AT1G22180	838823	Sec14p-like phosphatidylinositol transfer family protein
Eucgr.K01571	AT4G20990	ACA4	827846	alpha carbonic anhydrase 4
Eucgr.K01603	AT2G36430	AT2G36430	818217	Plant protein of unknown function (DUF247)
Eucgr.K01604	AT2G36430	AT2G36430	818217	Plant protein of unknown function (DUF247)
Eucgr.K01605	AT4G33430	BAK1	829480	proline-rich extensin-like receptor kinase 10
Eucgr.K01615	AT5G04080	AT5G04080	830287
Eucgr.K01617
Eucgr.K01620	ATCG01110			NAD(P)H dehydrogenase subunit H
Eucgr.K01643	AT3G12250	TGA6	820405	TGACG motif-binding factor 6
Eucgr.K01644	AT1G80270	PPR596	844367	PENTATRICOPEPTIDE REPEAT 596
Eucgr.K01646	AT2G41150	AT2G41150	818714
Eucgr.K01657	AT3G09270	GSTU8	820083	glutathione S-transferase TAU 8
Eucgr.K01658	AT3G09270	GSTU8	820083	glutathione S-transferase TAU 8
Eucgr.K01661	AT3G09270	GSTU8	820083	glutathione S-transferase TAU 8
Eucgr.K01667	AT3G56480	AT3G56480	824815	myosin heavy chain-related
Eucgr.K01692	AT5G05070	AT5G05070	830389	DHHC-type zinc finger family protein
Eucgr.K01715	AT3G14470	AT3G14470	820670	NB-ARC domain-containing disease resistance protein
Eucgr.K01750	AT2G41820	AT2G41820	818781	Leucine-rich repeat protein kinase family protein
Eucgr.K01802	AT2G41740	VLN2	818773	villin 2
Eucgr.K01803	AT2G41740	VLN2	818773	villin 2
Eucgr.K01812
Eucgr.K01821	AT3G12150	AT3G12150	820392
Eucgr.K01832	AT5G06790	AT5G06790	830569
Eucgr.K01838	AT2G42120	POLD2	818812	DNA polymerase delta small subunit
Eucgr.K01841	AT3G53750	ACT3	824542	actin 1
Eucgr.K01847	AT5G06710	HAT14	830560	homeobox from Arabidopsis thaliana
Eucgr.K01849	AT5G06680	SPC98	830557	spindle pole body component 98
Eucgr.K01875	AT3G14470	AT3G14470	820670	NB-ARC domain-containing disease resistance protein
Eucgr.K01881	AT3G14900	EMB3120	820719
Eucgr.K01894	AT1G69730	AT1G69730	843309	Wall-associated kinase family protein
Eucgr.K01899
Eucgr.K01900	AT5G06600	UBP12	830548	ubiquitin-specific protease 12
Eucgr.K01902	AT5G06600	UBP12	830548	ubiquitin-specific protease 12
Eucgr.K01913	AT5G22000	RHF2A	832260	RING-H2 group F2A
Eucgr.K01921	AT5G06510	NF-YA10	830539	nuclear factor Y, subunit A10
Eucgr.K02016	AT3G14470	AT3G14470	820670	NB-ARC domain-containing disease resistance protein
Eucgr.K02018	AT3G57320	AT3G57320	824899
Eucgr.K02020	AT3G10300	AT3G10300	820192	Calcium-binding EF-hand family protein
Eucgr.K02021	AT4G20990	ACA4	827846	alpha carbonic anhydrase 4
Eucgr.K02245	AT3G18170	AT3G18170	821344	Glycosyltransferase family 61 protein
Eucgr.K02248	AT3G09270	GSTU8	820083	glutathione S-transferase TAU 8
Eucgr.K02264	AT3G18040	MPK9	821329	MAP kinase 9
Eucgr.K02276	AT3G17930	DAC	819775
Eucgr.K02279	AT3G17860	JAZ3	821055	jasmonate-zim-domain protein 3
Eucgr.K02288	AT1G73480	AT1G73480	843683	alpha/beta-Hydrolases superfamily protein
Eucgr.K02292	AT2G01940	SGR5	814725	C2H2-like zinc finger protein
Eucgr.K02295	AT1G69550	AT1G69550	843291	disease resistance protein (TIR-NBS-LRR class)
Eucgr.K02300	AT3G48750	CDC2	824036	cell division control 2
Eucgr.K02303	AT3G17730	NAC057	821041	NAC domain containing protein 57
Eucgr.K02305	AT1G73370	SUS6	843672	sucrose synthase 6
Eucgr.K02309	AT1G48405	AT1G48405	841261	Kinase interacting (KIP1-like) family protein
Eucgr.K02322	AT5G08350	AT5G08350	830733	GRAM domain-containing protein / ABA-responsive protein-related
Eucgr.K02341	AT1G73210	AT1G73210	843655	Protein of unknown function (DUF789)
Eucgr.K02343	AT1G17840	ABCG11	838363	white-brown complex homolog protein 11
Eucgr.K02355	AT2G43840	UGT74F1	818988	UDP-glycosyltransferase 74 F1
Eucgr.K02356	AT2G43820	UGT74F2	818986	UDP-glucosyltransferase 74F2
Eucgr.K02359	AT3G25480	AT3G25480	822132	Rhodanese/Cell cycle control phosphatase superfamily protein
Eucgr.K02360	AT3G07525	ATG10	819941	autophagocytosis-associated family protein
Eucgr.K02378	AT5G48380	BIR1	834892	BAK1-interacting receptor-like kinase 1
Eucgr.K02384	AT3G10020	AT3G10020	820163
Eucgr.K02410	AT3G10020	AT3G10020	820163
Eucgr.K02413	AT2G36650	AT2G36650	818237
Eucgr.K02422	AT5G03560	AT5G03560	831789	Tetratricopeptide repeat (TPR)-like superfamily protein
Eucgr.K02428	AT5G06600	UBP12	830548	ubiquitin-specific protease 12
Eucgr.K02437	AT5G03530	RABC2A	831810	RAB GTPase homolog C2A
Eucgr.K02444	AT2G47140	SDR5	819327	NAD(P)-binding Rossmann-fold superfamily protein
Eucgr.K02446	AT2G47120	AT2G47120	819325	NAD(P)-binding Rossmann-fold superfamily protein
Eucgr.K02451	AT1G07400	AT1G07400	837252	HSP20-like chaperones superfamily protein
Eucgr.K02472	AT1G74670	GASA6	843806	Gibberellin-regulated family protein
Eucgr.K02478	AT3G47510	AT3G47510	823905
Eucgr.K02488	AT1G18720	AT1G18720	838454	Protein of unknown function (DUF962)
Eucgr.K02506	AT5G15490	UGD3	831402	UDP-glucose 6-dehydrogenase family protein
Eucgr.K02605	AT5G42560	AT5G42560	834262	Abscisic acid-responsive (TB2/DP1, HVA22) family protein
Eucgr.K02614	AT3G11650	NHL2	820337	NDR1/HIN1-like 2
Eucgr.K02615	AT3G52470	AT3G52470	824412	Late embryogenesis abundant (LEA) hydroxyproline-rich glycoprotein family
Eucgr.K03459	AT1G23000	AT1G23000	838908	Heavy metal transport/detoxification superfamily protein
Eucgr.K03470	AT2G47800	ABCC4	819392	multidrug resistance-associated protein 4
Eucgr.K03471	AT2G47710	AT2G47710	819384	Adenine nucleotide alpha hydrolases-like superfamily protein
Eucgr.K03481	AT2G47680	AT2G47680	819381	zinc finger (CCCH type) helicase family protein
Eucgr.K03483	AT2G47680	AT2G47680	819381	zinc finger (CCCH type) helicase family protein
Eucgr.K03488	AT2G47600	MHX	819373	magnesium/proton exchanger
Eucgr.K03506	AT5G61760	IPK2BETA	836298	inositol polyphosphate kinase 2 beta
Eucgr.K03510	AT5G61760	IPK2BETA	836298	inositol polyphosphate kinase 2 beta
Eucgr.K03516
Eucgr.K03526	AT4G02120	AT4G02120	828137	CTP synthase family protein
Eucgr.K03534	AT3G62580	AT3G62580	825432	Late embryogenesis abundant protein (LEA) family protein
Eucgr.K03536	AT3G62580	AT3G62580	825432	Late embryogenesis abundant protein (LEA) family protein
Eucgr.K03539	AT4G02100	AT4G02100	828142	Heat shock protein DnaJ with tetratricopeptide repeat
Eucgr.K03543	AT3G62470	AT3G62470	825421	Pentatricopeptide repeat (PPR) superfamily protein
Eucgr.K03545	AT2G47400	CP12-1	819353	CP12 domain-containing protein 1
Eucgr.K03550	AT4G02010	AT4G02010	827234	Protein kinase superfamily protein
Eucgr.K03551	AT3G62370	AT3G62370	825410	heme binding
Eucgr.K03553	AT4G01970	STS	828186	stachyose synthase
Eucgr.K03562	AT2G47190	MYB2	819332	myb domain protein 2
Eucgr.K03563	AT2G47180	GolS1	819331	galactinol synthase 1
Eucgr.K03568	AT5G26751	SK 11	832733	shaggy-related kinase 11
Eucgr.K03577	AT3G04300	AT3G04300	819585	RmlC-like cupins superfamily protein
Eucgr.K03579	AT4G28706	AT4G28706	828990	pfkB-like carbohydrate kinase family protein
Eucgr.K03580	AT1G04150	AT1G04150	839249	C2 calcium/lipid-binding plant phosphoribosyltransferase family protein
Eucgr.K03589	AT4G28780	AT4G28780	828999	GDSL-like Lipase/Acylhydrolase superfamily protein
Eucgr.K03592	AT2G20180	PIL5	816538	phytochrome interacting factor 3-like 5
Eucgr.K03599	AT1G77120	ADH1	844047	alcohol dehydrogenase 1
Eucgr.L00001	AT5G62460	AT5G62460	836366	RING/FYVE/PHD zinc finger superfamily protein
Eucgr.L00004	AT3G59670	AT3G59670	825136
Eucgr.L00344	AT3G30340	UMAMIT32	822735	nodulin MtN21 /EamA-like transporter family protein

## Sheet: Gene in stable QTLs
No.	QTL	Trait	Chr.	Start (bp)	End (bp)	QTL gene	Candidate gene	Annotation
1	qBD2Stable	BD	Chr02	6224682	6232718	Eucgr.B00614		histone-lysine N-methyltransferases
2	qD2Stable	D	Chr02	6423907	6426889	Eucgr.B00621		Galactose oxidase/kelch repeat superfamily protein
3	qD2Stable	D	Chr02	6511465	6516514	Eucgr.B00624		RHOMBOID-like protein 12
4	qD2Stable	D	Chr02	6541908	6544117	Eucgr.B00627	Eucgr.B00627	cytochrome P450, family 78, subfamily A, polypeptide 10
5	qD2Stable	D	Chr02	6559855	6562698	Eucgr.B00628	Eucgr.B00628	COBRA-like protein 1 precursor
6	qD2Stable	D	Chr02	6563246	6565170	Eucgr.B00629		COBRA-like extracellular glycosyl-phosphatidyl inositol-anchored protein family
7	qD2Stable	D	Chr02	6573009	6576407	Eucgr.B00631		Squamosa promoter-binding protein-like (SBP domain) transcription factor family protein
8	qD2Stable	D	Chr02	6518113	6520845	Eucgr.B00625
9	qD2Stable	D	Chr02	6569350	6571372	Eucgr.B00630		reversibly glycosylated polypeptide 3
10	qSG3_1Stable	SG	Chr03	82134365	82138048	Eucgr.C04395		glucuronidase 3
11	qSG3_1Stable	SG	Chr03	82145529	82145924	Eucgr.C04396
12	qSG3_1Stable	SG	Chr03	82150464	82152363	Eucgr.C04397		ECA1 gametogenesis related family protein
13	qSG3_1Stable	SG	Chr03	82168874	82170221	Eucgr.C04399		ubiquitin-associated (UBA)/TS-N domain-containing protein
14	qSG3_1Stable	SG	Chr03	82177659	82178709	Eucgr.C04400		epsin N-terminal homology (ENTH) domain-containing protein / clathrin assembly protein-related
15	qSG3_1Stable	SG	Chr03	82178743	82179536	Eucgr.C04401
16	qSG3_1Stable	SG	Chr03	82189315	82193104	Eucgr.C04402		receptor like protein 13
17	qSG3_1Stable	SG	Chr03	82194690	82196862	Eucgr.C04403		ubiquitin-associated (UBA)/TS-N domain-containing protein
18	qSG3_1Stable	SG	Chr03	82201570	82203604	Eucgr.C04404		ENTH/ANTH/VHS superfamily protein
19	qSG3_1Stable	SG	Chr03	82207943	82213847	Eucgr.C04405		receptor like protein 15
20	qSG3_1Stable	SG	Chr03	82235138	82239766	Eucgr.C04407		receptor like protein 15
21	qSG3_1Stable	SG	Chr03	82255599	82256490	Eucgr.C04409		ARP2/3 complex 16 kDa subunit (p16-Arc)
22	qSG3_1Stable	SG	Chr03	82261656	82262069	Eucgr.C04410		embryo defective 2759
23	qSG3_1Stable	SG	Chr03	82270542	82276072	Eucgr.C04412		receptor like protein 9
24	qSG3_1Stable	SG	Chr03	82294190	82296573	Eucgr.C04413		receptor like protein 9
25	qSG3_1Stable	SG	Chr03	82301271	82301870	Eucgr.C04414		ENTH/ANTH/VHS superfamily protein
26	qSG3_1Stable	SG	Chr03	82303398	82303828	Eucgr.C04415		epsin N-terminal homology (ENTH) domain-containing protein / clathrin assembly protein-related
27	qSG3_1Stable	SG	Chr03	82329903	82335452	Eucgr.C04416		receptor like protein 9
28	qSG3_1Stable	SG	Chr03	82372086	82377296	Eucgr.C04419		receptor like protein 15
29	qSG3_1Stable	SG	Chr03	82379925	82381844	Eucgr.C04420		epsin N-terminal homology (ENTH) domain-containing protein / clathrin assembly protein-related
30	qSG3_1Stable	SG	Chr03	82390929	82395089	Eucgr.C04421		receptor like protein 9
31	qSG3_1Stable	SG	Chr03	82411688	82412411	Eucgr.C04121
32	qSG3_1Stable	SG	Chr03	82417767	82421268	Eucgr.C04120		receptor like protein 56
33	qSG3_1Stable	SG	Chr03	82439668	82441046	Eucgr.C04116		receptor like protein 9
34	qSG3_1Stable	SG	Chr03	82449237	82450337	Eucgr.C04114		epsin N-terminal homology (ENTH) domain-containing protein / clathrin assembly protein-related
35	qSG3_1Stable	SG	Chr03	82470592	82472852	Eucgr.C04113		receptor like protein 9
36	qSG3_1Stable	SG	Chr03	82473286	82476192	Eucgr.C04112		receptor like protein 56
37	qSG3_1Stable	SG	Chr03	82494290	82494923	Eucgr.C04111
38	qSG3_1Stable	SG	Chr03	82519114	82523298	Eucgr.C04108		Major facilitator superfamily protein
39	qSG3_1Stable	SG	Chr03	82530880	82532943	Eucgr.C04107		chlororespiratory reduction 6
40	qSG3_1Stable	SG	Chr03	82544735	82545928	Eucgr.C04106
41	qSG3_1Stable	SG	Chr03	82591783	82598752	Eucgr.C04105		Ubiquitin-like superfamily protein
42	qSG3_1Stable	SG	Chr03	82634248	82636762	Eucgr.C04102		Cytochrome P450 superfamily protein
43	qSG3_1Stable	SG	Chr03	82641705	82643884	Eucgr.C04101		Cytochrome P450 superfamily protein
44	qSG3_1Stable	SG	Chr03	82669309	82671728	Eucgr.C04098		Cytochrome P450 superfamily protein
45	qSG3_1Stable	SG	Chr03	82676238	82679119	Eucgr.C04097		Cytochrome P450 superfamily protein
46	qSG3_1Stable	SG	Chr03	82714377	82714955	Eucgr.C04094		Polynucleotidyl transferase, ribonuclease H-like superfamily protein
47	qSG3_1Stable	SG	Chr03	82736209	82737800	Eucgr.C04093		F-box/RNI-like superfamily protein
48	qSG3_1Stable	SG	Chr03	82764909	82767468	Eucgr.C04092		Major facilitator superfamily protein
49	qSG3_1Stable	SG	Chr03	82775685	82781014	Eucgr.C04090		FRS (FAR1 Related Sequences) transcription factor family
50	qSG3_1Stable	SG	Chr03	82798747	82800702	Eucgr.C04088		RING/U-box superfamily protein
51	qSG3_1Stable	SG	Chr03	82802811	82804666	Eucgr.C04087
52	qSG3_1Stable	SG	Chr03	82830155	82831453	Eucgr.C04082		Cyclophilin-like peptidyl-prolyl cis-trans isomerase family protein
53	qSG3_1Stable	SG	Chr03	82878901	82879445	Eucgr.C04076		D111/G-patch domain-containing protein
54	qSG3_1Stable	SG	Chr03	82896167	82899832	Eucgr.C04075		receptor like protein 13
55	qSG3_1Stable	SG	Chr03	82913675	82915271	Eucgr.C04073		D111/G-patch domain-containing protein
56	qSG3_1Stable	SG	Chr03	82927925	82933426	Eucgr.C04071		receptor like protein 56
57	qSG3_1Stable	SG	Chr03	82938631	82943492	Eucgr.C04070		receptor like protein 56
58	qSG3_1Stable	SG	Chr03	82964838	82967342	Eucgr.C04068		receptor like protein 1
59	qSG3_1Stable	SG	Chr03	82975261	82977954	Eucgr.C04067		receptor like protein 15
60	qSG3_1Stable	SG	Chr03	82985357	82986477	Eucgr.C04066
61	qSG3_1Stable	SG	Chr03	82991903	82995399	Eucgr.C04064		sugar transporter protein 7
62	qSG3_1Stable	SG	Chr03	82996676	82997723	Eucgr.C04063
63	qSG3_1Stable	SG	Chr03	83028736	83033095	Eucgr.C04061		H(+)-ATPase 8
64	qSG3_1Stable	SG	Chr03	83037214	83038651	Eucgr.C04060		Glycosyl hydrolase family protein with chitinase insertion domain
65	qSG3_1Stable	SG	Chr03	83057251	83060249	Eucgr.C04059		heat shock protein 90.1
66	qSG3_1Stable	SG	Chr03	83087898	83088290	Eucgr.C04056		Bifunctional inhibitor/lipid-transfer protein/seed storage 2S albumin superfamily protein
67	qSG3_1Stable	SG	Chr03	83101080	83101855	Eucgr.C04055
68	qSG3_1Stable	SG	Chr03	83136774	83139344	Eucgr.C04052		disease resistance family protein / LRR family protein
69	qSG3_1Stable	SG	Chr03	83162262	83163838	Eucgr.C04051		Glycosyl hydrolase family protein with chitinase insertion domain
70	qSG3_1Stable	SG	Chr03	83173778	83177867	Eucgr.C04050		response regulator 12
71	qSG3_1Stable	SG	Chr03	82156777	82168810	Eucgr.C04398		Ankyrin repeat family protein with DHHC zinc finger domain
72	qSG3_1Stable	SG	Chr03	82264059	82264524	Eucgr.C04411
73	qSG3_1Stable	SG	Chr03	82508360	82511545	Eucgr.C04109		epsin N-terminal homology (ENTH) domain-containing protein / clathrin assembly protein-related
74	qSG3_1Stable	SG	Chr03	82768514	82774692	Eucgr.C04091		Ribosomal protein S5/Elongation factor G/III/V family protein
75	qSG3_1Stable	SG	Chr03	82785928	82791950	Eucgr.C04089		RING/U-box superfamily protein
76	qSG3_1Stable	SG	Chr03	82818287	82827676	Eucgr.C04084		Small nuclear ribonucleoprotein family protein
77	qSG3_1Stable	SG	Chr03	82850854	82856243	Eucgr.C04080		receptor like protein 9
78	qSG3_1Stable	SG	Chr03	82866560	82871981	Eucgr.C04078		RNI-like superfamily protein
79	qSG3_1Stable	SG	Chr03	82980895	82986686	Eucgr.C04065		D111/G-patch domain-containing protein
80	qSG3_1Stable	SG	Chr03	83000303	83026026	Eucgr.C04062		Protein of unknown function (DUF1336)
81	qSG3_1Stable	SG	Chr03	83115290	83116699	Eucgr.C04054		disease resistance family protein / LRR family protein
82	qSG3_1Stable	SG	Chr03	82443806	82445809	Eucgr.C04115		receptor like protein 15
83	qSG3_1Stable	SG	Chr03	82704832	82706918	Eucgr.C04095		F-box/RNI-like superfamily protein
84	qSG3_2Stable	SG	Chr03	81996268	82000118	Eucgr.C04379		monogalactosyldiacylglycerol synthase 2
85	qSG3_2Stable	SG	Chr03	82005366	82008450	Eucgr.C04380		MuDR family transposase
86	qSG3_2Stable	SG	Chr03	82010262	82013959	Eucgr.C04381		RING/U-box superfamily protein
87	qSG3_2Stable	SG	Chr03	82023134	82029629	Eucgr.C04383		Inorganic H pyrophosphatase family protein
88	qSG3_2Stable	SG	Chr03	82040985	82044232	Eucgr.C04384		vacuolar ATPase subunit F family protein
89	qSG3_2Stable	SG	Chr03	82046762	82048508	Eucgr.C04385		F-box/RNI-like superfamily protein
90	qSG3_2Stable	SG	Chr03	82061972	82062622	Eucgr.C04387
91	qSG3_2Stable	SG	Chr03	82074294	82075312	Eucgr.C04389		NAD(P)-binding Rossmann-fold superfamily protein
92	qSG3_2Stable	SG	Chr03	82092470	82093553	Eucgr.C04391		NAD(P)-binding Rossmann-fold superfamily protein
93	qSG3_2Stable	SG	Chr03	82106807	82109461	Eucgr.C04393		2-oxoglutarate (2OG) and Fe(II)-dependent oxygenase superfamily protein
94	qSG3_2Stable	SG	Chr03	82110945	82113492	Eucgr.C04394		2-oxoglutarate (2OG) and Fe(II)-dependent oxygenase superfamily protein
95	qSG3_2Stable	SG	Chr03	82134365	82138048	Eucgr.C04395		glucuronidase 3
96	qSG3_2Stable	SG	Chr03	82145529	82145924	Eucgr.C04396
97	qSG3_2Stable	SG	Chr03	82150464	82152363	Eucgr.C04397		ECA1 gametogenesis related family protein
98	qSG3_2Stable	SG	Chr03	82168874	82170221	Eucgr.C04399		ubiquitin-associated (UBA)/TS-N domain-containing protein
99	qSG3_2Stable	SG	Chr03	82177659	82178709	Eucgr.C04400		epsin N-terminal homology (ENTH) domain-containing protein / clathrin assembly protein-related
100	qSG3_2Stable	SG	Chr03	82178743	82179536	Eucgr.C04401
101	qSG3_2Stable	SG	Chr03	82189315	82193104	Eucgr.C04402		receptor like protein 13
102	qSG3_2Stable	SG	Chr03	82194690	82196862	Eucgr.C04403		ubiquitin-associated (UBA)/TS-N domain-containing protein
103	qSG3_2Stable	SG	Chr03	82201570	82203604	Eucgr.C04404		ENTH/ANTH/VHS superfamily protein
104	qSG3_2Stable	SG	Chr03	82207943	82213847	Eucgr.C04405		receptor like protein 15
105	qSG3_2Stable	SG	Chr03	82235138	82239766	Eucgr.C04407		receptor like protein 15
106	qSG3_2Stable	SG	Chr03	82255599	82256490	Eucgr.C04409		ARP2/3 complex 16 kDa subunit (p16-Arc)
107	qSG3_2Stable	SG	Chr03	82261656	82262069	Eucgr.C04410		embryo defective 2759
108	qSG3_2Stable	SG	Chr03	82270542	82276072	Eucgr.C04412		receptor like protein 9
109	qSG3_2Stable	SG	Chr03	82294190	82296573	Eucgr.C04413		receptor like protein 9
110	qSG3_2Stable	SG	Chr03	82301271	82301870	Eucgr.C04414		ENTH/ANTH/VHS superfamily protein
111	qSG3_2Stable	SG	Chr03	82303398	82303828	Eucgr.C04415		epsin N-terminal homology (ENTH) domain-containing protein / clathrin assembly protein-related
112	qSG3_2Stable	SG	Chr03	82329903	82335452	Eucgr.C04416		receptor like protein 9
113	qSG3_2Stable	SG	Chr03	82372086	82377296	Eucgr.C04419		receptor like protein 15
114	qSG3_2Stable	SG	Chr03	82379925	82381844	Eucgr.C04420		epsin N-terminal homology (ENTH) domain-containing protein / clathrin assembly protein-related
115	qSG3_2Stable	SG	Chr03	82390929	82395089	Eucgr.C04421		receptor like protein 9
116	qSG3_2Stable	SG	Chr03	82411688	82412411	Eucgr.C04121
117	qSG3_2Stable	SG	Chr03	82417767	82421268	Eucgr.C04120		receptor like protein 56
118	qSG3_2Stable	SG	Chr03	82439668	82441046	Eucgr.C04116		receptor like protein 9
119	qSG3_2Stable	SG	Chr03	82449237	82450337	Eucgr.C04114		epsin N-terminal homology (ENTH) domain-containing protein / clathrin assembly protein-related
120	qSG3_2Stable	SG	Chr03	82470592	82472852	Eucgr.C04113		receptor like protein 9
121	qSG3_2Stable	SG	Chr03	82473286	82476192	Eucgr.C04112		receptor like protein 56
122	qSG3_2Stable	SG	Chr03	82494290	82494923	Eucgr.C04111
123	qSG3_2Stable	SG	Chr03	82519114	82523298	Eucgr.C04108		Major facilitator superfamily protein
124	qSG3_2Stable	SG	Chr03	82530880	82532943	Eucgr.C04107		chlororespiratory reduction 6
125	qSG3_2Stable	SG	Chr03	82544735	82545928	Eucgr.C04106
126	qSG3_2Stable	SG	Chr03	82591783	82598752	Eucgr.C04105		Ubiquitin-like superfamily protein
127	qSG3_2Stable	SG	Chr03	82634248	82636762	Eucgr.C04102		Cytochrome P450 superfamily protein
128	qSG3_2Stable	SG	Chr03	82641705	82643884	Eucgr.C04101		Cytochrome P450 superfamily protein
129	qSG3_2Stable	SG	Chr03	82669309	82671728	Eucgr.C04098		Cytochrome P450 superfamily protein
130	qSG3_2Stable	SG	Chr03	82676238	82679119	Eucgr.C04097		Cytochrome P450 superfamily protein
131	qSG3_2Stable	SG	Chr03	82714377	82714955	Eucgr.C04094		Polynucleotidyl transferase, ribonuclease H-like superfamily protein
132	qSG3_2Stable	SG	Chr03	82736209	82737800	Eucgr.C04093		F-box/RNI-like superfamily protein
133	qSG3_2Stable	SG	Chr03	82764909	82767468	Eucgr.C04092		Major facilitator superfamily protein
134	qSG3_2Stable	SG	Chr03	82775685	82781014	Eucgr.C04090		FRS (FAR1 Related Sequences) transcription factor family
135	qSG3_2Stable	SG	Chr03	82798747	82800702	Eucgr.C04088		RING/U-box superfamily protein
136	qSG3_2Stable	SG	Chr03	82802811	82804666	Eucgr.C04087
137	qSG3_2Stable	SG	Chr03	82830155	82831453	Eucgr.C04082		Cyclophilin-like peptidyl-prolyl cis-trans isomerase family protein
138	qSG3_2Stable	SG	Chr03	82878901	82879445	Eucgr.C04076		D111/G-patch domain-containing protein
139	qSG3_2Stable	SG	Chr03	82896167	82899832	Eucgr.C04075		receptor like protein 13
140	qSG3_2Stable	SG	Chr03	82913675	82915271	Eucgr.C04073		D111/G-patch domain-containing protein
141	qSG3_2Stable	SG	Chr03	82927925	82933426	Eucgr.C04071		receptor like protein 56
142	qSG3_2Stable	SG	Chr03	82938631	82943492	Eucgr.C04070		receptor like protein 56
143	qSG3_2Stable	SG	Chr03	82964838	82967342	Eucgr.C04068		receptor like protein 1
144	qSG3_2Stable	SG	Chr03	82975261	82977954	Eucgr.C04067		receptor like protein 15
145	qSG3_2Stable	SG	Chr03	82985357	82986477	Eucgr.C04066
146	qSG3_2Stable	SG	Chr03	82991903	82995399	Eucgr.C04064		sugar transporter protein 7
147	qSG3_2Stable	SG	Chr03	82996676	82997723	Eucgr.C04063
148	qSG3_2Stable	SG	Chr03	83028736	83033095	Eucgr.C04061		H(+)-ATPase 8
149	qSG3_2Stable	SG	Chr03	83037214	83038651	Eucgr.C04060		Glycosyl hydrolase family protein with chitinase insertion domain
150	qSG3_2Stable	SG	Chr03	83057251	83060249	Eucgr.C04059		heat shock protein 90.1
151	qSG3_2Stable	SG	Chr03	83087898	83088290	Eucgr.C04056		Bifunctional inhibitor/lipid-transfer protein/seed storage 2S albumin superfamily protein
152	qSG3_2Stable	SG	Chr03	83101080	83101855	Eucgr.C04055
153	qSG3_2Stable	SG	Chr03	83136774	83139344	Eucgr.C04052		disease resistance family protein / LRR family protein
154	qSG3_2Stable	SG	Chr03	83162262	83163838	Eucgr.C04051		Glycosyl hydrolase family protein with chitinase insertion domain
155	qSG3_2Stable	SG	Chr03	83173778	83177867	Eucgr.C04050		response regulator 12
156	qSG3_2Stable	SG	Chr03	83190037	83192103	Eucgr.C04048		Leucine-rich receptor-like protein kinase family protein
157	qSG3_2Stable	SG	Chr03	83216295	83221119	Eucgr.C04047		laccase 14
158	qSG3_2Stable	SG	Chr03	83256140	83256995	Eucgr.C04045
159	qSG3_2Stable	SG	Chr03	83265161	83270760	Eucgr.C04043		SNARE-like superfamily protein
160	qSG3_2Stable	SG	Chr03	83265161	83266894	Eucgr.C04044		temperature-induced lipocalin
161	qSG3_2Stable	SG	Chr03	83271925	83272371	Eucgr.C04042
162	qSG3_2Stable	SG	Chr03	81975185	81992643	Eucgr.C04378		target of rapamycin
163	qSG3_2Stable	SG	Chr03	82014356	82021198	Eucgr.C04382		RING/FYVE/PHD zinc finger superfamily protein
164	qSG3_2Stable	SG	Chr03	82063267	82067507	Eucgr.C04388		beta-hydroxyisobutyryl-CoA hydrolase 1
165	qSG3_2Stable	SG	Chr03	82079274	82083965	Eucgr.C04390		beta-hydroxyisobutyryl-CoA hydrolase 1
166	qSG3_2Stable	SG	Chr03	82156777	82168810	Eucgr.C04398		Ankyrin repeat family protein with DHHC zinc finger domain
167	qSG3_2Stable	SG	Chr03	82264059	82264524	Eucgr.C04411
168	qSG3_2Stable	SG	Chr03	82508360	82511545	Eucgr.C04109		epsin N-terminal homology (ENTH) domain-containing protein / clathrin assembly protein-related
169	qSG3_2Stable	SG	Chr03	82768514	82774692	Eucgr.C04091		Ribosomal protein S5/Elongation factor G/III/V family protein
170	qSG3_2Stable	SG	Chr03	82785928	82791950	Eucgr.C04089		RING/U-box superfamily protein
171	qSG3_2Stable	SG	Chr03	82818287	82827676	Eucgr.C04084		Small nuclear ribonucleoprotein family protein
172	qSG3_2Stable	SG	Chr03	82850854	82856243	Eucgr.C04080		receptor like protein 9
173	qSG3_2Stable	SG	Chr03	82866560	82871981	Eucgr.C04078		RNI-like superfamily protein
174	qSG3_2Stable	SG	Chr03	82980895	82986686	Eucgr.C04065		D111/G-patch domain-containing protein
175	qSG3_2Stable	SG	Chr03	83000303	83026026	Eucgr.C04062		Protein of unknown function (DUF1336)
176	qSG3_2Stable	SG	Chr03	83115290	83116699	Eucgr.C04054		disease resistance family protein / LRR family protein
177	qSG3_2Stable	SG	Chr03	83177964	83182206	Eucgr.C04049		Calmodulin-binding protein
178	qSG3_2Stable	SG	Chr03	82443806	82445809	Eucgr.C04115		receptor like protein 15
179	qSG3_2Stable	SG	Chr03	82704832	82706918	Eucgr.C04095		F-box/RNI-like superfamily protein
180	qSG6_1Stable	SG	Chr06	50092520	50092843	Eucgr.F03924
181	qSG6_1Stable	SG	Chr06	50097795	50099264	Eucgr.F03925		Transmembrane amino acid transporter family protein
182	qSG6_1Stable	SG	Chr06	50113226	50114830	Eucgr.F03927		Plant protein of unknown function (DUF247)
183	qSG6_1Stable	SG	Chr06	50121282	50122967	Eucgr.F03928		Plant protein of unknown function (DUF247)
184	qSG6_1Stable	SG	Chr06	50128502	50130282	Eucgr.F03929		Plant protein of unknown function (DUF247)
185	qSG6_1Stable	SG	Chr06	50143297	50144541	Eucgr.F03930		Plant protein of unknown function (DUF247)
186	qSG6_1Stable	SG	Chr06	50155144	50158676	Eucgr.F03932
187	qSG6_1Stable	SG	Chr06	50160350	50166897	Eucgr.F03933		isopropylmalate dehydrogenase 2
188	qSG6_1Stable	SG	Chr06	50190958	50191994	Eucgr.F03936		Pathogenesis-related thaumatin superfamily protein
189	qSG6_1Stable	SG	Chr06	50210498	50212353	Eucgr.F03937		Pathogenesis-related thaumatin superfamily protein
190	qSG6_1Stable	SG	Chr06	50213086	50213811	Eucgr.F03938
191	qSG6_1Stable	SG	Chr06	50234225	50236133	Eucgr.F03940		Pathogenesis-related thaumatin superfamily protein
192	qSG6_1Stable	SG	Chr06	50263708	50264583	Eucgr.F03941		Integrase-type DNA-binding superfamily protein
193	qSG6_1Stable	SG	Chr06	50267922	50272202	Eucgr.F03942
194	qSG6_1Stable	SG	Chr06	50274776	50278980	Eucgr.F03943		S15/NS1, RNA-binding protein
195	qSG6_1Stable	SG	Chr06	50279493	50281822	Eucgr.F03944		RNI-like superfamily protein
196	qSG6_1Stable	SG	Chr06	50285258	50288928	Eucgr.F03945		Protein kinase superfamily protein
197	qSG6_1Stable	SG	Chr06	50295035	50296005	Eucgr.F03947		Integrase-type DNA-binding superfamily protein
198	qSG6_1Stable	SG	Chr06	50301573	50308934	Eucgr.F03948		SUPPRESSOR OF AUXIN RESISTANCE 3
199	qSG6_1Stable	SG	Chr06	50309419	50314793	Eucgr.F03949		Domain of unknown function (DUF298)
200	qSG6_1Stable	SG	Chr06	50316149	50318216	Eucgr.F03950		PPPDE putative thiol peptidase family protein
201	qSG6_1Stable	SG	Chr06	50323576	50324726	Eucgr.F03951		C2H2 and C2HC zinc fingers superfamily protein
202	qSG6_1Stable	SG	Chr06	50341679	50347315	Eucgr.F03952		XH/XS domain-containing protein
203	qSG6_1Stable	SG	Chr06	50349681	50351334	Eucgr.F03953		Polynucleotidyl transferase, ribonuclease H-like superfamily protein
204	qSG6_1Stable	SG	Chr06	50354333	50356649	Eucgr.F03954		cinnamoyl coa reductase 1
205	qSG6_1Stable	SG	Chr06	50367606	50370240	Eucgr.F03955		WRKY DNA-binding protein 40
206	qSG6_1Stable	SG	Chr06	50370307	50376765	Eucgr.F03956		DNA glycosylase superfamily protein
207	qSG6_1Stable	SG	Chr06	50377027	50380754	Eucgr.F03957		NDH-dependent cyclic electron flow 1
208	qSG6_1Stable	SG	Chr06	50383401	50383853	Eucgr.F03959
209	qSG6_1Stable	SG	Chr06	50388747	50390696	Eucgr.F03960		Acyl-CoA N-acyltransferases (NAT) superfamily protein
210	qSG6_1Stable	SG	Chr06	50420665	50421090	Eucgr.F03962		NAC domain containing protein 19
211	qSG6_1Stable	SG	Chr06	50430836	50431246	Eucgr.F03963		NAC domain containing protein 28
212	qSG6_1Stable	SG	Chr06	50437469	50443411	Eucgr.F03965		Low PSII Accumulation 3
213	qSG6_1Stable	SG	Chr06	50452688	50455071	Eucgr.F03967		Protein kinase superfamily protein
214	qSG6_1Stable	SG	Chr06	50459129	50460518	Eucgr.F03968		early nodulin-like protein 17
215	qSG6_1Stable	SG	Chr06	50466542	50467275	Eucgr.F03970
216	qSG6_1Stable	SG	Chr06	50470027	50471630	Eucgr.F03971		Chaperone DnaJ-domain superfamily protein
217	qSG6_1Stable	SG	Chr06	50514001	50516389	Eucgr.F03974		hydroxycinnamoyl-CoA shikimate/quinate hydroxycinnamoyl transferase
218	qSG6_1Stable	SG	Chr06	50532503	50535786	Eucgr.F03975		Protease-associated (PA) RING/U-box zinc finger family protein
219	qSG6_1Stable	SG	Chr06	50549439	50551235	Eucgr.F03977		Chaperone DnaJ-domain superfamily protein
220	qSG6_1Stable	SG	Chr06	50554344	50556982	Eucgr.F03978		hydroxycinnamoyl-CoA shikimate/quinate hydroxycinnamoyl transferase
221	qSG6_1Stable	SG	Chr06	50582540	50585653	Eucgr.F03981		Leucine-rich receptor-like protein kinase family protein
222	qSG6_1Stable	SG	Chr06	50593896	50597323	Eucgr.F03982
223	qSG6_1Stable	SG	Chr06	50597576	50598373	Eucgr.F03983
224	qSG6_1Stable	SG	Chr06	50599714	50603659	Eucgr.F03984		zinc ion binding
225	qSG6_1Stable	SG	Chr06	50605313	50608779	Eucgr.F03985
226	qSG6_1Stable	SG	Chr06	50621007	50625126	Eucgr.F03987		ARIA-interacting double AP2 domain protein
227	qSG6_1Stable	SG	Chr06	50629098	50631957	Eucgr.F03988
228	qSG6_1Stable	SG	Chr06	50632325	50635203	Eucgr.F03989
229	qSG6_1Stable	SG	Chr06	50635975	50640225	Eucgr.F03990		Serinc-domain containing serine and sphingolipid biosynthesis protein
230	qSG6_1Stable	SG	Chr06	50644808	50649953	Eucgr.F03991		Protein kinase superfamily protein
231	qSG6_1Stable	SG	Chr06	50651181	50658410	Eucgr.F03992		Galactose mutarotase-like superfamily protein
232	qSG6_1Stable	SG	Chr06	50659789	50662193	Eucgr.F03993
233	qSG6_1Stable	SG	Chr06	50664118	50664890	Eucgr.F03994
234	qSG6_1Stable	SG	Chr06	50671531	50674027	Eucgr.F03995
235	qSG6_1Stable	SG	Chr06	50685776	50690416	Eucgr.F03997		zinc ion binding
236	qSG6_1Stable	SG	Chr06	50692498	50696340	Eucgr.F03998		Nucleolar GTP-binding protein
237	qSG6_1Stable	SG	Chr06	50692498	50692846	Eucgr.F03999
238	qSG6_1Stable	SG	Chr06	50707163	50707746	Eucgr.F04001
239	qSG6_1Stable	SG	Chr06	50711281	50716032	Eucgr.F04002		RNA-binding (RRM/RBD/RNP motifs) family protein
240	qSG6_1Stable	SG	Chr06	50716735	50717385	Eucgr.F04003
241	qSG6_1Stable	SG	Chr06	50719374	50721815	Eucgr.F04004		Pentatricopeptide repeat (PPR) superfamily protein
242	qSG6_1Stable	SG	Chr06	50728182	50731717	Eucgr.F04005		PEP1 receptor 1
243	qSG6_1Stable	SG	Chr06	50750750	50754150	Eucgr.F04007		PEP1 receptor 1
244	qSG6_1Stable	SG	Chr06	50763054	50766203	Eucgr.F04009		ATP synthase epsilon chain, mitochondrial
245	qSG6_1Stable	SG	Chr06	50778503	50781701	Eucgr.F04011
246	qSG6_1Stable	SG	Chr06	50782204	50786575	Eucgr.F04012		proton gradient regulation 7
247	qSG6_1Stable	SG	Chr06	50786968	50788112	Eucgr.F04013
248	qSG6_1Stable	SG	Chr06	50794058	50798687	Eucgr.F04015		Coatomer, beta subunit
249	qSG6_1Stable	SG	Chr06	50803997	50804629	Eucgr.F04016
250	qSG6_1Stable	SG	Chr06	50832359	50835412	Eucgr.F04018		Ribosomal protein L30/L7 family protein
251	qSG6_1Stable	SG	Chr06	50837109	50837309	Eucgr.F04019
252	qSG6_1Stable	SG	Chr06	50846226	50853860	Eucgr.F04021		alpha-mannosidase 1
253	qSG6_1Stable	SG	Chr06	50867762	50869043	Eucgr.F04023		B-box 32
254	qSG6_1Stable	SG	Chr06	50876422	50882448	Eucgr.F04025		Ubiquitin-specific protease family C19-related protein
255	qSG6_1Stable	SG	Chr06	50883892	50886867	Eucgr.F04026		Ubiquitin-specific protease family C19-related protein
256	qSG6_1Stable	SG	Chr06	50894114	50900861	Eucgr.F04027		RING/FYVE/PHD zinc finger superfamily protein
257	qSG6_1Stable	SG	Chr06	50907271	50914297	Eucgr.F04028		Ergosterol biosynthesis ERG4/ERG24 family
258	qSG6_1Stable	SG	Chr06	50914991	50917613	Eucgr.F04029
259	qSG6_1Stable	SG	Chr06	50925913	50929715	Eucgr.F04031		lipid-binding serum glycoprotein family protein
260	qSG6_1Stable	SG	Chr06	50944264	50948794	Eucgr.F04033		Pseudouridine synthase family protein
261	qSG6_1Stable	SG	Chr06	50974883	50979130	Eucgr.F04036		Protein kinase protein with adenine nucleotide alpha hydrolases-like domain
262	qSG6_1Stable	SG	Chr06	50989954	50995403	Eucgr.F04038		Terpenoid cyclases family protein
263	qSG6_1Stable	SG	Chr06	51014057	51019444	Eucgr.F04039		Terpenoid cyclases family protein
264	qSG6_1Stable	SG	Chr06	51056665	51062473	Eucgr.F04041		lanosterol synthase 1
265	qSG6_1Stable	SG	Chr06	51155932	51157320	Eucgr.F04044		basic helix-loop-helix (bHLH) DNA-binding superfamily protein
266	qSG6_1Stable	SG	Chr06	51241101	51246147	Eucgr.F04049		Terpenoid cyclases family protein
267	qSG6_1Stable	SG	Chr06	51259527	51265373	Eucgr.F04050		Terpenoid cyclases family protein
268	qSG6_1Stable	SG	Chr06	51285457	51286461	Eucgr.F04051
269	qSG6_1Stable	SG	Chr06	51301749	51307387	Eucgr.F04052		lupeol synthase 2
270	qSG6_1Stable	SG	Chr06	51329206	51329520	Eucgr.F04054
271	qSG6_1Stable	SG	Chr06	51339165	51339993	Eucgr.F04056		Glycosyl hydrolase superfamily protein
272	qSG6_1Stable	SG	Chr06	51341512	51341898	Eucgr.F04057
273	qSG6_1Stable	SG	Chr06	51344349	51346379	Eucgr.F04058		hAT transposon superfamily protein
274	qSG6_1Stable	SG	Chr06	51350451	51359381	Eucgr.F04059		Protein of unknown function, DUF547
275	qSG6_1Stable	SG	Chr06	51361392	51363369	Eucgr.F04060
276	qSG6_1Stable	SG	Chr06	51364048	51368539	Eucgr.F04061		high chlorophyll fluorescence phenotype 173
277	qSG6_1Stable	SG	Chr06	51369327	51378754	Eucgr.F04062		histone acetyltransferase of the CBP family 1
278	qSG6_1Stable	SG	Chr06	51379501	51380161	Eucgr.F04063
279	qSG6_1Stable	SG	Chr06	51380704	51381096	Eucgr.F04064
280	qSG6_1Stable	SG	Chr06	51383207	51383644	Eucgr.F04065		histone acetyltransferase of the CBP family 1
281	qSG6_1Stable	SG	Chr06	51385455	51392799	Eucgr.F04066		Enhancer of polycomb-like transcription factor protein
282	qSG6_1Stable	SG	Chr06	51386878	51388277	Eucgr.F04067
283	qSG6_1Stable	SG	Chr06	51400694	51403816	Eucgr.F04068		Protein phosphatase 2C family protein
284	qSG6_1Stable	SG	Chr06	51404761	51407091	Eucgr.F04069		CRINKLY4 related 4
285	qSG6_1Stable	SG	Chr06	51419159	51422761	Eucgr.F04071
286	qSG6_1Stable	SG	Chr06	51423223	51425058	Eucgr.F04072
287	qSG6_1Stable	SG	Chr06	51436904	51438474	Eucgr.F04074		Leucine-rich repeat (LRR) family protein
288	qSG6_1Stable	SG	Chr06	51463659	51466681	Eucgr.F04076		Leucine-rich repeat protein kinase family protein
289	qSG6_1Stable	SG	Chr06	51504956	51508238	Eucgr.F04077		Leucine-rich repeat protein kinase family protein
290	qSG6_1Stable	SG	Chr06	51529150	51532216	Eucgr.F04079
291	qSG6_1Stable	SG	Chr06	51544327	51544901	Eucgr.F04080
292	qSG6_1Stable	SG	Chr06	51570357	51573499	Eucgr.F04081		Leucine-rich repeat protein kinase family protein
293	qSG6_1Stable	SG	Chr06	51609975	51613212	Eucgr.F04082		Leucine-rich repeat protein kinase family protein
294	qSG6_1Stable	SG	Chr06	51621596	51622236	Eucgr.F04083
295	qSG6_1Stable	SG	Chr06	51643433	51646659	Eucgr.F04084		Leucine-rich repeat protein kinase family protein
296	qSG6_1Stable	SG	Chr06	51664898	51667977	Eucgr.F04086		RING/U-box superfamily protein
297	qSG6_1Stable	SG	Chr06	51669066	51671241	Eucgr.F04087		SNARE-like superfamily protein
298	qSG6_1Stable	SG	Chr06	51673395	51674169	Eucgr.F04088
299	qSG6_1Stable	SG	Chr06	51692368	51697023	Eucgr.F04091		cobalt ion binding
300	qSG6_1Stable	SG	Chr06	51697792	51699616	Eucgr.F04092		GDSL-like Lipase/Acylhydrolase superfamily protein
301	qSG6_1Stable	SG	Chr06	51701358	51705252	Eucgr.F04093		Major facilitator superfamily protein
302	qSG6_1Stable	SG	Chr06	51714793	51717687	Eucgr.F04094		Galactosyltransferase family protein
303	qSG6_1Stable	SG	Chr06	51719863	51723024	Eucgr.F04095		RING/FYVE/PHD zinc finger superfamily protein
304	qSG6_1Stable	SG	Chr06	51743606	51746598	Eucgr.F04097		NAC domain containing protein 70
305	qSG6_1Stable	SG	Chr06	51747129	51750850	Eucgr.F04098		monooxygenase 1
306	qSG6_1Stable	SG	Chr06	51763082	51765669	Eucgr.F04099		light harvesting complex of photosystem II 5
307	qSG6_1Stable	SG	Chr06	51766228	51768493	Eucgr.F04100		glycine-rich protein
308	qSG6_1Stable	SG	Chr06	51779868	51784571	Eucgr.F04101		Protein kinase family protein with leucine-rich repeat domain
309	qSG6_1Stable	SG	Chr06	51793935	51802278	Eucgr.F04102		P-loop containing nucleoside triphosphate hydrolases superfamily protein
310	qSG6_1Stable	SG	Chr06	51804743	51805014	Eucgr.F04103
311	qSG6_1Stable	SG	Chr06	51811287	51814573	Eucgr.F04106		RmlC-like cupins superfamily protein
312	qSG6_1Stable	SG	Chr06	51827173	51828834	Eucgr.F04108		Pentatricopeptide repeat (PPR) superfamily protein
313	qSG6_1Stable	SG	Chr06	51830350	51831593	Eucgr.F04109		HSP20-like chaperones superfamily protein
314	qSG6_1Stable	SG	Chr06	51832810	51835777	Eucgr.F04110		alpha/beta-Hydrolases superfamily protein
315	qSG6_1Stable	SG	Chr06	51852418	51854931	Eucgr.F04112		cytochrome P450, family 716, subfamily A, polypeptide 1
316	qSG6_1Stable	SG	Chr06	51860523	51864587	Eucgr.F04113		RING/U-box protein with domain of unknown function (DUF 1232)
317	qSG6_1Stable	SG	Chr06	51868461	51871689	Eucgr.F04114		SEC14 cytosolic factor family protein / phosphoglyceride transfer family protein
318	qSG6_1Stable	SG	Chr06	51884753	51886415	Eucgr.F04115		late embryogenesis abundant domain-containing protein / LEA domain-containing protein
319	qSG6_1Stable	SG	Chr06	51890686	51894342	Eucgr.F04116		C2 calcium/lipid-binding plant phosphoribosyltransferase family protein
320	qSG6_1Stable	SG	Chr06	51895429	51899178	Eucgr.F04117		Glycosyltransferase family 29 (sialyltransferase) family protein
321	qSG6_1Stable	SG	Chr06	51901050	51901681	Eucgr.F04118		vacuolar ATP synthase G3
322	qSG6_1Stable	SG	Chr06	51905302	51906209	Eucgr.F04119		basic helix-loop-helix (bHLH) DNA-binding superfamily protein
323	qSG6_1Stable	SG	Chr06	51909331	51918881	Eucgr.F04120		N-terminal nucleophile aminohydrolases (Ntn hydrolases) superfamily protein
324	qSG6_1Stable	SG	Chr06	51931356	51935803	Eucgr.F04123
325	qSG6_1Stable	SG	Chr06	51938403	51947182	Eucgr.F04124		DNAJ heat shock N-terminal domain-containing protein
326	qSG6_1Stable	SG	Chr06	51948122	51949108	Eucgr.F04125		GAST1 protein homolog 3
327	qSG6_1Stable	SG	Chr06	51957958	51960388	Eucgr.F04127		monooxygenase 1
328	qSG6_1Stable	SG	Chr06	51962284	51963137	Eucgr.F04128
329	qSG6_1Stable	SG	Chr06	51976483	51978674	Eucgr.F04130		leucine-rich repeat transmembrane protein kinase family protein
330	qSG6_1Stable	SG	Chr06	52007973	52011250	Eucgr.F04133		leucine-rich repeat transmembrane protein kinase family protein
331	qSG6_1Stable	SG	Chr06	52012730	52015433	Eucgr.F04134		2-oxoacid dehydrogenases acyltransferase family protein
332	qSG6_1Stable	SG	Chr06	52029773	52033491	Eucgr.F04135		5\'-3\' exonuclease family protein
333	qSG6_1Stable	SG	Chr06	52042655	52045134	Eucgr.F04137		sucrose-proton symporter 2
334	qSG6_1Stable	SG	Chr06	52053573	52056223	Eucgr.F04138		sucrose-proton symporter 2
335	qSG6_1Stable	SG	Chr06	52056231	52056506	Eucgr.F04139
336	qSG6_1Stable	SG	Chr06	52070468	52078841	Eucgr.F04140		Protein of unknown function (DUF668)
337	qSG6_1Stable	SG	Chr06	52085235	52092061	Eucgr.F04141	Eucgr.F04141	Protein of unknown function (DUF668)
338	qSG6_1Stable	SG	Chr06	52107303	52107803	Eucgr.F04143
339	qSG6_1Stable	SG	Chr06	52144110	52148024	Eucgr.F04144	Eucgr.F04144	sucrose-proton symporter 2
340	qSG6_1Stable	SG	Chr06	52155890	52158485	Eucgr.F04146		lectin protein kinase family protein
341	qSG6_1Stable	SG	Chr06	52163882	52164711	Eucgr.F04147
342	qSG6_1Stable	SG	Chr06	52164897	52165190	Eucgr.F04148
343	qSG6_1Stable	SG	Chr06	52171488	52176162	Eucgr.F04150		Regulator of Vps4 activity in the MVB pathway protein
344	qSG6_1Stable	SG	Chr06	52193113	52196489	Eucgr.F04152		lectin protein kinase family protein
345	qSG6_1Stable	SG	Chr06	52225623	52229916	Eucgr.F04154		laccase 14
346	qSG6_1Stable	SG	Chr06	52273846	52278238	Eucgr.F04158		laccase 14
347	qSG6_1Stable	SG	Chr06	52290811	52292425	Eucgr.F04159		laccase 14
348	qSG6_1Stable	SG	Chr06	52298825	52303493	Eucgr.F04160		laccase 14
349	qSG6_1Stable	SG	Chr06	52367643	52368981	Eucgr.F04164
350	qSG6_1Stable	SG	Chr06	52375967	52378282	Eucgr.F04165
351	qSG6_1Stable	SG	Chr06	52403607	52404104	Eucgr.F04168		Serine protease inhibitor, potato inhibitor I-type family protein
352	qSG6_1Stable	SG	Chr06	52414926	52419942	Eucgr.F04169		NAD(P)-binding Rossmann-fold superfamily protein
353	qSG6_1Stable	SG	Chr06	52421391	52424056	Eucgr.F04170		Disease resistance protein (CC-NBS-LRR class) family
354	qSG6_1Stable	SG	Chr06	52430104	52435123	Eucgr.F04171		NAD(P)-binding Rossmann-fold superfamily protein
355	qSG6_1Stable	SG	Chr06	52435840	52439213	Eucgr.F04172		Disease resistance protein (CC-NBS-LRR class) family
356	qSG6_1Stable	SG	Chr06	52501710	52504280	Eucgr.F04174		NAD(P)-binding Rossmann-fold superfamily protein
357	qSG6_1Stable	SG	Chr06	52518270	52521906	Eucgr.F04176		choline kinase 1
358	qSG6_1Stable	SG	Chr06	52528880	52533860	Eucgr.F04177		Leucine-rich repeat transmembrane protein kinase
359	qSG6_1Stable	SG	Chr06	52563705	52567829	Eucgr.F04178		Leucine-rich repeat transmembrane protein kinase
360	qSG6_1Stable	SG	Chr06	52600593	52608310	Eucgr.F04181		S-adenosylmethionine carrier 1
361	qSG6_1Stable	SG	Chr06	52603579	52603999	Eucgr.F04182
362	qSG6_1Stable	SG	Chr06	52609138	52611509	Eucgr.F04183		Protein of unknown function (DUF3317)
363	qSG6_1Stable	SG	Chr06	52614953	52619246	Eucgr.F04184		Pyridoxal phosphate (PLP)-dependent transferases superfamily protein
364	qSG6_1Stable	SG	Chr06	52620479	52620845	Eucgr.F04185
365	qSG6_1Stable	SG	Chr06	52644681	52651647	Eucgr.F04188		carboxypeptidase D, putative
366	qSG6_1Stable	SG	Chr06	52655413	52657393	Eucgr.F04189		Ribosomal protein S13/S18 family
367	qSG6_1Stable	SG	Chr06	52659450	52662258	Eucgr.F04190		Nucleotide-sugar transporter family protein
368	qSG6_1Stable	SG	Chr06	52675653	52676389	Eucgr.F04192
369	qSG6_1Stable	SG	Chr06	52681863	52682795	Eucgr.F04193
370	qSG6_1Stable	SG	Chr06	52682005	52685914	Eucgr.F04194		Protein kinase superfamily protein
371	qSG6_1Stable	SG	Chr06	52686799	52690585	Eucgr.F04195		Peroxidase superfamily protein
372	qSG6_1Stable	SG	Chr06	52712427	52715973	Eucgr.F04198	Eucgr.F04198	Peroxidase superfamily protein
373	qSG6_1Stable	SG	Chr06	52724760	52725443	Eucgr.F04199
374	qSG6_1Stable	SG	Chr06	52725818	52726895	Eucgr.F04200		Protein kinase superfamily protein
375	qSG6_1Stable	SG	Chr06	52746561	52753979	Eucgr.F04202		DHHC-type zinc finger family protein
376	qSG6_1Stable	SG	Chr06	52759507	52763495	Eucgr.F04203		Integrase-type DNA-binding superfamily protein
377	qSG6_1Stable	SG	Chr06	52794640	52795857	Eucgr.F04204
378	qSG6_1Stable	SG	Chr06	52806998	52811565	Eucgr.F04206
379	qSG6_1Stable	SG	Chr06	52812038	52815285	Eucgr.F04207		Protein of unknown function (DUF616)
380	qSG6_1Stable	SG	Chr06	52816484	52820281	Eucgr.F04208		R-protein L3 B
381	qSG6_1Stable	SG	Chr06	52851434	52852037	Eucgr.F04210
382	qSG6_1Stable	SG	Chr06	52858050	52864263	Eucgr.F04212		cellulose synthase 6
383	qSG6_1Stable	SG	Chr06	52871805	52873538	Eucgr.F04214		Pentatricopeptide repeat (PPR) superfamily protein
384	qSG6_1Stable	SG	Chr06	52873754	52874900	Eucgr.F04215
385	qSG6_1Stable	SG	Chr06	52875150	52881870	Eucgr.F04216		cellulose synthase 6
386	qSG6_1Stable	SG	Chr06	52875344	52876805	Eucgr.F04217
387	qSG6_1Stable	SG	Chr06	52889755	52891259	Eucgr.F04219
388	qSG6_1Stable	SG	Chr06	52907220	52910956	Eucgr.F04220		camelliol C synthase 1
389	qSG6_1Stable	SG	Chr06	52913728	52916553	Eucgr.F04221	Eucgr.F04221	Disease resistance protein (CC-NBS-LRR class) family
390	qSG6_1Stable	SG	Chr06	52957701	52958321	Eucgr.F04223		thioredoxin Y2
391	qSG6_1Stable	SG	Chr06	52962544	52965686	Eucgr.F04224		Disease resistance protein (CC-NBS-LRR class) family
392	qSG6_1Stable	SG	Chr06	52988840	52990246	Eucgr.F04225		Disease resistance protein (CC-NBS-LRR class) family
393	qSG6_1Stable	SG	Chr06	52997581	52999869	Eucgr.F04226		camelliol C synthase 1
394	qSG6_1Stable	SG	Chr06	53004885	53007539	Eucgr.F04228		Disease resistance protein (CC-NBS-LRR class) family
395	qSG6_1Stable	SG	Chr06	53013812	53017385	Eucgr.F04229		thioredoxin Y1
396	qSG6_1Stable	SG	Chr06	53025250	53026018	Eucgr.F04231
397	qSG6_1Stable	SG	Chr06	53032592	53033337	Eucgr.F04233
398	qSG6_1Stable	SG	Chr06	53061766	53064182	Eucgr.F04235		Cupredoxin superfamily protein
399	qSG6_1Stable	SG	Chr06	53068366	53070202	Eucgr.F04236
400	qSG6_1Stable	SG	Chr06	53075705	53083560	Eucgr.F04237
401	qSG6_1Stable	SG	Chr06	53091490	53099136	Eucgr.F04238		tubby like protein 1
402	qSG6_1Stable	SG	Chr06	53105988	53109996	Eucgr.F04239		Duplicated homeodomain-like superfamily protein
403	qSG6_1Stable	SG	Chr06	53125052	53127299	Eucgr.F04240		sequence-specific DNA binding transcription factors
404	qSG6_1Stable	SG	Chr06	53156602	53158913	Eucgr.F04243		cytochrome P450, family 722, subfamily A, polypeptide 1
405	qSG6_1Stable	SG	Chr06	53177519	53180170	Eucgr.F04244		Disease resistance protein (CC-NBS-LRR class) family
406	qSG6_1Stable	SG	Chr06	53211008	53212074	Eucgr.F04245
407	qSG6_1Stable	SG	Chr06	53211782	53214293	Eucgr.F04246		cytochrome P450, family 707, subfamily A, polypeptide 3
408	qSG6_1Stable	SG	Chr06	53217924	53219562	Eucgr.F04247
409	qSG6_1Stable	SG	Chr06	53249513	53252952	Eucgr.F04249		Disease resistance protein (CC-NBS-LRR class) family
410	qSG6_1Stable	SG	Chr06	53276652	53277789	Eucgr.F04251		cytochrome P450, family 722, subfamily A, polypeptide 1
411	qSG6_1Stable	SG	Chr06	53287557	53287992	Eucgr.F04252		RPS5-like 1
412	qSG6_1Stable	SG	Chr06	53299388	53302178	Eucgr.F04253		Disease resistance protein (CC-NBS-LRR class) family
413	qSG6_1Stable	SG	Chr06	53312186	53312579	Eucgr.F04254		Pyridoxal phosphate (PLP)-dependent transferases superfamily protein
414	qSG6_1Stable	SG	Chr06	53316435	53318436	Eucgr.F04255		cytochrome P450, family 707, subfamily A, polypeptide 3
415	qSG6_1Stable	SG	Chr06	53320680	53324251	Eucgr.F04256		Disease resistance protein (CC-NBS-LRR class) family
416	qSG6_1Stable	SG	Chr06	53331653	53335114	Eucgr.F04257		Pyridoxal phosphate (PLP)-dependent transferases superfamily protein
417	qSG6_1Stable	SG	Chr06	53343866	53345959	Eucgr.F04258		Concanavalin A-like lectin protein kinase family protein
418	qSG6_1Stable	SG	Chr06	53347503	53348903	Eucgr.F04259		Mitochondrial substrate carrier family protein
419	qSG6_1Stable	SG	Chr06	53363245	53366656	Eucgr.F04261
420	qSG6_1Stable	SG	Chr06	53365037	53365484	Eucgr.F04262
421	qSG6_1Stable	SG	Chr06	53373108	53374944	Eucgr.F04263		plant glycogenin-like starch initiation protein 2
422	qSG6_1Stable	SG	Chr06	53373145	53373605	Eucgr.F04264
423	qSG6_1Stable	SG	Chr06	53384940	53391250	Eucgr.F04265		Auxin efflux carrier family protein
424	qSG6_1Stable	SG	Chr06	53393500	53393830	Eucgr.F04266
425	qSG6_1Stable	SG	Chr06	53398636	53400967	Eucgr.F04267		Peroxidase superfamily protein
426	qSG6_1Stable	SG	Chr06	53422192	53423739	Eucgr.F04268		Nodulin MtN3 family protein
427	qSG6_1Stable	SG	Chr06	53433507	53434870	Eucgr.F04269		Nodulin MtN3 family protein
428	qSG6_1Stable	SG	Chr06	53450668	53452208	Eucgr.F04270		Nodulin MtN3 family protein
429	qSG6_1Stable	SG	Chr06	53494358	53495330	Eucgr.F04272		Nodulin MtN3 family protein
430	qSG6_1Stable	SG	Chr06	53499735	53501381	Eucgr.F04273		Nodulin MtN3 family protein
431	qSG6_1Stable	SG	Chr06	53503585	53505193	Eucgr.F04274		Nodulin MtN3 family protein
432	qSG6_1Stable	SG	Chr06	53515430	53524448	Eucgr.F04275		SEUSS transcriptional co-regulator
433	qSG6_1Stable	SG	Chr06	53528051	53531508	Eucgr.F04276		SCARECROW-like 1
434	qSG6_1Stable	SG	Chr06	53544307	53545945	Eucgr.F04277		myb domain protein 52
435	qSG6_1Stable	SG	Chr06	53562538	53563405	Eucgr.F04279		plantacyanin
436	qSG6_1Stable	SG	Chr06	53596160	53604457	Eucgr.F04281		Target of Myb protein 1
437	qSG6_1Stable	SG	Chr06	53627579	53634237	Eucgr.F04283		Target of Myb protein 1
438	qSG6_1Stable	SG	Chr06	53649700	53657271	Eucgr.F04285		S-adenosyl-L-methionine-dependent methyltransferases superfamily protein
439	qSG6_1Stable	SG	Chr06	53662602	53670107	Eucgr.F04286		S-adenosyl-L-methionine-dependent methyltransferases superfamily protein
440	qSG6_1Stable	SG	Chr06	53675450	53679254	Eucgr.F04287		wall associated kinase 3
441	qSG6_1Stable	SG	Chr06	53715375	53717149	Eucgr.F04289		wall associated kinase 3
442	qSG6_1Stable	SG	Chr06	53722432	53722964	Eucgr.F04290
443	qSG6_1Stable	SG	Chr06	53733502	53737117	Eucgr.F04291		wall associated kinase 5
444	qSG6_1Stable	SG	Chr06	53813076	53816698	Eucgr.F04292		wall associated kinase 3
445	qSG6_1Stable	SG	Chr06	53883159	53886855	Eucgr.F04294		wall-associated kinase 2
446	qSG6_1Stable	SG	Chr06	53924175	53927901	Eucgr.F04297		wall-associated kinase 2
447	qSG6_1Stable	SG	Chr06	53960136	53964156	Eucgr.F04298		wall-associated kinase 2
448	qSG6_1Stable	SG	Chr06	53975405	53976699	Eucgr.F04299		WALL ASSOCIATED KINASE (WAK)-LIKE 10
449	qSG6_1Stable	SG	Chr06	54055188	54057638	Eucgr.E00933		Disease resistance protein (CC-NBS-LRR class) family
450	qSG6_1Stable	SG	Chr06	54059952	54061425	Eucgr.E00934		regulatory particle non-ATPase 12A
451	qSG6_1Stable	SG	Chr06	54081435	54082033	Eucgr.E00937
452	qSG6_1Stable	SG	Chr06	54107883	54109528	Eucgr.E00938		ABL interactor-like protein 3
453	qSG6_1Stable	SG	Chr06	54143628	54147079	Eucgr.E00942		Disease resistance protein (CC-NBS-LRR class) family
454	qSG6_1Stable	SG	Chr06	54150120	54151667	Eucgr.E00943		regulatory particle non-ATPase 12B
455	qSG6_1Stable	SG	Chr06	54158237	54158935	Eucgr.E00945
456	qSG6_1Stable	SG	Chr06	54197702	54197932	Eucgr.E00946		ribosomal protein S2
457	qSG6_1Stable	SG	Chr06	54224690	54225117	Eucgr.E00949		Plant self-incompatibility protein S1 family
458	qSG6_1Stable	SG	Chr06	54228687	54230795	Eucgr.E00951		ABL interactor-like protein 3
459	qSG6_1Stable	SG	Chr06	54236860	54240579	Eucgr.E00952		Disease resistance protein (CC-NBS-LRR class) family
460	qSG6_1Stable	SG	Chr06	54240781	54241582	Eucgr.E00953
461	qSG6_1Stable	SG	Chr06	54245610	54246534	Eucgr.E00954
462	qSG6_1Stable	SG	Chr06	54248835	54250482	Eucgr.E00955		ABL interactor-like protein 3
463	qSG6_1Stable	SG	Chr06	54252085	54257823	Eucgr.E00956
464	qSG6_1Stable	SG	Chr06	54289841	54294043	Eucgr.E00958		NB-ARC domain-containing disease resistance protein
465	qSG6_1Stable	SG	Chr06	54320627	54324314	Eucgr.E00960		Disease resistance protein (CC-NBS-LRR class) family
466	qSG6_1Stable	SG	Chr06	54327333	54328106	Eucgr.E00961		regulatory particle non-ATPase 12B
467	qSG6_1Stable	SG	Chr06	54331833	54333946	Eucgr.E00962		ABL interactor-like protein 2
468	qSG6_1Stable	SG	Chr06	54337673	54339179	Eucgr.E00963		NB-ARC domain-containing disease resistance protein
469	qSG6_1Stable	SG	Chr06	54371156	54373503	Eucgr.E00965		Disease resistance protein (CC-NBS-LRR class) family
470	qSG6_1Stable	SG	Chr06	54371480	54373836	Eucgr.E00966
471	qSG6_1Stable	SG	Chr06	54388795	54392462	Eucgr.E00968		Disease resistance protein (CC-NBS-LRR class) family
472	qSG6_1Stable	SG	Chr06	54399980	54401189	Eucgr.E00969
473	qSG6_1Stable	SG	Chr06	54401236	54401762	Eucgr.E00970
474	qSG6_1Stable	SG	Chr06	54418296	54418937	Eucgr.E00971
475	qSG6_1Stable	SG	Chr06	54435957	54437097	Eucgr.E00974
476	qSG6_1Stable	SG	Chr06	54438611	54440126	Eucgr.E00975		NB-ARC domain-containing disease resistance protein
477	qSG6_1Stable	SG	Chr06	54583450	54585388	Eucgr.E00977		wall-associated kinase 2
478	qSG6_1Stable	SG	Chr06	54601754	54605202	Eucgr.E00978		C2H2-like zinc finger protein
479	qSG6_1Stable	SG	Chr06	54663842	54664630	Eucgr.E00980		wall associated kinase-like 1
480	qSG6_1Stable	SG	Chr06	54681489	54685065	Eucgr.E00983		BTB/POZ domain-containing protein
481	qSG6_1Stable	SG	Chr06	54686755	54688008	Eucgr.E00984		BTB/POZ domain-containing protein
482	qSG6_1Stable	SG	Chr06	54694935	54695738	Eucgr.E00985		BTB/POZ domain-containing protein
483	qSG6_1Stable	SG	Chr06	54718380	54719266	Eucgr.E00987		nuclear RNA polymerase C2
484	qSG6_1Stable	SG	Chr06	54729347	54731870	Eucgr.E00988		BTB/POZ domain-containing protein
485	qSG6_1Stable	SG	Chr06	54782610	54783274	Eucgr.E00990		Calcium-binding EF-hand family protein
486	qSG6_1Stable	SG	Chr06	54798127	54798384	Eucgr.E00991		ATP synthase subunit C family protein
487	qSG6_1Stable	SG	Chr06	54798664	54801511	Eucgr.E00992		BTB/POZ domain-containing protein
488	qSG6_1Stable	SG	Chr06	54905309	54907253	Eucgr.E00996		BTB/POZ domain-containing protein
489	qSG6_1Stable	SG	Chr06	54920883	54921424	Eucgr.E00998
490	qSG6_1Stable	SG	Chr06	54948977	54951563	Eucgr.E01000
491	qSG6_1Stable	SG	Chr06	54956767	54957405	Eucgr.E01001		Calcium-binding EF-hand family protein
492	qSG6_1Stable	SG	Chr06	54963493	54966951	Eucgr.E01002
493	qSG6_1Stable	SG	Chr06	55003061	55006847	Eucgr.E01006		K-box region and MADS-box transcription factor family protein
494	qSG6_1Stable	SG	Chr06	55008658	55012020	Eucgr.E01007		K-box region and MADS-box transcription factor family protein
495	qSG6_1Stable	SG	Chr06	55019486	55021321	Eucgr.E01008		Protein kinase superfamily protein
496	qSG6_1Stable	SG	Chr06	55036517	55038496	Eucgr.E01010
497	qSG6_1Stable	SG	Chr06	55107052	55111848	Eucgr.F04300		Leucine-rich repeat transmembrane protein kinase
498	qSG6_1Stable	SG	Chr06	55118485	55122360	Eucgr.F04301		Leucine-rich repeat transmembrane protein kinase
499	qSG6_1Stable	SG	Chr06	55122572	55123329	Eucgr.F04302
500	qSG6_1Stable	SG	Chr06	55124553	55127156	Eucgr.F04303		HOPW1-1-interacting 1
501	qSG6_1Stable	SG	Chr06	55138721	55142572	Eucgr.F04306		Leucine-rich repeat transmembrane protein kinase
502	qSG6_1Stable	SG	Chr06	55238746	55240477	Eucgr.F04309	Eucgr.F04309	disease resistance protein (TIR-NBS-LRR class), putative
503	qSG6_1Stable	SG	Chr06	55287772	55289532	Eucgr.F04310	Eucgr.F04310	disease resistance protein (TIR-NBS-LRR class), putative
504	qSG6_1Stable	SG	Chr06	55298811	55302348	Eucgr.F04311		disease resistance protein (TIR-NBS-LRR class), putative
505	qSG6_1Stable	SG	Chr06	55350126	55353242	Eucgr.F04312		transmembrane receptors;ATP binding
506	qSG6_1Stable	SG	Chr06	55354143	55361143	Eucgr.F04313		target of AVRB operation1
507	qSG6_1Stable	SG	Chr06	55364893	55369792	Eucgr.F04314		disease resistance protein (TIR-NBS-LRR class)
508	qSG6_1Stable	SG	Chr06	55372007	55374957	Eucgr.F04315		histidine kinase 3
509	qSG6_1Stable	SG	Chr06	55415009	55417135	Eucgr.F04316		WRKY family transcription factor
510	qSG6_1Stable	SG	Chr06	55420522	55422560	Eucgr.F04317		WRKY DNA-binding protein 40
511	qSG6_1Stable	SG	Chr06	55438954	55439328	Eucgr.F04318
512	qSG6_1Stable	SG	Chr06	55533648	55534022	Eucgr.F04319
513	qSG6_1Stable	SG	Chr06	55553022	55553504	Eucgr.F04320
514	qSG6_1Stable	SG	Chr06	55765249	55767032	Eucgr.F04325		amino acid permease 3
515	qSG6_1Stable	SG	Chr06	55798901	55800776	Eucgr.F04327		amino acid permease 3
516	qSG6_1Stable	SG	Chr06	55824203	55824887	Eucgr.F04328		Polynucleotidyl transferase, ribonuclease H-like superfamily protein
517	qSG6_1Stable	SG	Chr06	55832701	55836184	Eucgr.F04329	Eucgr.F04329	amino acid permease 3
518	qSG6_1Stable	SG	Chr06	55860652	55864171	Eucgr.F04330		DPP6 N-terminal domain-like protein
519	qSG6_1Stable	SG	Chr06	55872429	55878367	Eucgr.F04332		ATPase family associated with various cellular activities (AAA)
520	qSG6_1Stable	SG	Chr06	55879505	55880418	Eucgr.F04333
521	qSG6_1Stable	SG	Chr06	55881024	55884213	Eucgr.F04334		Pentatricopeptide repeat (PPR) superfamily protein
522	qSG6_1Stable	SG	Chr06	55884561	55885360	Eucgr.F04335
523	qSG6_1Stable	SG	Chr06	55891518	55896603	Eucgr.F04336		NRAMP metal ion transporter 6
524	qSG6_1Stable	SG	Chr06	55908943	55914021	Eucgr.F04337		NRAMP metal ion transporter 6
525	qSG6_1Stable	SG	Chr06	55922519	55923307	Eucgr.F04338		Restriction endonuclease, type II-like superfamily protein
526	qSG6_1Stable	SG	Chr06	55923609	55929754	Eucgr.F04339		proteasome beta subunit C1
527	qSG6_1Stable	SG	Chr06	55926591	55927018	Eucgr.F04340
528	qSG6_1Stable	SG	Chr06	55936462	55943687	Eucgr.F04341		NAC (No Apical Meristem) domain transcriptional regulator superfamily protein
529	qSG6_1Stable	SG	Chr06	55942284	55949032	Eucgr.F04342		replication factor C subunit 3
530	qSG6_1Stable	SG	Chr06	55952729	55953594	Eucgr.F04343		HSP40/DnaJ peptide-binding protein
531	qSG6_1Stable	SG	Chr06	55958372	55963979	Eucgr.F04344		thylakoidal ascorbate peroxidase
532	qSG6_1Stable	SG	Chr06	55975373	55976200	Eucgr.F04346		glycine-rich protein
533	qSG6_1Stable	SG	Chr06	55990878	55996381	Eucgr.F04348		Plant protein of unknown function (DUF869)
534	qSG6_1Stable	SG	Chr06	55991079	55991392	Eucgr.F04349
535	qSG6_1Stable	SG	Chr06	55996727	56000137	Eucgr.F04350		TRAM, LAG1 and CLN8 (TLC) lipid-sensing domain containing protein
536	qSG6_1Stable	SG	Chr06	56001676	56004876	Eucgr.F04351		BTB/POZ domain-containing protein
537	qSG6_1Stable	SG	Chr06	56009989	56012594	Eucgr.F04352
538	qSG6_1Stable	SG	Chr06	56039644	56043398	Eucgr.F04355		cation exchanger 11
539	qSG6_1Stable	SG	Chr06	56047591	56049499	Eucgr.F04356		Adenine nucleotide alpha hydrolases-like superfamily protein
540	qSG6_1Stable	SG	Chr06	56066303	56073094	Eucgr.F04357
541	qSG6_1Stable	SG	Chr06	56067454	56067904	Eucgr.F04358
542	qSG6_1Stable	SG	Chr06	56073372	56077709	Eucgr.F04359		ChaC-like family protein
543	qSG6_1Stable	SG	Chr06	56078737	56081320	Eucgr.F04360	Eucgr.F04360	nodulin MtN21 /EamA-like transporter family protein
544	qSG6_1Stable	SG	Chr06	56090284	56092779	Eucgr.F04361		nodulin MtN21 /EamA-like transporter family protein
545	qSG6_1Stable	SG	Chr06	56100218	56104389	Eucgr.F04362		emp24/gp25L/p24 family/GOLD family protein
546	qSG6_1Stable	SG	Chr06	56103732	56108832	Eucgr.F04363		Peptidase M20/M25/M40 family protein
547	qSG6_1Stable	SG	Chr06	56113466	56113934	Eucgr.F04364
548	qSG6_1Stable	SG	Chr06	56118101	56118795	Eucgr.F04365		Integrase-type DNA-binding superfamily protein
549	qSG6_1Stable	SG	Chr06	56125106	56126710	Eucgr.F04366	Eucgr.F04366	RING/U-box superfamily protein
550	qSG6_1Stable	SG	Chr06	56129537	56131036	Eucgr.F04367		organic cation/carnitine transporter 2
551	qSG6_1Stable	SG	Chr06	56138536	56140257	Eucgr.F04368		organic cation/carnitine transporter 3
552	qSG6_1Stable	SG	Chr06	56204349	56205468	Eucgr.F04371		Chalcone and stilbene synthase family protein
553	qSG6_1Stable	SG	Chr06	56222078	56228841	Eucgr.F04372		camphor resistance CrcB family protein
554	qSG6_1Stable	SG	Chr06	56265395	56266018	Eucgr.F04374		EF hand calcium-binding protein family
555	qSG6_1Stable	SG	Chr06	56270245	56272806	Eucgr.F04375		Protein of unknown function (DUF1644)
556	qSG6_1Stable	SG	Chr06	56287616	56292927	Eucgr.F04377
557	qSG6_1Stable	SG	Chr06	56299440	56305216	Eucgr.F04379		histone acetyltransferase of the MYST family 1
558	qSG6_1Stable	SG	Chr06	56314571	56319487	Eucgr.F04381
559	qSG6_1Stable	SG	Chr06	56324859	56326830	Eucgr.F04382		4-phospho-panto-thenoylcysteine synthetase
560	qSG6_1Stable	SG	Chr06	56331657	56337241	Eucgr.F04384		Co-chaperone GrpE family protein
561	qSG6_1Stable	SG	Chr06	56339629	56341751	Eucgr.F04385
562	qSG6_1Stable	SG	Chr06	56349995	56353325	Eucgr.F04386		Rhomboid-related intramembrane serine protease family protein
563	qSG6_1Stable	SG	Chr06	56368079	56370975	Eucgr.F04388		glycerol-3-phosphate acyltransferase 2
564	qSG6_1Stable	SG	Chr06	56380405	56383516	Eucgr.F04389		glycerol-3-phosphate acyltransferase 2
565	qSG6_1Stable	SG	Chr06	56418673	56421694	Eucgr.F04390		Leucine-rich repeat protein kinase family protein
566	qSG6_1Stable	SG	Chr06	56473788	56475113	Eucgr.F04392
567	qSG6_1Stable	SG	Chr06	56476418	56479523	Eucgr.F04393		Leucine-rich repeat protein kinase family protein
568	qSG6_1Stable	SG	Chr06	56484267	56487438	Eucgr.F04394
569	qSG6_1Stable	SG	Chr06	56500287	56500613	Eucgr.F04395
570	qSG6_1Stable	SG	Chr06	56515590	56518259	Eucgr.F04396		Leucine-rich repeat protein kinase family protein
571	qSG6_1Stable	SG	Chr06	56525782	56534602	Eucgr.F04397
572	qSG6_1Stable	SG	Chr06	56542800	56546923	Eucgr.F04398		20S proteasome subunit PAA2
573	qSG6_1Stable	SG	Chr06	56548471	56553735	Eucgr.F04399		Mono-/di-acylglycerol lipase, N-terminal;Lipase, class 3
574	qSG6_1Stable	SG	Chr06	56555705	56556215	Eucgr.F04400
575	qSG6_1Stable	SG	Chr06	56559166	56561141	Eucgr.F04401		Protein of unknown function (DUF1677)
576	qSG6_1Stable	SG	Chr06	56563879	56570922	Eucgr.F04402		aldehyde dehydrogenase 7B4
577	qSG6_1Stable	SG	Chr06	56580516	56583704	Eucgr.F04403		Cytochrome P450 superfamily protein
578	qSG6_1Stable	SG	Chr06	56593586	56597109	Eucgr.F04404		Cytochrome P450 superfamily protein
579	qSG6_1Stable	SG	Chr06	56603279	56605652	Eucgr.F04405		Cytochrome P450 superfamily protein
580	qSG6_1Stable	SG	Chr06	56607804	56614441	Eucgr.F04406		ARM repeat superfamily protein
581	qSG6_1Stable	SG	Chr06	56620472	56622684	Eucgr.F04407		Protein kinase superfamily protein
582	qSG6_1Stable	SG	Chr06	56634342	56638163	Eucgr.F04408		RELA/SPOT homolog 3
583	qSG6_1Stable	SG	Chr06	56635445	56635855	Eucgr.F04409
584	qSG6_1Stable	SG	Chr06	56655248	56655852	Eucgr.F04411
585	qSG6_1Stable	SG	Chr06	56673842	56676835	Eucgr.F04412		TRAF-like family protein
586	qSG6_1Stable	SG	Chr06	56691098	56691533	Eucgr.F04414
587	qSG6_1Stable	SG	Chr06	56706885	56710344	Eucgr.F04416		SECY homolog 1
588	qSG6_1Stable	SG	Chr06	56739781	56740571	Eucgr.F04417		germin 3
589	qSG6_1Stable	SG	Chr06	56741726	56742628	Eucgr.F04418
590	qSG6_1Stable	SG	Chr06	56743616	56748135	Eucgr.F04419		E3 Ubiquitin ligase family protein
591	qSG6_1Stable	SG	Chr06	56750179	56751283	Eucgr.F04420		growth-regulating factor 5
592	qSG6_1Stable	SG	Chr06	56771669	56775694	Eucgr.F04421		Integrase-type DNA-binding superfamily protein
593	qSG6_1Stable	SG	Chr06	56782501	56783257	Eucgr.F04422		myb domain protein 23
594	qSG6_1Stable	SG	Chr06	56790379	56791272	Eucgr.F04423		myb domain protein 23
595	qSG6_1Stable	SG	Chr06	56812127	56814149	Eucgr.F04424		LOB domain-containing protein 4
596	qSG6_1Stable	SG	Chr06	56830943	56835920	Eucgr.F04426
597	qSG6_1Stable	SG	Chr06	56836958	56840259	Eucgr.F04427		Tetratricopeptide repeat (TPR)-like superfamily protein
598	qSG6_1Stable	SG	Chr06	56840985	56844008	Eucgr.F04428		HOPW1-1-interacting 1
599	qSG6_1Stable	SG	Chr06	56845134	56845793	Eucgr.F04429
600	qSG6_1Stable	SG	Chr06	56851826	56852428	Eucgr.F04431
601	qSG6_1Stable	SG	Chr06	50078781	50087024	Eucgr.F03923		Transducin family protein / WD-40 repeat family protein
602	qSG6_1Stable	SG	Chr06	50102250	50106538	Eucgr.F03926		Major facilitator superfamily protein
603	qSG6_1Stable	SG	Chr06	50150165	50151913	Eucgr.F03931		Plant protein of unknown function (DUF247)
604	qSG6_1Stable	SG	Chr06	50167049	50169167	Eucgr.F03934		Pentatricopeptide repeat (PPR) superfamily protein
605	qSG6_1Stable	SG	Chr06	50174847	50186464	Eucgr.F03935		Pre-mRNA-processing-splicing factor
606	qSG6_1Stable	SG	Chr06	50380091	50382219	Eucgr.F03958		phospholipid N-methyltransferase
607	qSG6_1Stable	SG	Chr06	50394050	50411642	Eucgr.F03961	Eucgr.F03961	multidrug resistance-associated protein 11
608	qSG6_1Stable	SG	Chr06	50443730	50447729	Eucgr.F03966		cyclic nucleotide gated channel 8
609	qSG6_1Stable	SG	Chr06	50477637	50483059	Eucgr.F03972		hydroxycinnamoyl-CoA shikimate/quinate hydroxycinnamoyl transferase
610	qSG6_1Stable	SG	Chr06	50492976	50496349	Eucgr.F03973		hydroxycinnamoyl-CoA shikimate/quinate hydroxycinnamoyl transferase
611	qSG6_1Stable	SG	Chr06	50535975	50547692	Eucgr.F03976		Polynucleotide adenylyltransferase family protein
612	qSG6_1Stable	SG	Chr06	50560060	50566349	Eucgr.F03979		ATP-dependent RNA helicase, putative
613	qSG6_1Stable	SG	Chr06	50569822	50580464	Eucgr.F03980		heat shock protein 70B
614	qSG6_1Stable	SG	Chr06	50609496	50613560	Eucgr.F03986
615	qSG6_1Stable	SG	Chr06	50704572	50710396	Eucgr.F04000		D-3-phosphoglycerate dehydrogenase
616	qSG6_1Stable	SG	Chr06	50754779	50762376	Eucgr.F04008		exocyst complex component 84B
617	qSG6_1Stable	SG	Chr06	50773690	50776753	Eucgr.F04010		Cellulose-synthase-like C5
618	qSG6_1Stable	SG	Chr06	50790249	50792532	Eucgr.F04014	Eucgr.F04014	exocyst subunit exo70 family protein G1
619	qSG6_1Stable	SG	Chr06	50806180	50818520	Eucgr.F04017		autoinhibited Ca(2+)-ATPase 9
620	qSG6_1Stable	SG	Chr06	50837547	50845519	Eucgr.F04020		Cation efflux family protein
621	qSG6_1Stable	SG	Chr06	50871258	50876283	Eucgr.F04024		Pyridoxamine 5\'-phosphate oxidase family protein
622	qSG6_1Stable	SG	Chr06	50916814	50923446	Eucgr.F04030		vacuolar ATP synthase subunit A
623	qSG6_1Stable	SG	Chr06	50933199	50943829	Eucgr.F04032		pumilio 5
624	qSG6_1Stable	SG	Chr06	50949743	50967201	Eucgr.F04034		P-loop containing nucleoside triphosphate hydrolases superfamily protein
625	qSG6_1Stable	SG	Chr06	50970137	50971192	Eucgr.F04035		F-box family protein
626	qSG6_1Stable	SG	Chr06	51035014	51040849	Eucgr.F04040		Terpenoid cyclases family protein
627	qSG6_1Stable	SG	Chr06	51083128	51087259	Eucgr.F04042		Terpenoid cyclases family protein
628	qSG6_1Stable	SG	Chr06	51134146	51140330	Eucgr.F04043		lupeol synthase 1
629	qSG6_1Stable	SG	Chr06	51313692	51318951	Eucgr.F04053		Polyketide cyclase/dehydrase and lipid transport superfamily protein
630	qSG6_1Stable	SG	Chr06	51329899	51336284	Eucgr.F04055		myb-like HTH transcriptional regulator family protein
631	qSG6_1Stable	SG	Chr06	51408300	51415280	Eucgr.F04070		D-isomer specific 2-hydroxyacid dehydrogenase family protein
632	qSG6_1Stable	SG	Chr06	51427425	51433419	Eucgr.F04073		S-adenosyl-L-methionine-dependent methyltransferases superfamily protein
633	qSG6_1Stable	SG	Chr06	51445743	51458052	Eucgr.F04075		Protein kinase family protein with ARM repeat domain
634	qSG6_1Stable	SG	Chr06	51526526	51528151	Eucgr.F04078
635	qSG6_1Stable	SG	Chr06	51655430	51660178	Eucgr.F04085
636	qSG6_1Stable	SG	Chr06	51673621	51679428	Eucgr.F04089		RNA-binding (RRM/RBD/RNP motifs) family protein
637	qSG6_1Stable	SG	Chr06	51722168	51728486	Eucgr.F04096		Vacuolar sorting protein 9 (VPS9) domain
638	qSG6_1Stable	SG	Chr06	51805798	51807399	Eucgr.F04104		FAD-binding Berberine family protein
639	qSG6_1Stable	SG	Chr06	51814729	51823342	Eucgr.F04107		ATP-dependent Clp protease
640	qSG6_1Stable	SG	Chr06	51920226	51921074	Eucgr.F04121
641	qSG6_1Stable	SG	Chr06	51951548	51956235	Eucgr.F04126		Mitochondrial transcription termination factor family protein
642	qSG6_1Stable	SG	Chr06	51964362	51972006	Eucgr.F04129		Protein of unknown function (DUF803)
643	qSG6_1Stable	SG	Chr06	52148614	52154029	Eucgr.F04145		protein tyrosine phosphatase 1
644	qSG6_1Stable	SG	Chr06	52178219	52184473	Eucgr.F04151		somatic embryogenesis receptor-like kinase 1
645	qSG6_1Stable	SG	Chr06	52239335	52257134	Eucgr.F04156		SEC6
646	qSG6_1Stable	SG	Chr06	52263753	52265708	Eucgr.F04157		laccase 14
647	qSG6_1Stable	SG	Chr06	52340919	52346956	Eucgr.F04162		laccase 14
648	qSG6_1Stable	SG	Chr06	52361953	52366200	Eucgr.F04163		laccase 14
649	qSG6_1Stable	SG	Chr06	52379119	52382921	Eucgr.F04166		RAB GTPase homolog G3A
650	qSG6_1Stable	SG	Chr06	52574971	52581905	Eucgr.F04179		Leucine-rich repeat transmembrane protein kinase
651	qSG6_1Stable	SG	Chr06	52591100	52596782	Eucgr.F04180		Leucine-rich repeat transmembrane protein kinase
652	qSG6_1Stable	SG	Chr06	52625384	52628193	Eucgr.F04186		Pyridoxal phosphate (PLP)-dependent transferases superfamily protein
653	qSG6_1Stable	SG	Chr06	52640283	52643263	Eucgr.F04187		Pyridoxal phosphate (PLP)-dependent transferases superfamily protein
654	qSG6_1Stable	SG	Chr06	52670847	52676442	Eucgr.F04191
655	qSG6_1Stable	SG	Chr06	52739980	52741957	Eucgr.F04201		Protein kinase superfamily protein
656	qSG6_1Stable	SG	Chr06	52798643	52805886	Eucgr.F04205		polypyrimidine tract-binding protein 3
657	qSG6_1Stable	SG	Chr06	53001135	53002858	Eucgr.F04227
658	qSG6_1Stable	SG	Chr06	53018201	53023494	Eucgr.F04230		Sphingomyelin synthetase family protein
659	qSG6_1Stable	SG	Chr06	53129056	53136602	Eucgr.F04241		ubiquitin interaction motif-containing protein
660	qSG6_1Stable	SG	Chr06	53137316	53155105	Eucgr.F04242		Exocyst complex component SEC5
661	qSG6_1Stable	SG	Chr06	53357079	53363056	Eucgr.F04260		S-adenosyl-L-methionine-dependent methyltransferases superfamily protein
662	qSG6_1Stable	SG	Chr06	53591045	53594663	Eucgr.F04280		DNAJ heat shock N-terminal domain-containing protein
663	qSG6_1Stable	SG	Chr06	53703444	53707584	Eucgr.F04288		wall-associated kinase 2
664	qSG6_1Stable	SG	Chr06	54115285	54116921	Eucgr.E00939
665	qSG6_1Stable	SG	Chr06	54345566	54345947	Eucgr.E00964
666	qSG6_1Stable	SG	Chr06	54443271	54444880	Eucgr.E00976		regulatory particle non-ATPase 12A
667	qSG6_1Stable	SG	Chr06	54606180	54610175	Eucgr.E00979		wall associated kinase 5
668	qSG6_1Stable	SG	Chr06	54672884	54679351	Eucgr.E00982		RING/FYVE/PHD-type zinc finger family protein
669	qSG6_1Stable	SG	Chr06	54819601	54822688	Eucgr.E00993		BTB/POZ domain-containing protein
670	qSG6_1Stable	SG	Chr06	54849254	54858828	Eucgr.E00994		BTB/POZ domain-containing protein
671	qSG6_1Stable	SG	Chr06	54968182	54978566	Eucgr.E01003		Zinc finger C-x8-C-x5-C-x3-H type family protein
672	qSG6_1Stable	SG	Chr06	54981714	54986044	Eucgr.E01004		Protein kinase protein with adenine nucleotide alpha hydrolases-like domain
673	qSG6_1Stable	SG	Chr06	54999052	55001628	Eucgr.E01005		Glutathione S-transferase family protein
674	qSG6_1Stable	SG	Chr06	55030923	55038518	Eucgr.E01009		Chaperone DnaJ-domain superfamily protein
675	qSG6_1Stable	SG	Chr06	55080867	55083009	Eucgr.E01012		amino acid permease 2
676	qSG6_1Stable	SG	Chr06	55621420	55624918	Eucgr.F04321		Leucine-rich repeat receptor-like protein kinase family protein
677	qSG6_1Stable	SG	Chr06	55868290	55870226	Eucgr.F04331		with no lysine (K) kinase 6
678	qSG6_1Stable	SG	Chr06	55981313	55988330	Eucgr.F04347		F-box protein 7
679	qSG6_1Stable	SG	Chr06	56016304	56018343	Eucgr.F04353
680	qSG6_1Stable	SG	Chr06	56025866	56035245	Eucgr.F04354		long chain acyl-CoA synthetase 9
681	qSG6_1Stable	SG	Chr06	56241005	56251525	Eucgr.F04373		OSBP(oxysterol binding protein)-related protein 1C
682	qSG6_1Stable	SG	Chr06	56275192	56281271	Eucgr.F04376		3\'-5\'-exoribonuclease family protein
683	qSG6_1Stable	SG	Chr06	56294450	56298110	Eucgr.F04378
684	qSG6_1Stable	SG	Chr06	56309662	56312278	Eucgr.F04380	Eucgr.F04380	auxin response factor 17
685	qSG6_1Stable	SG	Chr06	56458816	56461747	Eucgr.F04391		Leucine-rich repeat protein kinase family protein
686	qSG6_1Stable	SG	Chr06	56638579	56639666	Eucgr.F04410
687	qSG6_1Stable	SG	Chr06	56817046	56830097	Eucgr.F04425		valyl-tRNA synthetase / valine--tRNA ligase (VALRS)
688	qSG6_1Stable	SG	Chr06	56846088	56859568	Eucgr.F04430		Leucine-rich repeat transmembrane protein kinase
689	qSG6_1Stable	SG	Chr06	50461281	50467275	Eucgr.F03969		magnesium transporter 2
690	qSG6_1Stable	SG	Chr06	50854475	50859956	Eucgr.F04022		RNA-binding KH domain-containing protein
691	qSG6_1Stable	SG	Chr06	50984099	50989240	Eucgr.F04037		Protein kinase protein with adenine nucleotide alpha hydrolases-like domain
692	qSG6_1Stable	SG	Chr06	52034225	52038251	Eucgr.F04136
693	qSG6_1Stable	SG	Chr06	52166558	52168352	Eucgr.F04149		ATP synthase delta-subunit gene
694	qSG6_1Stable	SG	Chr06	55047617	55050294	Eucgr.E01011		amino acid permease 2
695	qSG6_1Stable	SG	Chr06	55966995	55972233	Eucgr.F04345		PDI-like 1-1
696	qSG6_1Stable	SG	Chr06	56357672	56361197	Eucgr.F04387		electron carriers;protein disulfide oxidoreductases
697	qSG6_1Stable	SG	Chr06	56878674	56890048	Eucgr.F04434		Leucine-rich repeat transmembrane protein kinase
698	qSG6_2Stable	SG	Chr06	47883275	47888867	Eucgr.F03718		ATPase, V1 complex, subunit B protein
699	qSG6_2Stable	SG	Chr06	47894852	47897911	Eucgr.F03719		Thioredoxin superfamily protein
700	qSG6_2Stable	SG	Chr06	47899929	47903975	Eucgr.F03720		Alba DNA/RNA-binding protein
701	qSG6_2Stable	SG	Chr06	47904103	47904576	Eucgr.F03721
702	qSG6_2Stable	SG	Chr06	47912529	47914428	Eucgr.F03723		expansin 11
703	qSG6_2Stable	SG	Chr06	47916095	47918085	Eucgr.F03724		Peroxidase superfamily protein
704	qSG6_2Stable	SG	Chr06	47918412	47920943	Eucgr.F03725		Single hybrid motif superfamily protein
705	qSG6_2Stable	SG	Chr06	47921327	47922534	Eucgr.F03726		Protein of unknown function (DUF677)
706	qSG6_2Stable	SG	Chr06	47931789	47933280	Eucgr.F03727		Single hybrid motif superfamily protein
707	qSG6_2Stable	SG	Chr06	47934482	47935476	Eucgr.F03728		Protein of unknown function (DUF677)
708	qSG6_2Stable	SG	Chr06	47943237	47950723	Eucgr.F03729		MAPK/ERK kinase kinase 1
709	qSG6_2Stable	SG	Chr06	47995399	48000037	Eucgr.F03732		bZIP transcription factor family protein
710	qSG6_2Stable	SG	Chr06	48000693	48003405	Eucgr.F03733		Chaperone DnaJ-domain superfamily protein
711	qSG6_2Stable	SG	Chr06	48013718	48014755	Eucgr.F03734
712	qSG6_2Stable	SG	Chr06	48023338	48026710	Eucgr.F03736
713	qSG6_2Stable	SG	Chr06	48027171	48031246	Eucgr.F03737		Translation initiation factor IF2/IF5
714	qSG6_2Stable	SG	Chr06	48049507	48053883	Eucgr.F03738		Galactosyltransferase family protein
715	qSG6_2Stable	SG	Chr06	48054712	48060566	Eucgr.F03739		Vacuolar sorting protein 9 (VPS9) domain
716	qSG6_2Stable	SG	Chr06	48067058	48067856	Eucgr.F03740
717	qSG6_2Stable	SG	Chr06	48089811	48090953	Eucgr.F03742		Glycosyl hydrolase superfamily protein
718	qSG6_2Stable	SG	Chr06	48093502	48100324	Eucgr.F03743		MAPK/ERK kinase kinase 1
719	qSG6_2Stable	SG	Chr06	48128021	48129012	Eucgr.F03745
720	qSG6_2Stable	SG	Chr06	48137712	48139494	Eucgr.F03746		Ribosomal protein S13/S18 family
721	qSG6_2Stable	SG	Chr06	48163066	48167259	Eucgr.F03747		phosphatidylinositol-4-phosphate 5-kinase 1
722	qSG6_2Stable	SG	Chr06	48201866	48207932	Eucgr.F03750		holocarboxylase synthase 1
723	qSG6_2Stable	SG	Chr06	48209740	48215148	Eucgr.F03751		putative protein kinase 1
724	qSG6_2Stable	SG	Chr06	48219841	48221942	Eucgr.F03752		C2H2-like zinc finger protein
725	qSG6_2Stable	SG	Chr06	48224555	48228398	Eucgr.F03753		Pentatricopeptide repeat (PPR-like) superfamily protein
726	qSG6_2Stable	SG	Chr06	48243162	48247319	Eucgr.F03755
727	qSG6_2Stable	SG	Chr06	48245863	48246807	Eucgr.F03756
728	qSG6_2Stable	SG	Chr06	48248530	48249939	Eucgr.F03757	Eucgr.F03757	Pathogenesis-related thaumatin superfamily protein
729	qSG6_2Stable	SG	Chr06	48257675	48261691	Eucgr.F03758		like AUX1 3
730	qSG6_2Stable	SG	Chr06	48269316	48269594	Eucgr.F03759		cold shock domain protein 3
731	qSG6_2Stable	SG	Chr06	48286751	48289343	Eucgr.F03761		flavonol synthase 1
732	qSG6_2Stable	SG	Chr06	48300625	48301139	Eucgr.F03762
733	qSG6_2Stable	SG	Chr06	48357839	48363909	Eucgr.F03766		Ribonuclease II/R family protein
734	qSG6_2Stable	SG	Chr06	48368390	48371237	Eucgr.F03768
735	qSG6_2Stable	SG	Chr06	48393002	48394414	Eucgr.F03769		GRAS family transcription factor
736	qSG6_2Stable	SG	Chr06	48401433	48403820	Eucgr.F03771		Histone H3 K4-specific methyltransferase SET7/9 family protein
737	qSG6_2Stable	SG	Chr06	48410626	48411558	Eucgr.F03772		Integrase-type DNA-binding superfamily protein
738	qSG6_2Stable	SG	Chr06	48420973	48423408	Eucgr.F03773		Thioredoxin superfamily protein
739	qSG6_2Stable	SG	Chr06	48438954	48440019	Eucgr.F03775		nodulin MtN21 /EamA-like transporter family protein
740	qSG6_2Stable	SG	Chr06	48464878	48467315	Eucgr.F03776		Thioredoxin superfamily protein
741	qSG6_2Stable	SG	Chr06	48480688	48484019	Eucgr.F03778	Eucgr.F03778	nodulin MtN21 /EamA-like transporter family protein
742	qSG6_2Stable	SG	Chr06	48483149	48494546	Eucgr.F03779		Undecaprenyl pyrophosphate synthetase family protein
743	qSG6_2Stable	SG	Chr06	48500517	48503875	Eucgr.F03781		lysm domain GPI-anchored protein 1 precursor
744	qSG6_2Stable	SG	Chr06	48519743	48522984	Eucgr.F03782		P-loop containing nucleoside triphosphate hydrolases superfamily protein
745	qSG6_2Stable	SG	Chr06	48523797	48525880	Eucgr.F03783		S-adenosyl-L-methionine-dependent methyltransferases superfamily protein
746	qSG6_2Stable	SG	Chr06	48529779	48530237	Eucgr.F03785
747	qSG6_2Stable	SG	Chr06	48535952	48538587	Eucgr.F03786
748	qSG6_2Stable	SG	Chr06	48563418	48565967	Eucgr.F03789		Chlorophyll A-B binding family protein
749	qSG6_2Stable	SG	Chr06	48574086	48576545	Eucgr.F03790		F-box family protein
750	qSG6_2Stable	SG	Chr06	48599113	48603922	Eucgr.F03791		Pheophorbide a oxygenase family protein with Rieske [2Fe-2S] domain
751	qSG6_2Stable	SG	Chr06	48604209	48604562	Eucgr.F03792
752	qSG6_2Stable	SG	Chr06	48611729	48614818	Eucgr.F03794		O-methyltransferase 1
753	qSG6_2Stable	SG	Chr06	48646473	48651990	Eucgr.F03796		Aldolase superfamily protein
754	qSG6_2Stable	SG	Chr06	48662209	48664760	Eucgr.F03797		response regulator 3
755	qSG6_2Stable	SG	Chr06	48665964	48670948	Eucgr.F03798		Protein of unknown function (DUF630 and DUF632)
756	qSG6_2Stable	SG	Chr06	48694533	48695142	Eucgr.F03799		SWITCH/sucrose nonfermenting 3C
757	qSG6_2Stable	SG	Chr06	48718779	48725241	Eucgr.F03800		aldehyde dehydrogenase 3H1
758	qSG6_2Stable	SG	Chr06	48727152	48730628	Eucgr.F03801		Eukaryotic aspartyl protease family protein
759	qSG6_2Stable	SG	Chr06	48748400	48755801	Eucgr.F03803		P-loop containing nucleoside triphosphate hydrolases superfamily protein
760	qSG6_2Stable	SG	Chr06	48750865	48751411	Eucgr.F03804
761	qSG6_2Stable	SG	Chr06	48782050	48782846	Eucgr.F03807		RING/U-box superfamily protein
762	qSG6_2Stable	SG	Chr06	48803887	48806752	Eucgr.F03809
763	qSG6_2Stable	SG	Chr06	48810431	48813533	Eucgr.F03811		8-oxoguanine-DNA glycosylase 1
764	qSG6_2Stable	SG	Chr06	48830374	48833873	Eucgr.F03813		NRAMP metal ion transporter 6
765	qSG6_2Stable	SG	Chr06	48848167	48853658	Eucgr.F03814
766	qSG6_2Stable	SG	Chr06	48862516	48867126	Eucgr.F03815		Cyclin A1;1
767	qSG6_2Stable	SG	Chr06	48869835	48872941	Eucgr.F03816		Chalcone-flavanone isomerase family protein
768	qSG6_2Stable	SG	Chr06	48910700	48911155	Eucgr.F03819		RING/U-box superfamily protein
769	qSG6_2Stable	SG	Chr06	48932391	48935324	Eucgr.F03820	Eucgr.F03820	amino acid permease 3
770	qSG6_2Stable	SG	Chr06	48956868	48959539	Eucgr.F03823
771	qSG6_2Stable	SG	Chr06	48979599	48983497	Eucgr.F03826		peptide chain release factor, putative
772	qSG6_2Stable	SG	Chr06	49010240	49012861	Eucgr.F03827	Eucgr.F03827	amino acid permease 3
773	qSG6_2Stable	SG	Chr06	49061035	49062778	Eucgr.F03829		amino acid permease 2
774	qSG6_2Stable	SG	Chr06	49066218	49066826	Eucgr.F03830
775	qSG6_2Stable	SG	Chr06	49067367	49068766	Eucgr.F03831		Tetratricopeptide repeat (TPR)-like superfamily protein
776	qSG6_2Stable	SG	Chr06	49092620	49095273	Eucgr.F03834		bidirectional amino acid transporter 1
777	qSG6_2Stable	SG	Chr06	49097470	49099251	Eucgr.F03835		Pentatricopeptide repeat (PPR) superfamily protein
778	qSG6_2Stable	SG	Chr06	49101029	49101622	Eucgr.F03836
779	qSG6_2Stable	SG	Chr06	49107756	49108696	Eucgr.F03837		2-oxoglutarate (2OG) and Fe(II)-dependent oxygenase superfamily protein
780	qSG6_2Stable	SG	Chr06	49121995	49124258	Eucgr.F03839		2-oxoglutarate (2OG) and Fe(II)-dependent oxygenase superfamily protein
781	qSG6_2Stable	SG	Chr06	49125464	49131642	Eucgr.F03840		NAD kinase 2
782	qSG6_2Stable	SG	Chr06	49134420	49135117	Eucgr.F03842
783	qSG6_2Stable	SG	Chr06	49140520	49142454	Eucgr.F03843		transcription coactivators
784	qSG6_2Stable	SG	Chr06	49161332	49164638	Eucgr.F03845		receptor like protein 34
785	qSG6_2Stable	SG	Chr06	49170129	49175526	Eucgr.F03847
786	qSG6_2Stable	SG	Chr06	49260960	49262500	Eucgr.F03852		subunit NDH-M of NAD(P)H:plastoquinone dehydrogenase complex
787	qSG6_2Stable	SG	Chr06	49273913	49280321	Eucgr.F03855		Terpenoid cyclases/Protein prenyltransferases superfamily protein
788	qSG6_2Stable	SG	Chr06	49345308	49346055	Eucgr.F03858		Eukaryotic protein of unknown function (DUF872)
789	qSG6_2Stable	SG	Chr06	49361766	49363986	Eucgr.F03859		Eukaryotic protein of unknown function (DUF872)
790	qSG6_2Stable	SG	Chr06	49370277	49374066	Eucgr.F03861		Tetratricopeptide repeat (TPR)-like superfamily protein
791	qSG6_2Stable	SG	Chr06	49383450	49388081	Eucgr.F03862		phospholipase D alpha 1
792	qSG6_2Stable	SG	Chr06	49388761	49389514	Eucgr.F03863
793	qSG6_2Stable	SG	Chr06	49389725	49390264	Eucgr.F03864
794	qSG6_2Stable	SG	Chr06	49394052	49395257	Eucgr.F03865
795	qSG6_2Stable	SG	Chr06	49400220	49400726	Eucgr.F03867
796	qSG6_2Stable	SG	Chr06	49401918	49403974	Eucgr.F03868
797	qSG6_2Stable	SG	Chr06	49417953	49419582	Eucgr.F03869		Tetratricopeptide repeat (TPR)-like superfamily protein
798	qSG6_2Stable	SG	Chr06	49421646	49424321	Eucgr.F03870		S-domain-2 5
799	qSG6_2Stable	SG	Chr06	49437054	49439796	Eucgr.F03872		S-domain-2 5
800	qSG6_2Stable	SG	Chr06	49447671	49449649	Eucgr.F03873		Protein of unknown function (DUF567)
801	qSG6_2Stable	SG	Chr06	49487150	49489807	Eucgr.F03878		Cystathionine beta-synthase (CBS) protein
802	qSG6_2Stable	SG	Chr06	49504158	49506748	Eucgr.F03880		Ubiquitin-like superfamily protein
803	qSG6_2Stable	SG	Chr06	49515725	49519960	Eucgr.F03882		adenine phosphoribosyltransferase 5
804	qSG6_2Stable	SG	Chr06	49521266	49524161	Eucgr.F03883		Ubiquitin system component Cue protein
805	qSG6_2Stable	SG	Chr06	49537120	49542042	Eucgr.F03885		BED zinc finger ;hAT family dimerisation domain
806	qSG6_2Stable	SG	Chr06	49546620	49553490	Eucgr.F03886		Phox (PX) domain-containing protein
807	qSG6_2Stable	SG	Chr06	49554200	49561147	Eucgr.F03887		transmembrane receptors;ATP binding
808	qSG6_2Stable	SG	Chr06	49572347	49574817	Eucgr.F03888		Phox (PX) domain-containing protein
809	qSG6_2Stable	SG	Chr06	49604667	49605482	Eucgr.F03891		disease resistance protein (TIR-NBS-LRR class)
810	qSG6_2Stable	SG	Chr06	49614099	49616484	Eucgr.F03892		F-box/RNI-like superfamily protein
811	qSG6_2Stable	SG	Chr06	49698078	49700099	Eucgr.F03893		ARM repeat superfamily protein
812	qSG6_2Stable	SG	Chr06	49719225	49719717	Eucgr.F03895
813	qSG6_2Stable	SG	Chr06	49741890	49745768	Eucgr.F03896		Disease resistance protein (TIR-NBS-LRR class) family
814	qSG6_2Stable	SG	Chr06	49759666	49760446	Eucgr.F03897		Disease resistance protein (TIR-NBS-LRR class) family
815	qSG6_2Stable	SG	Chr06	49765978	49766976	Eucgr.F03898
816	qSG6_2Stable	SG	Chr06	49767026	49767528	Eucgr.F03899
817	qSG6_2Stable	SG	Chr06	49793929	49803082	Eucgr.F03902		F-box/RNI-like superfamily protein
818	qSG6_2Stable	SG	Chr06	49812490	49816966	Eucgr.F03904		FAR1-related sequence 8
819	qSG6_2Stable	SG	Chr06	47906189	47911266	Eucgr.F03722		PAM domain (PCI/PINT associated module) protein
820	qSG6_2Stable	SG	Chr06	48016808	48021857	Eucgr.F03735		serine hydroxymethyltransferase 7
821	qSG6_2Stable	SG	Chr06	48068478	48082135	Eucgr.F03741		PHD finger family protein
822	qSG6_2Stable	SG	Chr06	48117353	48122549	Eucgr.F03744		nitrate reductase 1
823	qSG6_2Stable	SG	Chr06	48184793	48193750	Eucgr.F03748		OSBP(oxysterol binding protein)-related protein 1C
824	qSG6_2Stable	SG	Chr06	48200867	48202067	Eucgr.F03749
825	qSG6_2Stable	SG	Chr06	48330372	48333107	Eucgr.F03763		flavonol synthase 1
826	qSG6_2Stable	SG	Chr06	48347005	48349338	Eucgr.F03765		S-locus lectin protein kinase family protein
827	qSG6_2Stable	SG	Chr06	48396958	48400485	Eucgr.F03770		Pyridoxal phosphate (PLP)-dependent transferases superfamily protein
828	qSG6_2Stable	SG	Chr06	48526485	48530783	Eucgr.F03784		EamA-like transporter family protein
829	qSG6_2Stable	SG	Chr06	48539944	48554320	Eucgr.F03787		ARM repeat superfamily protein
830	qSG6_2Stable	SG	Chr06	48557268	48563118	Eucgr.F03788		Tetratricopeptide repeat (TPR)-like superfamily protein
831	qSG6_2Stable	SG	Chr06	48610552	48611586	Eucgr.F03793		Acyl-CoA N-acyltransferases (NAT) superfamily protein
832	qSG6_2Stable	SG	Chr06	48641991	48644333	Eucgr.F03795		IAA-leucine resistant (ILR)-like gene 6
833	qSG6_2Stable	SG	Chr06	48765564	48776141	Eucgr.F03806		Armadillo/beta-catenin-like repeat ; C2 calcium/lipid-binding domain (CaLB) protein
834	qSG6_2Stable	SG	Chr06	48787003	48795310	Eucgr.F03808		signal recognition particle-related / SRP-related
835	qSG6_2Stable	SG	Chr06	48820395	48828086	Eucgr.F03812		SWITCH/sucrose nonfermenting 3C
836	qSG6_2Stable	SG	Chr06	48969292	48971947	Eucgr.F03824		amino acid permease 3
837	qSG6_2Stable	SG	Chr06	49069675	49073516	Eucgr.F03832		Preprotein translocase SecA family protein
838	qSG6_2Stable	SG	Chr06	49080444	49092515	Eucgr.F03833		Preprotein translocase SecA family protein
839	qSG6_2Stable	SG	Chr06	49133535	49140286	Eucgr.F03841		transcription coactivators
840	qSG6_2Stable	SG	Chr06	49167955	49169183	Eucgr.F03846
841	qSG6_2Stable	SG	Chr06	49217353	49218286	Eucgr.F03850
842	qSG6_2Stable	SG	Chr06	49242404	49257758	Eucgr.F03851		histone methyltransferases(H3-K4 specific);histone methyltransferases(H3-K36 specific)
843	qSG6_2Stable	SG	Chr06	49364985	49369778	Eucgr.F03860		Membrane fusion protein Use1
844	qSG6_2Stable	SG	Chr06	49397412	49399555	Eucgr.F03866		HSP20-like chaperones superfamily protein
845	qSG6_2Stable	SG	Chr06	49430264	49432969	Eucgr.F03871		S-domain-2 5
846	qSG6_2Stable	SG	Chr06	49462868	49464105	Eucgr.F03875		histidine phosphotransfer protein 6
847	qSG6_2Stable	SG	Chr06	49474023	49479857	Eucgr.F03876		post-illumination chlorophyll fluorescence increase
848	qSG6_2Stable	SG	Chr06	49476730	49479857	Eucgr.F03877		phosphatidic acid phosphatase-related / PAP2-related
849	qSG6_2Stable	SG	Chr06	49490665	49502101	Eucgr.F03879		Pre-mRNA-processing-splicing factor
850	qSG6_2Stable	SG	Chr06	49526638	49536227	Eucgr.F03884		Signal recognition particle, SRP54 subunit protein
851	qSG6_2Stable	SG	Chr06	47970479	47976555	Eucgr.F03731		LA RNA-binding protein
852	qSG6_2Stable	SG	Chr06	48364472	48367843	Eucgr.F03767
853	qSG6_2Stable	SG	Chr06	48496052	48499518	Eucgr.F03780
854	qSG6_2Stable	SG	Chr06	48756758	48764301	Eucgr.F03805		P-loop containing nucleoside triphosphate hydrolases superfamily protein
855	qSG6_2Stable	SG	Chr06	48231913	48237358	Eucgr.F03754		O-fucosyltransferase family protein
856	qSG6_2Stable	SG	Chr06	49282945	49292511	Eucgr.F03856		UDP-sugar pyrophosphorylase
857	qLC9_1Stable	LC	Chr09	28233400	28239018	Eucgr.I01834		Polynucleotidyl transferase, ribonuclease H-like superfamily protein
858	qLC9_1Stable	LC	Chr09	28248706	28259146	Eucgr.I01836		transferases;sulfuric ester hydrolases;catalytics;transferases
859	qLC9_1Stable	LC	Chr09	28284761	28289027	Eucgr.I01838		senescence-associated gene 101
860	qLC9_1Stable	LC	Chr09	28301638	28303744	Eucgr.I01839		senescence-associated gene 101
861	qLC9_1Stable	LC	Chr09	28346152	28346601	Eucgr.I01841		senescence-associated gene 101
862	qLC9_1Stable	LC	Chr09	28378302	28386788	Eucgr.I01843		senescence-associated gene 101
863	qLC9_1Stable	LC	Chr09	28399714	28403714	Eucgr.I01845		senescence-associated gene 101
864	qLC9_1Stable	LC	Chr09	28404232	28404540	Eucgr.I01846		AGAMOUS-like 62
865	qLC9_1Stable	LC	Chr09	28411910	28412481	Eucgr.I01847		senescence-associated gene 101
866	qLC9_1Stable	LC	Chr09	28439796	28440338	Eucgr.I01848
867	qLC9_1Stable	LC	Chr09	28451996	28452409	Eucgr.I01850
868	qLC9_1Stable	LC	Chr09	28456097	28456926	Eucgr.I01851
869	qLC9_1Stable	LC	Chr09	28457358	28458388	Eucgr.I01852
870	qLC9_1Stable	LC	Chr09	28463056	28463259	Eucgr.I01853		Cytochrome C oxidase subunit II-like, transmembrane domain
871	qLC9_1Stable	LC	Chr09	28470703	28471684	Eucgr.I01854		NADH-Ubiquinone/plastoquinone (complex I) protein
872	qLC9_1Stable	LC	Chr09	28478536	28480259	Eucgr.I01856		cytochrome oxidase 2
873	qLC9_1Stable	LC	Chr09	28480508	28481333	Eucgr.I01857
874	qLC9_1Stable	LC	Chr09	28486851	28487786	Eucgr.I01858
875	qLC9_1Stable	LC	Chr09	28492065	28492754	Eucgr.I01860		Unknown conserved protein
876	qLC9_1Stable	LC	Chr09	28493154	28494028	Eucgr.I01861
877	qLC9_1Stable	LC	Chr09	28541684	28542608	Eucgr.I01862
878	qLC9_1Stable	LC	Chr09	28559877	28560710	Eucgr.I01863		Cytochrome C assembly protein
879	qLC9_1Stable	LC	Chr09	28590195	28590948	Eucgr.I01866		senescence-associated gene 101
880	qLC9_1Stable	LC	Chr09	28591748	28592230	Eucgr.I01867		AGAMOUS-like 61
881	qLC9_1Stable	LC	Chr09	28596397	28600425	Eucgr.I01868		senescence-associated gene 101
882	qLC9_1Stable	LC	Chr09	28597296	28597930	Eucgr.I01869
883	qLC9_1Stable	LC	Chr09	28600667	28602027	Eucgr.I01870		AGAMOUS-like 29
884	qLC9_1Stable	LC	Chr09	28631150	28631537	Eucgr.I01871		senescence-associated gene 101
885	qLC9_1Stable	LC	Chr09	28635978	28638234	Eucgr.I01873		senescence-associated gene 101
886	qLC9_1Stable	LC	Chr09	28640108	28641724	Eucgr.I01874		RING/U-box superfamily protein with ARM repeat domain
887	qLC9_1Stable	LC	Chr09	28645688	28646191	Eucgr.I01875
888	qLC9_1Stable	LC	Chr09	28646164	28647036	Eucgr.I01876		zinc finger (AN1-like) family protein
889	qLC9_1Stable	LC	Chr09	28663482	28664417	Eucgr.I01878		Matrixin family protein
890	qLC9_1Stable	LC	Chr09	28678115	28681146	Eucgr.I01881		DP-E2F-like 1
891	qLC9_1Stable	LC	Chr09	28681662	28682980	Eucgr.I01882	Eucgr.I01882	galacturonosyltransferase-like 10
892	qLC9_1Stable	LC	Chr09	28686685	28687973	Eucgr.I01883
893	qLC9_1Stable	LC	Chr09	28689148	28699718	Eucgr.I01884		SIN3-like 2
894	qLC9_1Stable	LC	Chr09	28712649	28717561	Eucgr.I01886		ABC transporter family protein
895	qLC9_1Stable	LC	Chr09	28760116	28764759	Eucgr.I01887		ABC transporter family protein
896	qLC9_1Stable	LC	Chr09	28806343	28811637	Eucgr.I01888		ABC transporter family protein
897	qLC9_1Stable	LC	Chr09	28859214	28865727	Eucgr.I01889		ABC transporter family protein
898	qLC9_1Stable	LC	Chr09	28875713	28876261	Eucgr.I01891		Putative membrane lipoprotein
899	qLC9_1Stable	LC	Chr09	28877380	28880356	Eucgr.I01892		ABC transporter family protein
900	qLC9_1Stable	LC	Chr09	28898577	28899830	Eucgr.I01894		ABC transporter family protein
901	qLC9_1Stable	LC	Chr09	28920728	28923416	Eucgr.I01897		Oxoglutarate/iron-dependent oxygenase
902	qLC9_1Stable	LC	Chr09	28927047	28928508	Eucgr.I01898		Pathogenesis-related thaumatin superfamily protein
903	qLC9_1Stable	LC	Chr09	28962982	28964827	Eucgr.I01902		AAA-ATPase 1
904	qLC9_1Stable	LC	Chr09	28967467	28968819	Eucgr.I01903		P-loop containing nucleoside triphosphate hydrolases superfamily protein
905	qLC9_1Stable	LC	Chr09	28979430	28981936	Eucgr.I01904		P-loop containing nucleoside triphosphate hydrolases superfamily protein
906	qLC9_1Stable	LC	Chr09	28989565	28991145	Eucgr.I01905		P-loop containing nucleoside triphosphate hydrolases superfamily protein
907	qLC9_1Stable	LC	Chr09	28998217	28999623	Eucgr.I01906		AAA-ATPase 1
908	qLC9_1Stable	LC	Chr09	29001735	29003660	Eucgr.I01907	Eucgr.I01907	AAA-ATPase 1
909	qLC9_1Stable	LC	Chr09	29046731	29047623	Eucgr.I01908		LOB domain-containing protein 27
910	qLC9_1Stable	LC	Chr09	29093892	29095106	Eucgr.I01910
911	qLC9_1Stable	LC	Chr09	29105284	29106504	Eucgr.I01912	Eucgr.I01912	thioredoxin 2
912	qLC9_1Stable	LC	Chr09	29110832	29112055	Eucgr.I01913		thioredoxin 2
913	qLC9_1Stable	LC	Chr09	29117335	29117911	Eucgr.I01914
914	qLC9_1Stable	LC	Chr09	29122475	29125193	Eucgr.I01916
915	qLC9_1Stable	LC	Chr09	29136130	29141437	Eucgr.I01917		CLP-similar protein 3
916	qLC9_1Stable	LC	Chr09	29141863	29144297	Eucgr.I01918		Pectin lyase-like superfamily protein
917	qLC9_1Stable	LC	Chr09	29145030	29146882	Eucgr.I01919	Eucgr.I01919	Auxin efflux carrier family protein
918	qLC9_1Stable	LC	Chr09	29148200	29153841	Eucgr.I01920		high mobility group
919	qLC9_1Stable	LC	Chr09	29160156	29162160	Eucgr.I01921		Integrase-type DNA-binding superfamily protein
920	qLC9_1Stable	LC	Chr09	29170580	29173493	Eucgr.I01922		Leucine-rich repeat receptor-like protein kinase family protein
921	qLC9_1Stable	LC	Chr09	29205861	29211723	Eucgr.I01925		ATPase, V0/A0 complex, subunit C/D
922	qLC9_1Stable	LC	Chr09	29216903	29220763	Eucgr.I01926		Protein of unknown function (DUF1637)
923	qLC9_1Stable	LC	Chr09	29223497	29225818	Eucgr.I01927		WRKY DNA-binding protein 72
924	qLC9_1Stable	LC	Chr09	29230997	29231955	Eucgr.I01929		Protein kinase family protein with leucine-rich repeat domain
925	qLC9_1Stable	LC	Chr09	29240951	29241364	Eucgr.I01931
926	qLC9_1Stable	LC	Chr09	29242556	29245058	Eucgr.I01932		Leucine-rich repeat receptor-like protein kinase family protein
927	qLC9_1Stable	LC	Chr09	29266746	29268156	Eucgr.I01935		Glutaredoxin family protein
928	qLC9_1Stable	LC	Chr09	29274951	29276869	Eucgr.I01936		basic helix-loop-helix (bHLH) DNA-binding family protein
929	qLC9_1Stable	LC	Chr09	29287598	29288637	Eucgr.I01937
930	qLC9_1Stable	LC	Chr09	29291992	29294328	Eucgr.I01938		Ribosomal protein S4
931	qLC9_1Stable	LC	Chr09	29295541	29301062	Eucgr.I01939		Trypsin family protein with PDZ domain
932	qLC9_1Stable	LC	Chr09	29307432	29309291	Eucgr.I01940		NAC (No Apical Meristem) domain transcriptional regulator superfamily protein
933	qLC9_1Stable	LC	Chr09	29325552	29326138	Eucgr.I01942		mini zinc finger 2
934	qLC9_1Stable	LC	Chr09	29346297	29355221	Eucgr.I01943		structural maintenance of chromosome 3
935	qLC9_1Stable	LC	Chr09	29362446	29362925	Eucgr.I01945
936	qLC9_1Stable	LC	Chr09	28229086	28231891	Eucgr.I01833		Cellulose-synthase-like C4
937	qLC9_1Stable	LC	Chr09	28245586	28248036	Eucgr.I01835		Gibberellin-regulated family protein
938	qLC9_1Stable	LC	Chr09	28260438	28264403	Eucgr.I01837		senescence-associated gene 101
939	qLC9_1Stable	LC	Chr09	28325394	28330816	Eucgr.I01840		senescence-associated gene 101
940	qLC9_1Stable	LC	Chr09	28650713	28657604	Eucgr.I01877		CRM family member 2
941	qLC9_1Stable	LC	Chr09	28669097	28674462	Eucgr.I01880		ADP-glucose pyrophosphorylase family protein
942	qLC9_1Stable	LC	Chr09	28883008	28888408	Eucgr.I01893	Eucgr.I01893	ABC transporter family protein
943	qLC9_1Stable	LC	Chr09	28900140	28902752	Eucgr.I01895		ABC transporter family protein
944	qLC9_1Stable	LC	Chr09	28915482	28920014	Eucgr.I01896		methyltransferases
945	qLC9_1Stable	LC	Chr09	28949020	28950987	Eucgr.I01900		AAA-ATPase 1
946	qLC9_1Stable	LC	Chr09	29050751	29071432	Eucgr.I01909		Phosphoglycerate mutase-like family protein
947	qLC9_1Stable	LC	Chr09	29177268	29180122	Eucgr.I01923		Protein kinase family protein with leucine-rich repeat domain
948	qLC9_1Stable	LC	Chr09	29260607	29261939	Eucgr.I01934		homeobox protein 20
949	qLC9_1Stable	LC	Chr09	29310604	29314792	Eucgr.I01941		Protein of unknown function (DUF1666)
950	qLC9_1Stable	LC	Chr09	28442159	28442669	Eucgr.I01849
951	qLC9_1Stable	LC	Chr09	28571958	28576078	Eucgr.I01864		senescence-associated gene 101
952	qLC9_1Stable	LC	Chr09	28704360	28709677	Eucgr.I01885		ABC transporter family protein
953	qLC9_1Stable	LC	Chr09	29095138	29103014	Eucgr.I01911	Eucgr.I01911	H(+)-ATPase 11
954	qLC9_1Stable	LC	Chr09	29228619	29230948	Eucgr.I01928		Leucine-rich repeat receptor-like protein kinase family protein
955	qLC9_1Stable	LC	Chr09	29357537	29360861	Eucgr.I01944		Protein of unknown function (DUF1666)
956	qLC9_2Stable	LC	Chr09	29362446	29362925	Eucgr.I01945
957	qLC9_2Stable	LC	Chr09	29364189	29365540	Eucgr.I01946		Ribosomal protein L34e superfamily protein
958	qLC9_2Stable	LC	Chr09	29461146	29462066	Eucgr.I01953		Chitinase family protein
959	qLC9_2Stable	LC	Chr09	29482157	29483928	Eucgr.I01954		expansin A15
960	qLC9_2Stable	LC	Chr09	29495223	29496126	Eucgr.I01956		Uncharacterised protein family (UPF0497)
961	qLC9_2Stable	LC	Chr09	29498249	29500820	Eucgr.I01957		Leucine-rich repeat receptor-like protein kinase family protein
962	qLC9_2Stable	LC	Chr09	29513396	29515065	Eucgr.I01958		NAC domain containing protein 100
963	qLC9_2Stable	LC	Chr09	29525318	29526394	Eucgr.I01960
964	qLC9_2Stable	LC	Chr09	29528323	29530959	Eucgr.I01961	Eucgr.I01961	SPX domain gene 4
965	qLC9_2Stable	LC	Chr09	29531628	29536177	Eucgr.I01962		EXS (ERD1/XPR1/SYG1) family protein
966	qLC9_2Stable	LC	Chr09	29538809	29540081	Eucgr.I01963		emp24/gp25L/p24 family/GOLD family protein
967	qLC9_2Stable	LC	Chr09	29545320	29547890	Eucgr.I01964		EXS (ERD1/XPR1/SYG1) family protein
968	qLC9_2Stable	LC	Chr09	29548432	29550134	Eucgr.I01965		EXS (ERD1/XPR1/SYG1) family protein
969	qLC9_2Stable	LC	Chr09	29373807	29377146	Eucgr.I01947		cycling DOF factor 2
970	qLC9_2Stable	LC	Chr09	29521904	29527129	Eucgr.I01959		Pyridoxal phosphate (PLP)-dependent transferases superfamily protein
971	qLC9_2Stable	LC	Chr09	29569596	29574327	Eucgr.I01967		EXS (ERD1/XPR1/SYG1) family protein
972	qLC9_2Stable	LC	Chr09	29487490	29491386	Eucgr.I01955		Pentatricopeptide repeat (PPR) superfamily protein
973	qLC9_3Stable	LC	Chr09	29576270	29577208	Eucgr.I01968
974	qLC9_3Stable	LC	Chr09	29578915	29580258	Eucgr.I01969		emp24/gp25L/p24 family/GOLD family protein
975	qLC9_3Stable	LC	Chr09	29581115	29586065	Eucgr.I01970	Eucgr.I01970	EXS (ERD1/XPR1/SYG1) family protein
976	qLC9_3Stable	LC	Chr09	29587180	29588851	Eucgr.I01971		Pentatricopeptide repeat (PPR) superfamily protein
977	qLC9_3Stable	LC	Chr09	29590030	29593101	Eucgr.I01972		TPX2 (targeting protein for Xklp2) protein family
978	qLC9_3Stable	LC	Chr09	29597206	29597828	Eucgr.I01974
979	qLC9_3Stable	LC	Chr09	29602802	29605530	Eucgr.I01975		putative endonuclease or glycosyl hydrolase with C2H2-type zinc finger domain
980	qLC9_3Stable	LC	Chr09	29603082	29604000	Eucgr.I01976
981	qLC9_3Stable	LC	Chr09	29610637	29614046	Eucgr.I01978		Tetratricopeptide repeat (TPR)-like superfamily protein
982	qLC9_3Stable	LC	Chr09	29615569	29620673	Eucgr.I01979		galacturonosyltransferase 14
983	qLC9_3Stable	LC	Chr09	29626592	29633585	Eucgr.I01982		casein lytic proteinase B3
984	qLC9_3Stable	LC	Chr09	29633926	29636194	Eucgr.I01983
985	qLC9_3Stable	LC	Chr09	29640227	29643855	Eucgr.I01985
986	qLC9_3Stable	LC	Chr09	29645410	29646216	Eucgr.I01986		RING/U-box superfamily protein
987	qLC9_3Stable	LC	Chr09	29650026	29653462	Eucgr.I01987		delta subunit of Mt ATP synthase
988	qLC9_3Stable	LC	Chr09	29672441	29679567	Eucgr.I01989		U-box domain-containing protein
989	qLC9_3Stable	LC	Chr09	29679504	29680071	Eucgr.I01990
990	qLC9_3Stable	LC	Chr09	29680181	29683120	Eucgr.I01991		tRNA/rRNA methyltransferase (SpoU) family protein
991	qLC9_3Stable	LC	Chr09	29684785	29686891	Eucgr.I01992		Protein of unknown function (DUF179)
992	qLC9_3Stable	LC	Chr09	29690575	29694446	Eucgr.I01994		chorismate mutase 1
993	qLC9_3Stable	LC	Chr09	29695364	29696519	Eucgr.I01995		early nodulin-like protein 17
994	qLC9_3Stable	LC	Chr09	29697632	29699930	Eucgr.I01996	Eucgr.I01996	early nodulin-like protein 17
995	qLC9_3Stable	LC	Chr09	29706023	29706775	Eucgr.I01997
996	qLC9_3Stable	LC	Chr09	29711617	29715767	Eucgr.I01998		WRKY DNA-binding protein 4
997	qLC9_3Stable	LC	Chr09	29715930	29716338	Eucgr.I01999
998	qLC9_3Stable	LC	Chr09	29732328	29735370	Eucgr.I02001
999	qLC9_3Stable	LC	Chr09	29737920	29739402	Eucgr.I02002
1000	qLC9_3Stable	LC	Chr09	29740919	29741821	Eucgr.I02003
1001	qLC9_3Stable	LC	Chr09	29743857	29745603	Eucgr.I02004
1002	qLC9_3Stable	LC	Chr09	29756328	29758774	Eucgr.I02005		Eukaryotic protein of unknown function (DUF872)
1003	qLC9_3Stable	LC	Chr09	29759395	29759909	Eucgr.I02006
1004	qLC9_3Stable	LC	Chr09	29760102	29761334	Eucgr.I02007		related to AP2 11
1005	qLC9_3Stable	LC	Chr09	29761715	29762209	Eucgr.I02008
1006	qLC9_3Stable	LC	Chr09	29783065	29785790	Eucgr.I02010		Vesicle transport v-SNARE family protein
1007	qLC9_3Stable	LC	Chr09	29791040	29792750	Eucgr.I02011
1008	qLC9_3Stable	LC	Chr09	29806318	29808069	Eucgr.I02015		Pentatricopeptide repeat (PPR) superfamily protein
1009	qLC9_3Stable	LC	Chr09	29808479	29811057	Eucgr.I02016		Protein of unknown function (DUF1997)
1010	qLC9_3Stable	LC	Chr09	29814592	29816209	Eucgr.I02017		Duplicated homeodomain-like superfamily protein
1011	qLC9_3Stable	LC	Chr09	29853861	29857862	Eucgr.I02023
1012	qLC9_3Stable	LC	Chr09	29569596	29574327	Eucgr.I01967		EXS (ERD1/XPR1/SYG1) family protein
1013	qLC9_3Stable	LC	Chr09	29605887	29607823	Eucgr.I01977		calmodulin-binding protein-related
1014	qLC9_3Stable	LC	Chr09	29667480	29671980	Eucgr.I01988		Cyclic nucleotide-regulated ion channel family protein
1015	qLC9_3Stable	LC	Chr09	29687775	29689565	Eucgr.I01993		Tetratricopeptide repeat (TPR)-like superfamily protein
1016	qLC9_3Stable	LC	Chr09	29716556	29720755	Eucgr.I02000		Protein of unknown function (DUF1336)
1017	qLC9_3Stable	LC	Chr09	29766987	29778660	Eucgr.I02009		hypothetical protein 1
1018	qLC9_3Stable	LC	Chr09	29816674	29819819	Eucgr.I02018		voltage dependent anion channel 1
1019	qLC9_3Stable	LC	Chr09	29621645	29624870	Eucgr.I01980		membrane-anchored ubiquitin-fold protein 2
1020	qLC9_3Stable	LC	Chr09	29622236	29622922	Eucgr.I01981
1021	qSG10Stable	SG	Chr10	29511067	29513250	Eucgr.J02420		Protein of unknown function (DUF594)
1022	qSG10Stable	SG	Chr10	29527210	29529291	Eucgr.J02421		Protein of unknown function (DUF594)
1023	qSG10Stable	SG	Chr10	29537291	29539096	Eucgr.J02422		Ribosomal protein L2 family
1024	qSG10Stable	SG	Chr10	29544881	29548039	Eucgr.J02423		Disease resistance protein (CC-NBS-LRR class) family
1025	qSG10Stable	SG	Chr10	29554762	29556499	Eucgr.J02424		winged-helix DNA-binding transcription factor family protein
1026	qSG10Stable	SG	Chr10	29558481	29565116	Eucgr.J02425		winged-helix DNA-binding transcription factor family protein
1027	qSG10Stable	SG	Chr10	29568172	29571758	Eucgr.J02426
1028	qSG10Stable	SG	Chr10	29573718	29578074	Eucgr.J02427		zinc finger (Ran-binding) family protein
1029	qSG10Stable	SG	Chr10	29579672	29586192	Eucgr.J02428		2-oxoglutarate (2OG) and Fe(II)-dependent oxygenase superfamily protein
1030	qSG10Stable	SG	Chr10	29590414	29591405	Eucgr.J02429		Homeodomain-like superfamily protein
1031	qSG10Stable	SG	Chr10	29602067	29604477	Eucgr.J02430		flavanone 3-hydroxylase
1032	qSG10Stable	SG	Chr10	29617951	29618391	Eucgr.J02431
1033	qSG10Stable	SG	Chr10	29647199	29649893	Eucgr.J02434		Endoribonuclease/protein kinase IRE1-like
1034	qSG10Stable	SG	Chr10	29709353	29709651	Eucgr.J02438
1035	qSG10Stable	SG	Chr10	29712834	29714065	Eucgr.J02439		Pathogenesis-related thaumatin superfamily protein
1036	qSG10Stable	SG	Chr10	29714872	29716669	Eucgr.J02440		Pathogenesis-related thaumatin superfamily protein
1037	qSG10Stable	SG	Chr10	29733992	29735185	Eucgr.J02441		Endoribonuclease/protein kinase IRE1-like
1038	qSG10Stable	SG	Chr10	29737120	29738093	Eucgr.J02442		Pathogenesis-related thaumatin superfamily protein
1039	qSG10Stable	SG	Chr10	29739498	29740346	Eucgr.J02443		Pathogenesis-related thaumatin superfamily protein
1040	qSG10Stable	SG	Chr10	29755606	29756613	Eucgr.J02445		Pathogenesis-related thaumatin superfamily protein
1041	qSG10Stable	SG	Chr10	29792580	29796460	Eucgr.J02446		Pathogenesis-related thaumatin superfamily protein
1042	qSG10Stable	SG	Chr10	29798455	29800379	Eucgr.J02447		Major facilitator superfamily protein
1043	qSG10Stable	SG	Chr10	29810824	29815455	Eucgr.J02449		oligopeptide transporter 7
1044	qSG10Stable	SG	Chr10	29823687	29826370	Eucgr.J02450		oligopeptide transporter 7
1045	qSG10Stable	SG	Chr10	29829433	29830534	Eucgr.J02451		emp24/gp25L/p24 family/GOLD family protein
1046	qSG10Stable	SG	Chr10	29855592	29861736	Eucgr.J02452		Seven transmembrane MLO family protein
1047	qSG10Stable	SG	Chr10	29862841	29867634	Eucgr.J02453		regulatory particle non-ATPase 10
1048	qSG10Stable	SG	Chr10	29869731	29879230	Eucgr.J02454		Glycosyl hydrolase family 38 protein
1049	qSG10Stable	SG	Chr10	29908842	29915090	Eucgr.J02457		Glycosyl hydrolase family 38 protein
1050	qSG10Stable	SG	Chr10	29968605	29978744	Eucgr.J02459	Eucgr.J02459	Glycosyl hydrolase family 38 protein
1051	qSG10Stable	SG	Chr10	29997147	29998307	Eucgr.J02461
1052	qSG10Stable	SG	Chr10	30000831	30003163	Eucgr.J02462		Tetratricopeptide repeat (TPR)-like superfamily protein
1053	qSG10Stable	SG	Chr10	30003209	30005592	Eucgr.J02463	Eucgr.J02463	ascorbate peroxidase 3
1054	qSG10Stable	SG	Chr10	30008998	30013061	Eucgr.J02464		Protein of unknown function (DUF630) ;Protein of unknown function (DUF632)
1055	qSG10Stable	SG	Chr10	30042730	30043445	Eucgr.J02466		S-adenosyl-L-methionine-dependent methyltransferases superfamily protein
1056	qSG10Stable	SG	Chr10	30051817	30055097	Eucgr.J02468		RHO-related protein from plants 1
1057	qSG10Stable	SG	Chr10	30061847	30063721	Eucgr.J02469		GDSL-like Lipase/Acylhydrolase superfamily protein
1058	qSG10Stable	SG	Chr10	30072874	30076745	Eucgr.J02470		GDSL-like Lipase/Acylhydrolase superfamily protein
1059	qSG10Stable	SG	Chr10	30083802	30084283	Eucgr.J02471
1060	qSG10Stable	SG	Chr10	30084727	30088683	Eucgr.J02472		GDSL-like Lipase/Acylhydrolase superfamily protein
1061	qSG10Stable	SG	Chr10	30089588	30092309	Eucgr.J02473		F-box family protein
1062	qSG10Stable	SG	Chr10	30106791	30111955	Eucgr.J02474		PLAC8 family protein
1063	qSG10Stable	SG	Chr10	30115439	30116060	Eucgr.J02476
1064	qSG10Stable	SG	Chr10	30116162	30117824	Eucgr.J02477		Pentatricopeptide repeat (PPR) superfamily protein
1065	qSG10Stable	SG	Chr10	30120235	30122622	Eucgr.J02478		E3 ubiquitin ligase SCF complex subunit SKP1/ASK1 family protein
1066	qSG10Stable	SG	Chr10	30124280	30126419	Eucgr.J02479		Pentatricopeptide repeat (PPR) superfamily protein
1067	qSG10Stable	SG	Chr10	30127870	30128212	Eucgr.J02480
1068	qSG10Stable	SG	Chr10	30133588	30134358	Eucgr.J02482		Basic-leucine zipper (bZIP) transcription factor family protein
1069	qSG10Stable	SG	Chr10	30154969	30157504	Eucgr.J02483		winged-helix DNA-binding transcription factor family protein
1070	qSG10Stable	SG	Chr10	30163593	30165687	Eucgr.J02484		Peroxidase superfamily protein
1071	qSG10Stable	SG	Chr10	30167403	30172059	Eucgr.J02485		Eukaryotic aspartyl protease family protein
1072	qSG10Stable	SG	Chr10	30188444	30194628	Eucgr.J02488		aconitase 1
1073	qSG10Stable	SG	Chr10	30205449	30206010	Eucgr.J02491
1074	qSG10Stable	SG	Chr10	30207511	30208365	Eucgr.J02492
1075	qSG10Stable	SG	Chr10	30210464	30211930	Eucgr.J02493		Tetratricopeptide repeat (TPR)-like superfamily protein
1076	qSG10Stable	SG	Chr10	30225050	30228220	Eucgr.J02495		RNA-binding (RRM/RBD/RNP motifs) family protein
1077	qSG10Stable	SG	Chr10	30231689	30234845	Eucgr.J02496	Eucgr.J02496	NAD(P)H dehydrogenase (quinone)s
1078	qSG10Stable	SG	Chr10	30237274	30238531	Eucgr.J02497		F-box family protein with a domain of unknown function (DUF295)
1079	qSG10Stable	SG	Chr10	30240705	30242111	Eucgr.J02498		F-box family protein with a domain of unknown function (DUF295)
1080	qSG10Stable	SG	Chr10	30250757	30252537	Eucgr.J02500		SEC14 cytosolic factor family protein / phosphoglyceride transfer family protein
1081	qSG10Stable	SG	Chr10	30255873	30257349	Eucgr.J02501		F-box family protein with a domain of unknown function (DUF295)
1082	qSG10Stable	SG	Chr10	30263379	30264356	Eucgr.J02502		Protein of unknown function (DUF295)
1083	qSG10Stable	SG	Chr10	30266286	30267628	Eucgr.J02503		ascorbic acid mannose pathway regulator 1
1084	qSG10Stable	SG	Chr10	30273095	30274173	Eucgr.J02504		Protein of unknown function (DUF295)
1085	qSG10Stable	SG	Chr10	30275995	30277098	Eucgr.J02505		Protein of unknown function (DUF295)
1086	qSG10Stable	SG	Chr10	30278924	30280145	Eucgr.J02506		Protein of unknown function (DUF295)
1087	qSG10Stable	SG	Chr10	30285810	30287263	Eucgr.J02508		Protein of unknown function (DUF295)
1088	qSG10Stable	SG	Chr10	30287613	30288036	Eucgr.J02509
1089	qSG10Stable	SG	Chr10	30297894	30299071	Eucgr.J02511		Protein of unknown function (DUF295)
1090	qSG10Stable	SG	Chr10	30305774	30308929	Eucgr.J02513
1091	qSG10Stable	SG	Chr10	30311977	30314867	Eucgr.J02514		Protein of unknown function (DUF295)
1092	qSG10Stable	SG	Chr10	30319110	30320472	Eucgr.J02515		Protein of unknown function (DUF295)
1093	qSG10Stable	SG	Chr10	30328592	30330773	Eucgr.J02516		mitochondrial RNAediting factor 1
1094	qSG10Stable	SG	Chr10	30339222	30340483	Eucgr.J02518		basic chitinase
1095	qSG10Stable	SG	Chr10	30345680	30347323	Eucgr.J02519		basic chitinase
1096	qSG10Stable	SG	Chr10	30351489	30357292	Eucgr.J02520		MATE efflux family protein
1097	qSG10Stable	SG	Chr10	30377168	30381017	Eucgr.J02522		Calcium-dependent phosphotriesterase superfamily protein
1098	qSG10Stable	SG	Chr10	30397036	30400320	Eucgr.J02525		Calcium-dependent phosphotriesterase superfamily protein
1099	qSG10Stable	SG	Chr10	30412645	30418607	Eucgr.J02527		serine acetyltransferase 3;2
1100	qSG10Stable	SG	Chr10	30431653	30435523	Eucgr.J02529		Cyclin B2;3
1101	qSG10Stable	SG	Chr10	30447931	30448956	Eucgr.J02531		Undecaprenyl pyrophosphate synthetase family protein
1102	qSG10Stable	SG	Chr10	30471609	30473248	Eucgr.J02533
1103	qSG10Stable	SG	Chr10	30475278	30478134	Eucgr.J02534		RNA-binding (RRM/RBD/RNP motifs) family protein
1104	qSG10Stable	SG	Chr10	30480500	30483185	Eucgr.J02535		high mobility group B3
1105	qSG10Stable	SG	Chr10	30509122	30519008	Eucgr.J02538		MUTL protein homolog 3
1106	qSG10Stable	SG	Chr10	30520682	30522353	Eucgr.J02539
1107	qSG10Stable	SG	Chr10	30522696	30523336	Eucgr.J02540		mitochondrial ribosomal protein L11
1108	qSG10Stable	SG	Chr10	30525358	30532261	Eucgr.J02541		Endoribonuclease/protein kinase IRE1-like
1109	qSG10Stable	SG	Chr10	30530066	30530566	Eucgr.J02542
1110	qSG10Stable	SG	Chr10	30530339	30532297	Eucgr.A00114		inositol requiring 1-1
1111	qSG10Stable	SG	Chr10	30561000	30564866	Eucgr.J02544		Endoribonuclease/protein kinase IRE1-like
1112	qSG10Stable	SG	Chr10	30565534	30568408	Eucgr.J02545		Endoribonuclease/protein kinase IRE1-like
1113	qSG10Stable	SG	Chr10	30590876	30591613	Eucgr.J02547
1114	qSG10Stable	SG	Chr10	30626403	30629712	Eucgr.J02550		Auxin efflux carrier family protein
1115	qSG10Stable	SG	Chr10	30658249	30665841	Eucgr.J02553		Seven transmembrane MLO family protein
1116	qSG10Stable	SG	Chr10	30671981	30675194	Eucgr.J02555		phosphate transporter 3;3
1117	qSG10Stable	SG	Chr10	30675833	30678524	Eucgr.J02556		Translation initiation factor IF6
1118	qSG10Stable	SG	Chr10	30691422	30696159	Eucgr.J02558		RNA-binding (RRM/RBD/RNP motifs) family protein
1119	qSG10Stable	SG	Chr10	30691444	30691866	Eucgr.J02559
1120	qSG10Stable	SG	Chr10	30694508	30695012	Eucgr.J02560
1121	qSG10Stable	SG	Chr10	30705705	30709491	Eucgr.J02561		hydroxy methylglutaryl CoA reductase 1
1122	qSG10Stable	SG	Chr10	30730485	30731210	Eucgr.J02563		Peroxidase superfamily protein
1123	qSG10Stable	SG	Chr10	30746790	30749992	Eucgr.J02565		NADPH-dependent thioredoxin reductase A
1124	qSG10Stable	SG	Chr10	30754368	30755237	Eucgr.J02566
1125	qSG10Stable	SG	Chr10	30760451	30764737	Eucgr.J02567		serine/threonine phosphatase 7
1126	qSG10Stable	SG	Chr10	30774742	30779653	Eucgr.J02569		Auxin efflux carrier family protein
1127	qSG10Stable	SG	Chr10	30780655	30784339	Eucgr.J02570		diacylglycerol acyltransferase family
1128	qSG10Stable	SG	Chr10	30787069	30791088	Eucgr.J02571		diacylglycerol acyltransferase family
1129	qSG10Stable	SG	Chr10	30809458	30812954	Eucgr.J02572		Endoribonuclease/protein kinase IRE1-like
1130	qSG10Stable	SG	Chr10	30818892	30820779	Eucgr.J02573
1131	qSG10Stable	SG	Chr10	30826517	30831242	Eucgr.J02574		Subtilisin-like serine endopeptidase family protein
1132	qSG10Stable	SG	Chr10	30837253	30839497	Eucgr.J02576		Concanavalin A-like lectin protein kinase family protein
1133	qSG10Stable	SG	Chr10	30842781	30845040	Eucgr.J02577		Concanavalin A-like lectin protein kinase family protein
1134	qSG10Stable	SG	Chr10	30845352	30847088	Eucgr.J02578		2-oxoglutarate (2OG) and Fe(II)-dependent oxygenase superfamily protein
1135	qSG10Stable	SG	Chr10	30856688	30858161	Eucgr.J02579		2-oxoglutarate (2OG) and Fe(II)-dependent oxygenase superfamily protein
1136	qSG10Stable	SG	Chr10	30862935	30863456	Eucgr.J02580
1137	qSG10Stable	SG	Chr10	30908803	30913419	Eucgr.J02583		regulatory particle triple-A 1A
1138	qSG10Stable	SG	Chr10	30920899	30922194	Eucgr.J02585		UDP-Glycosyltransferase superfamily protein
1139	qSG10Stable	SG	Chr10	30928869	30932349	Eucgr.J02586
1140	qSG10Stable	SG	Chr10	30933765	30937859	Eucgr.J02587		O-fucosyltransferase family protein
1141	qSG10Stable	SG	Chr10	30939151	30939894	Eucgr.J02588
1142	qSG10Stable	SG	Chr10	30939937	30944488	Eucgr.J02589
1143	qSG10Stable	SG	Chr10	29669139	29672247	Eucgr.J02435		inositol requiring 1-1
1144	qSG10Stable	SG	Chr10	29687245	29688757	Eucgr.J02436
1145	qSG10Stable	SG	Chr10	29801641	29805860	Eucgr.J02448		oligopeptide transporter 7
1146	qSG10Stable	SG	Chr10	29892508	29902502	Eucgr.J02456	Eucgr.J02456	Glycosyl hydrolase family 38 protein
1147	qSG10Stable	SG	Chr10	29980027	29990000	Eucgr.J02460		Glycosyl hydrolase family 38 protein
1148	qSG10Stable	SG	Chr10	30045952	30049076	Eucgr.J02467		3-dehydroquinate synthase, putative
1149	qSG10Stable	SG	Chr10	30112949	30114914	Eucgr.J02475
1150	qSG10Stable	SG	Chr10	30129955	30130667	Eucgr.J02481
1151	qSG10Stable	SG	Chr10	30178276	30181302	Eucgr.J02487		RING/U-box superfamily protein
1152	qSG10Stable	SG	Chr10	30194886	30198843	Eucgr.J02489		2-oxoglutarate (2OG) and Fe(II)-dependent oxygenase superfamily protein
1153	qSG10Stable	SG	Chr10	30195387	30195905	Eucgr.J02490
1154	qSG10Stable	SG	Chr10	30293814	30294908	Eucgr.J02510		Protein of unknown function (DUF295)
1155	qSG10Stable	SG	Chr10	30331740	30344805	Eucgr.J02517		DHHC-type zinc finger family protein
1156	qSG10Stable	SG	Chr10	30359530	30362990	Eucgr.J02521		Calcium-dependent phosphotriesterase superfamily protein
1157	qSG10Stable	SG	Chr10	30392040	30396184	Eucgr.J02524		Calcium-dependent phosphotriesterase superfamily protein
1158	qSG10Stable	SG	Chr10	30421888	30431072	Eucgr.J02528		Golgi-localized GRIP domain-containing protein
1159	qSG10Stable	SG	Chr10	30483877	30496380	Eucgr.J02536		Transducin/WD40 repeat-like superfamily protein
1160	qSG10Stable	SG	Chr10	30505502	30508486	Eucgr.J02537
1161	qSG10Stable	SG	Chr10	30569550	30574512	Eucgr.J02546		Endoribonuclease/protein kinase IRE1-like
1162	qSG10Stable	SG	Chr10	30603867	30607164	Eucgr.J02548		Endoribonuclease/protein kinase IRE1-like
1163	qSG10Stable	SG	Chr10	30636213	30642725	Eucgr.J02551		Seven transmembrane MLO family protein
1164	qSG10Stable	SG	Chr10	30685039	30691323	Eucgr.J02557		RNA polymerase I specific transcription initiation factor RRN3 protein
1165	qSG10Stable	SG	Chr10	30715990	30720128	Eucgr.J02562		NADPH-dependent thioredoxin reductase A
1166	qSG10Stable	SG	Chr10	30767911	30772408	Eucgr.J02568		Auxin efflux carrier family protein
1167	qSG10Stable	SG	Chr10	30834599	30835036	Eucgr.J02575
1168	qSG10Stable	SG	Chr10	30896183	30902863	Eucgr.J02582		STRUBBELIG-receptor family 6
1169	qSG10Stable	SG	Chr10	29619730	29626104	Eucgr.J02432		calcium-dependent protein kinase 16
1170	qSG10Stable	SG	Chr10	29881149	29891088	Eucgr.J02455		Glycosyl hydrolase family 38 protein
1171	qSG10Stable	SG	Chr10	30013895	30016498	Eucgr.J02465		jasmonic acid carboxyl methyltransferase
1172	qSG10Stable	SG	Chr10	30538093	30541138	Eucgr.J02543		Endoribonuclease/protein kinase IRE1-like
1173	qSG10Stable	SG	Chr10	30405091	30408927	Eucgr.J02526		Calcium-dependent phosphotriesterase superfamily protein
